1 Pyruvate:ferredoxin oxidoreductase and low abundant ferredoxins support  
2 aerobic photomixotrophic growth in cyanobacteria

3 Yingying Wang<sup>a</sup>, Xi Chen<sup>a</sup>, Katharina Spengler<sup>a</sup>, Karoline Terberger<sup>a</sup>, Marko Boehm<sup>a,b</sup>, Jens Appel<sup>a,b</sup>,  
4 Thomas Barske<sup>c</sup>, Stefan Timm<sup>c</sup>, Natalia Battchikova<sup>d</sup>, Martin Hagemann<sup>c</sup>, Kirstin Gutekunst<sup>a,b</sup>

5 <sup>a</sup>Department of Biology, Botanical Institute, Christian-Albrechts-University, D-24118 Kiel,  
6 Germany; <sup>b</sup>Department of Molecular Plant Physiology, Bioenergetics in Photoautotrophs,  
7 University of Kassel, D-34132 Kassel, Germany, <sup>c</sup>Plant Physiology Department, University of  
8 Rostock, D-18059 Rostock, Germany, <sup>d</sup>Department of Biochemistry, Molecular Plant Biology,  
9 University of Turku, FI-20014 Turku, Finland

10 \*Kirstin Gutekunst

11 **Email:** [kirstin.gutekunst@uni-kassel.de](mailto:kirstin.gutekunst@uni-kassel.de)

12

13

14 **Author Contributions:** YW, NB, MH and KG designed research, YW, XC, KS, KT, MB, JA, TB, ST, NB  
15 performed research, all authors analyzed data, YW and KG wrote the first draft of the paper, all authors  
16 contributed to the final version.

17 **Competing Interest Statement:** The authors declare no conflict of interest.

18 **Keywords:** cyanobacteria, ferredoxin, GOGAT, pyruvate dehydrogenase

19

20 **Abstract**

21 The decarboxylation of pyruvate is a central reaction in the carbon metabolism of all organisms.  
22 Both the pyruvate:ferredoxin oxidoreductase (PFOR) and the pyruvate dehydrogenase (PDH)  
23 complex catalyze this reaction. Whereas PFOR reduces ferredoxin, the PDH complex utilizes NAD<sup>+</sup>.  
24 Anaerobes rely on PFOR, which was replaced during evolution by the PDH complex found in  
25 aerobes. Cyanobacteria possess both. Our data challenge the view that PFOR is exclusively utilized  
26 for fermentation. Instead, we show, that the cyanobacterial PFOR is stable in the presence of  
27 oxygen *in vitro* and is required for optimal photomixotrophic growth under aerobic conditions  
28 while the PDH complex is inactivated under the same conditions. We found that cells rely on a  
29 general shift from utilizing NAD(H)-dependent to ferredoxin-dependent enzymes under these  
30 conditions.

31 The utilization of ferredoxins instead of NAD(H) saves a greater share of the Gibbs free energy,  
32 instead of wasting it as heat. This obviously simultaneously decelerates metabolic reactions as  
33 they operate closer to their thermodynamic equilibrium. It is common thought that during  
34 evolution, ferredoxins were replaced by NAD(P)H due to their higher stability in an oxidizing  
35 atmosphere. However, utilization of NAD(P)H could also have been favored due to a higher  
36 competitiveness because of an accelerated metabolism.

## 37 Introduction

### 38 *FeS clusters, pyruvate:ferredoxin oxidoreductase and ferredoxins*

39 Live evolved under anaerobic conditions in an environment that was reducing and replete with  
40 iron and sulfur. Later on, hydrogen escape to space irreversibly oxidized Earth (1, 2). Prebiotic  
41 redox reactions, that took place on the surfaces of FeS minerals, are at present mimicked by  
42 catalytic FeS clusters in a plethora of enzymes and redox carriers (3, 4). One example are  
43 ferredoxins, that are small, soluble proteins containing 4Fe4S, 3Fe4S or 2Fe2S clusters and shuttle  
44 electrons between redox reactions. They display a wide range of redox potentials between -240  
45 mV to -680 mV and are involved in a variety of metabolic pathways (5). Ferredoxins are among  
46 the earliest proteins on Earth and are accordingly present in all three kingdoms of life (6). FeS  
47 enzymes are especially widespread in anaerobes (7).

48 The advent of oxygenic photosynthesis necessitated adaptations, as especially 4Fe4S clusters are  
49 oxidized and degraded to 3Fe4S in the presence of oxygen resulting in inactivated enzymes (7-9).  
50 In aerobes, FeS enzymes are commonly replaced by FeS cluster free isoenzymes or alternative  
51 metabolic strategies (8). One well known example is the replacement of the FeS cluster containing  
52 pyruvate:ferredoxin oxidoreductase (PFOR), which catalyzes the decarboxylation of pyruvate  
53 during fermentation in anaerobes, by the pyruvate dehydrogenase (PDH) complex for respiration  
54 in aerobes (7, 10). Both enzymes catalyze the same reaction, whereat PFOR uses ferredoxin as  
55 redox partner and the PDH complex reduces NAD<sup>+</sup>. PFORs are evolutionary old enzymes. They are  
56 widespread in autotrophic and heterotrophic bacteria, in archaea, amitochondriate eukaryotic  
57 protists, hydrogenosomes as well as in cyanobacteria and algae (7). Depending on organism,  
58 metabolism and conditions, PFOR can be involved in the oxidation of pyruvate for heterotrophy  
59 or alternatively catalyze the reverse reaction by fixing CO<sub>2</sub> and forming pyruvate from acetyl CoA  
60 for an autotrophic lifestyle (11-13). The enzyme might have played a central role for the evolution  
61 of both autotrophic and heterotrophic processes from the very beginning (14). PFOR indeed  
62 participates as CO<sub>2</sub> fixing enzyme in four out of seven currently known and most ancient  
63 autotrophic pathways (reverse tricarboxylic acid (rTCA) cycle, reversed oxidative tricarboxylic acid  
64 (roTCA) cycle, reductive acetyl-CoA pathway, and dicarboxylate/hydroxybutyrate (DC/HB) cycle)  
65 (12, 15). PFORs contain one to three 4Fe4S clusters and get in general readily inactivated by  
66 oxygen upon purification. So far, there are only three reported exceptions to this rule: the PFORs  
67 of *Halobacterium halobium*, *Desulfovibrio africanus* and *Sulfolobus acidocaldarius* are stable *in vitro*  
68 in the presence of oxygen (11, 16-19). Even though all three enzymes are stable upon  
69 purification in the presence of oxygen, anaerobic conditions are required for *in vitro* maintenance  
70 of enzyme activities with the PFORs of *Desulfovibrio africanus* and *Sulfolobus acidocaldarius*. The  
71 enzyme of *Halobacterium halobium* is the only reported PFOR so far, which is active under aerobic  
72 conditions *in vitro* (19, 20). *In vivo* studies on these PFORs under aerobic conditions are missing.  
73 Ferredoxins that contain 4Fe4S clusters are likewise vulnerable to oxidative degradation. In the  
74 evolution from anoxygenic to oxygenic photosynthesis, the soluble 4Fe4S ferredoxin, which  
75 transfers electrons from FeS-type photosystems PSI to other enzymes in anoxygenic  
76 photosynthesis was replaced by an oxygen-tolerant 2Fe2S ferredoxin (9). In addition, ferredoxins  
77 have in general been complemented or replaced by NAD(P)H as alternative, oxygen-insensitive  
78 reducing agents in aerobes (10).

79

### 80 *The pyruvate dehydrogenase complex*

81 The PDH complex, which utilizes NAD<sup>+</sup> is composed of the three subunits: pyruvate  
82 dehydrogenase (E1), dihydrolipoyl transacetylase (E2) and dihydrolipoyl dehydrogenase (E3). It

83 catalyzes the irreversible decarboxylation of pyruvate. The PDH complex is active under oxic  
84 conditions but gets inactivated under anaerobic conditions in both prokaryotes and eukaryotes,  
85 albeit via distinct mechanisms. In the absence of oxygen NADH/NAD<sup>+</sup> ratios rise as respiration  
86 does no longer oxidize the NADH coming from the PDH complex and the subsequent reactions of  
87 the TCA cycle. In prokaryotes, as e.g. *E. coli*, NADH interacts with the dihydrolipoyl dehydrogenase  
88 (E3) subunit and thereby inhibits the PDH complex (21, 22). In eukaryotes, the PDH complex gets  
89 inactivated at high NADH/NAD<sup>+</sup> ratios via phosphorylation of highly conserved serine residues in  
90 the pyruvate dehydrogenase (E1) subunit (23).

91 *Synechocystis* sp. PCC 6803 is a cyanobacterium that performs oxygenic photosynthesis and lives  
92 photoautotrophically by fixing CO<sub>2</sub> via the Calvin-Benson-Bassham (CBB) cycle. In the presence of  
93 external carbohydrates these are metabolized additionally, resulting in a photomixotrophic  
94 lifestyle. In darkness *Synechocystis* switches to a heterotrophic or under anaerobic conditions to  
95 a fermentative lifestyle. As in many cyanobacteria, pyruvate can be either decarboxylated via  
96 PFOR or alternatively via the PDH complex in *Synechocystis*. PFOR is assumed to be involved in  
97 fermentation under anoxic conditions and the PDH complex in aerobic respiration. The  
98 observation that *pfor* is transcribed under photoautotrophic conditions in the presence of oxygen  
99 in the cyanobacteria *Synechococcus* sp. PCC 7942 and *Synechocystis* was therefore surprising but  
100 is well in line with the observation that other enzymes assigned to anaerobic metabolism in  
101 eukaryotes are expressed in the presence of oxygen as well (10, 24). *Synechoystis* possesses a  
102 network of up to 11 ferredoxins containing 2Fe2S, 3Fe4S and 4Fe4S clusters (25, 26). The 2Fe2S  
103 ferredoxin 1 (Ssl0020) is essential and by far the most abundant ferredoxin in *Synechocystis* and  
104 is the principal acceptor of photosynthetic electrons at PSI (27). Structures, redox potentials and  
105 distinct functions have been resolved for some of the alternative low abundant ferredoxins,  
106 however, the metabolic significance of the complete network is still far from being understood  
107 (25, 26, 28-31).

108 In this study we show that PFOR and low abundant ferredoxins are required for optimal  
109 photomixotrophic growth under oxic conditions. In line with this we found that the cyanobacterial  
110 PFOR is stable in the presence of oxygen *in vitro*. PFOR and ferredoxins can functionally replace  
111 the NAD<sup>+</sup> dependent PDH complex, which we found to get inactivated at high NADH/NAD<sup>+</sup> ratios.  
112 Likewise, the ferredoxin dependent F-GOGAT (glutamine oxoglutarate aminotransferase) is  
113 essential for photomixotrophic growth as well and cannot be functionally replaced by the NADH  
114 dependent N-GOGAT. The cells obviously switch in their utilization of isoenzymes and redox pools.  
115 However, the key factor for this switch is not oxygen but are the highly reducing conditions within  
116 the cells. Our data suggest that the pool of ferredoxins in *Synechocystis* functions as an overflow  
117 basin to shuttle electrons, when the NADH/NAD<sup>+</sup> pool is highly reduced.

118

## 119 Results

120 The roles of PDH complex and PFOR were studied in *Synechocystis* under different growth  
121 conditions. PDH could not be deleted from the genome indicating that this enzyme complex is  
122 essential, whereas *pfor* was knocked out in a previous study (28). In line with this we found that  
123 all fully sequenced cyanobacteria contain a PDH complex, which points out its significance and  
124 that 56 % thereof possess a PFOR in addition (Fig. 1S). We unexpectedly found that the  
125 *Synechocystis*  $\Delta pfor$  deletion mutant was impaired in its photomixotrophic growth under oxic  
126 conditions in continuous light. Growth impairment was typically visible starting around day three  
127 to six of the growth experiment (Fig. 1A and 3A). Under photoautotrophic conditions  $\Delta pfor$  grew  
128 just as the WT (Fig. 1A). The oxygen concentration in the photomixotrophic cultures was close to

129 saturation around 250  $\mu\text{Mol O}_2$  throughout the growth experiment (Fig. S2). Studies on the  
130 transcription of *pfor* and the alpha subunit of the pyruvate dehydrogenase (E1) of *pdhA* revealed  
131 that both genes are transcribed under photomixo- and photoautotrophic conditions (Fig. S3).  
132 These observations raised two questions: Why is the PDH complex, which catalyzes the same  
133 reaction as PFOR, not able to compensate for the loss of PFOR? And how can PFOR, which is  
134 assumed to be oxygen-sensitive, be of physiological relevance in the presence of oxygen?  
135

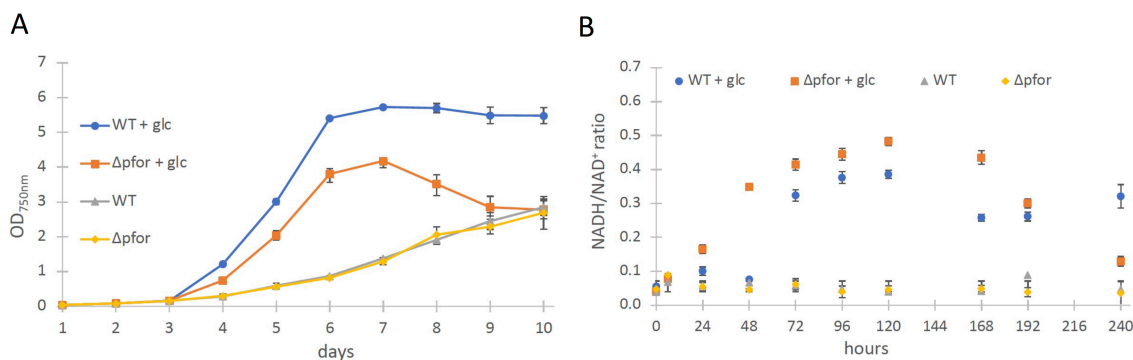

136  
137 Figure 1: (A) Growth and (B) NADH/NAD<sup>+</sup> ratios of wild type (WT) and  $\Delta pfor$  under photoautotrophic and  
138 photomixotrophic (+ glc) conditions in continuous light. Shown are mean values  $\pm$  SD from at least 3  
139 replicates.  
140

141 The most obvious assumption is that the PDH complex might get inactivated under  
142 photomixotrophic conditions. As the PDH complex gets inactivated at high NADH/NAD<sup>+</sup> ratios in  
143 prokaryotes and eukaryotes, we wondered if NADH/NAD<sup>+</sup> ratios might be increased under  
144 photomixotrophic conditions. Corresponding measurements confirmed this assumption.  
145 Whereas NADH/NAD<sup>+</sup> ratios were stable under photoautotrophic conditions in WT and  $\Delta pfor$  they  
146 raised three to fourfold in the first five days of photomixotrophic growth, exactly in that period in  
147 which the growth impairment of  $\Delta pfor$  in the presence of glucose was most apparent (Fig.1B).

148 In eukaryotes serine kinases phosphorylate three conserved serine residues of the pyruvate  
149 dehydrogenase (E1) at high NADH/NAD<sup>+</sup> ratios and thereby inhibit the PDH complex. In line with  
150 this, photomixotrophic growth of two out of ten serine/threonine protein kinase (spk) deletion  
151 mutants was affected, which indicates that phosphorylation of enzymes is relevant for optimal  
152 photomixotrophic growth in *Synechocystis* (Fig. S4).

153 In eukaryotes, phosphorylation of serine residues at sites 2 and 3 of the E1 subunit reduces  
154 enzyme activity moderately, whereas phosphorylation of the serine residue in site 1 alone  
155 completely inhibits the PDH complex (32-34). In order to check if the E1 subunit of *Synechocystis*  
156 contains these conserved serine residues as well, sequence alignments were performed and  
157 revealed that serine residues 2 and 3 are absent, whereas the serine residue 1 is present in  
158 *Synechocystis* and furthermore highly conserved in the E1 subunit of all 932 cyanobacterial PdhA  
159 sequences that were analyzed (Fig. S5 and S6). Immunoblot analyses indicate that the PdhA  
160 subunit of the PDH complex might either degrade or might get phosphohorylated at high  
161 NADH/NAD<sup>+</sup> ratios (Fig. S7 and S8). However, this could not be shown unambiguously as  
162 phosphorylation could not be confirmed by mass spectrometry (Table S3).  
163

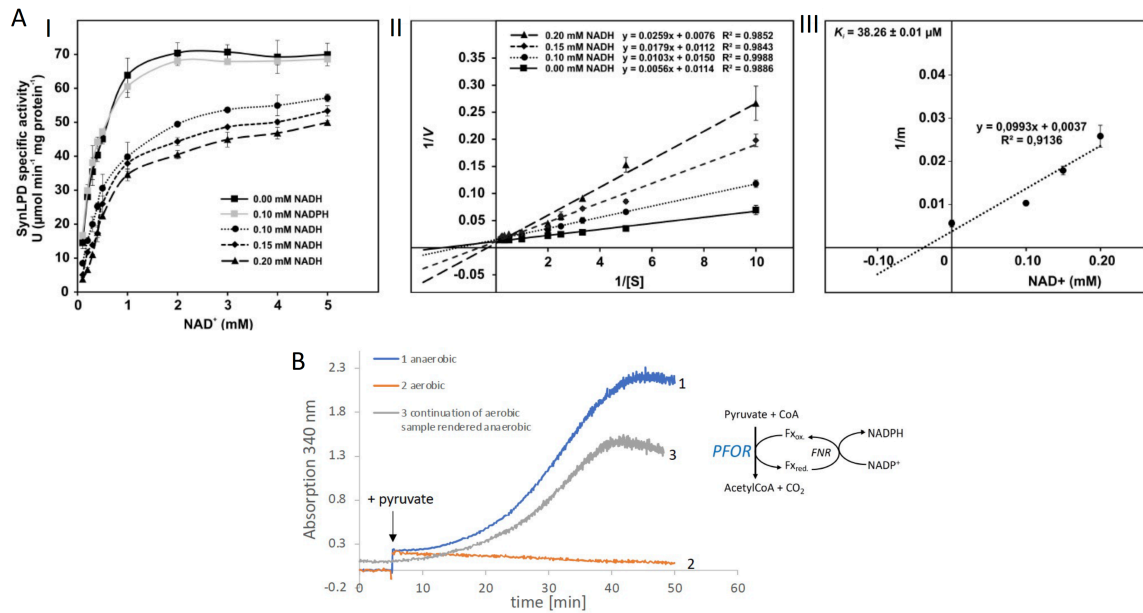

164  
165

166 Figure 2: (A) Inhibition of the PDH complex in *Synechocystis* via inactivation of the dihydrolipoyl  
167 dehydrogenase (E3) subunit (SynLPD) by NADH. I: The rate of recombinant SynLPD activity (3 mM DL-  
168 dihydrolipoic acid) as a function of NAD<sup>+</sup> (0.1, 0.2, 0.3, 0.4, 0.5, 1, 2, 3, 4 and 5 mM) reduction in the presence  
169 of the indicated NADH concentrations (0, 0.1, 0.15 and 0.2 mM). NADPH (0.1 mM) was used as a control to  
170 demonstrate the specificity of NADH inhibition. Specific enzyme activity is expressed in  $\mu\text{mol NADH per min}^{-1}$   
171  $\text{mg protein}^{-1}$  at 25°C. II: Lineweaver-Burk plots of enzyme activities at four NADH concentrations. III: The  
172 inhibitor constant ( $K_i$ ) was estimated by linear regression of (I) the slopes of the three Lineweaver-Burk plots  
173 at the four NADH concentrations versus (II) the NADH concentration. Shown are mean values  $\pm$  SD from at  
174 least 3 technical replicates. (B) Enzyme activity of PFOR that was purified in the presence of oxygen. PFOR  
175 activity was measured in the presence of FNR, ferredoxin and NADP<sup>+</sup>. The reaction was started by addition  
176 of 10 mM pyruvate as indicated by the arrow. Assay 1 (blue line): The assay mixture was kept anaerobic  
177 with 40 mM glucose, 40 U glucose oxidase and 50 U catalase, showing that PFOR, which was purified in the  
178 presence of oxygen, is active. Assay 2 (red line): Assay 2 had the same composition as assay 1 but glucose,  
179 glucose oxidase and catalase were omitted, showing that anaerobic conditions are required for activity of  
180 PFOR *in vitro*. Assay 3 (grey line): This assay is the continuation of the measurement of assay 2 after addition  
181 of glucose, glucose oxidase and catalase. Representative traces of three replicates are shown.

182

183 For prokaryotes it was shown that the PDH complex is inhibited by a distinct mechanism directly  
184 by NADH which binds to the dihydrolipoyl dehydrogenase (E3) subunit of the PDH complex.  
185 Therefore, the recombinant dihydrolipoyl dehydrogenase of *Synechocystis* (SynLPD) was tested in  
186 an *in vitro* assay with different NADH concentrations. The enzyme indeed loses activity at higher  
187 NADH/NAD<sup>+</sup> ratios, whereas NADPH has no effect (Fig. 2A). The SynLPD activity was completely  
188 inhibited by NADH with an estimated  $K_i$  of 38.3  $\mu\text{M}$  (Fig. 2A). Hence, the enzyme activity dropped  
189 to approximately 50% at a NADH/NAD<sup>+</sup> ratio of 0.1 (e.g. at 0.2 mM NADH in the presence of 2 mM  
190 NAD<sup>+</sup>). Please note, that much higher NADH/NAD<sup>+</sup> ratios (> 0.4) were measured in  
191 photomixotrophic cells of *Synechocystis* (see Fig. 1B). This points to an efficient inhibition of PDH  
192 activity via the highly decreased function of the E3 subunit (SynLPD). NADH/NAD<sup>+</sup> ratios above 0.1  
193 could not be tested in the enzyme assays due to the high background absorption of the added  
194 NADH, which prevented SynLPD activity detections. Taken together these measurements  
195 convincingly show that the PDH complex is most likely inhibited under photomixotrophic

196 conditions at high NADH/NAD<sup>+</sup> ratios, which provides evidence that pyruvate oxidation must be  
197 performed instead via PFOR and gives an explanation for the importance of PFOR under these  
198 conditions.

199 As the cyanobacterial PFOR is regarded as an oxygen sensitive enzyme that exclusively supports  
200 fermentation under anaerobic conditions, we overexpressed the enzyme and purified it in the  
201 presence of oxygen in order to check for its stability under aerobic conditions (Fig. S9, S10, S11C).  
202 Enzymatic tests revealed that PFOR from *Synechocystis* was indeed stable under aerobic  
203 conditions *in vitro*, which means that the enzyme was not degraded and kept its activity but  
204 required anoxic conditions for the decarboxylation of pyruvate (Fig. 2B) as reported for the oxygen  
205 stable PFORs of *Desulfovibrio africanus* and *Sulfolobus acidocaldarius* (11, 16).

206 In contrast to the PDH complex, PFOR transfers electrons from pyruvate to oxidized ferredoxin.  
207 In order to investigate if any of the low abundant ferredoxins (Fx) might be of importance for  
208 photomixotrophic growth, respective deletion mutants were generated (Table S1 and S2, Fig.  
209 S11A) and tested for their ability to grow under photoautotrophic and photomixotrophic  
210 conditions. To this end *fx3* (*slr1828*), *fx4* (*slr0150*), *fx6* (*ssl2559*), *fx7* (*sll0662*) and *fx9* (*slr2059*)  
211 could be completely deleted from the genome, whereas *fx2* (*sll1382*) and *fx5* (*slr0148*) kept some  
212 wild type copies of the genes. We did furthermore not succeed to delete *fx8* (*ssr3184*). Flavodoxin  
213 (*isiB*; *sll0284*), which replaces ferredoxins functionally under Fe-limitation was deleted as well. In  
214 addition, the double mutants  $\Delta fx7\Delta fx9$  and  $\Delta fx9\Delta isiB$  as well as the triple mutant  $\Delta fx7\Delta fx8\Delta fx9$   
215 were generated. Photoautotrophic growth of all these ferredoxin deletion mutants was similar to  
216 the WT (Fig. S12). However, under photomixotrophic conditions deletion of either *fx3*, *fx9* or  
217 flavodoxin (*isiB*) resulted in a growth behavior that was similar to  $\Delta pfor$  (Fig. 3A).

218 These results indicate that there might be a general shift to utilize the ferredoxin pool as soon as  
219 the NADH/NAD<sup>+</sup> pool is over reduced. Beside the PFOR/PDH complex couple, GOGAT (glutamine  
220 oxoglutarate aminotransferase) is as well present in form of two isoenzymes in *Synechocystis* that  
221 either utilizes reduced ferredoxin (F-GOGAT; *sll1499*) or NADH (N-GOGAT; *sll1502*). In line with  
222 our assumption that ferredoxin utilization is preferred in over reduced cells after glucose addition,  
223 we hypothesized that F-GOGAT might be required for optimal photomixotrophic growth.  
224 Respective deletion mutants were generated (Table S1 and S2, Fig. S11B) and revealed that  
225 neither  $\Delta f-gogat$  nor  $\Delta n-gogat$  were impaired in their growth under photoautotrophic conditions,  
226 whereas  $\Delta f-gogat$  displayed a strong growth impairment under photomixotrophic conditions in  
227 contrast to  $\Delta n-gogat$  and the WT (Fig. 3B). These data indicate that cells indeed rely on a general  
228 switch from utilizing NAD(H) to utilizing ferredoxins for optimal photomixotrophic growth. It was  
229 recently shown that photosynthetic complex I (NDH1) exclusively accepts electrons from reduced  
230 ferredoxin instead of NAD(P)H (35). Photosynthesis continues under photomixotrophic  
231 conditions. However, in addition to water oxidation at photosystem II (PSII), electrons from  
232 glucose oxidation can as well enter the respiratory/photosynthetic electron transport chain and  
233 eventually arrive at photosystem I (PSI) to support anoxygenic photosynthesis. Anoxygenic  
234 photosynthesis thus uses electrons from glucose oxidation that enter the  
235 respiratory/photosynthetic electron transport chain and are excited at PSI.  
236

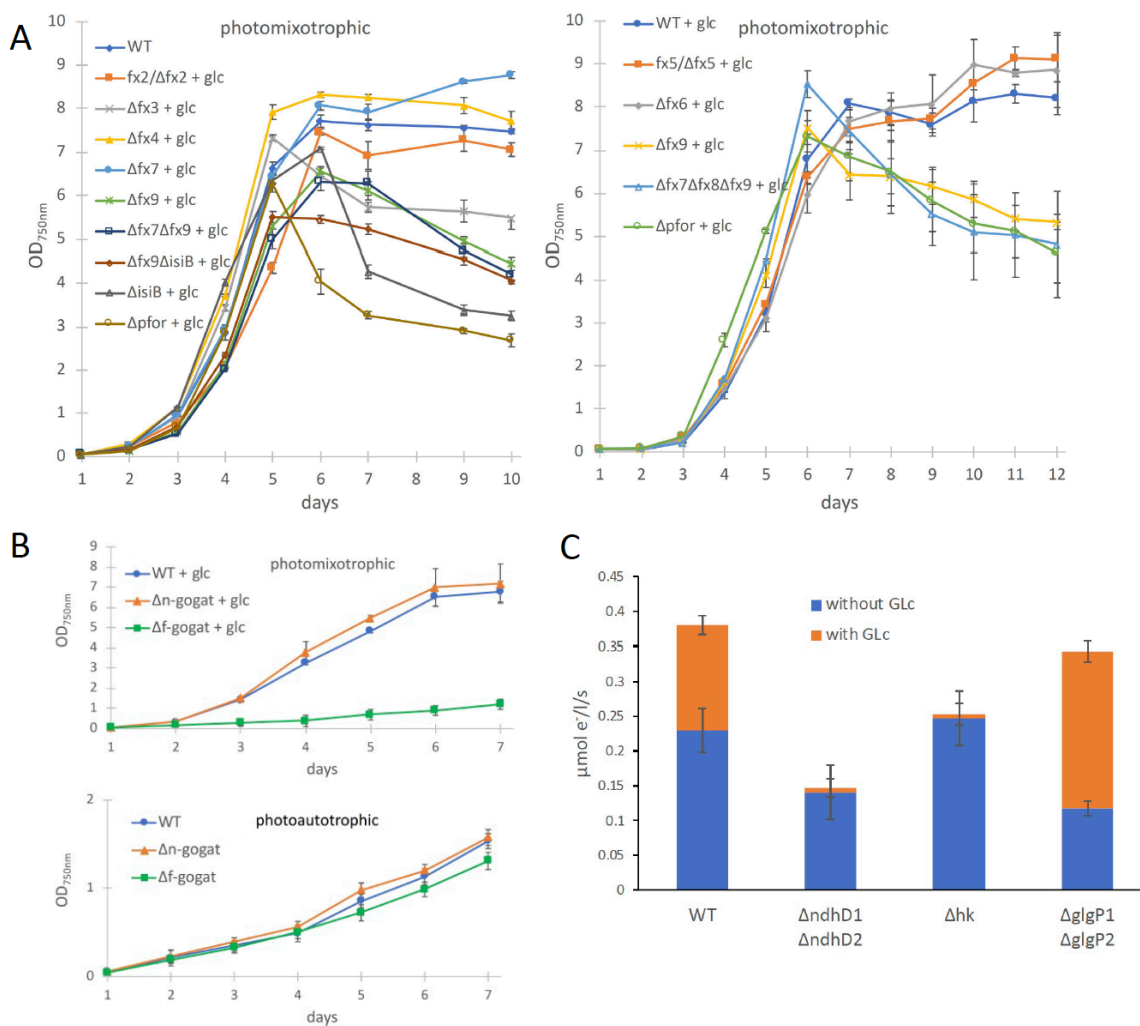

237

238

239

240

241

242

243

244

245

246

247

248

249

250

251

252

253

254

255

Figure 3: (A) Photomixotrophic growth of wild type (WT),  $\Delta pfor$ , ferredoxin (fx) and flavodoxin (isiB) deletion mutants as indicated. (B) Growth of WT,  $\Delta f-gogat$  and  $\Delta n-gogat$  under photoautotrophic and photomixotrophic conditions. (C) Electron transport with DCMU at PSI in the absence and presence of glucose in the WT,  $\Delta ndhD1\Delta ndhD2$ ,  $\Delta hk$  and  $\Delta glgP1\Delta glgP2$ . Shown are mean values  $\pm$  SD from at least 3 replicates.

Three entry points exist that can feed electrons from glucose oxidation into the plastoquinone (PQ) pool in the thylakoid membrane: the succinate dehydrogenase (SDH), which accepts electrons from the conversion of succinate to fumarate; NDH-2, which accepts electrons from NADH and photosynthetic complex I (NDH-1), which accepts electrons from reduced ferredoxin (see Fig. 4B). Based on the observed shift from utilizing ferredoxin instead of NAD(P)H, we thus wondered if photosynthetic complex I (NDH-1) might be required for anoxygenic photosynthesis under photomixotrophic conditions as an entry point for electrons coming from glucose oxidation. Cells were incubated with DCMU that blocks the electron transfer from PSII to the PQ-pool. Thereby, exclusively electron transfer from glycogen or glucose oxidation to PSI could be measured based on a recently developed protocol (36). According to this protocol electrons were counted that flow through PSI via DIRK<sub>PSI</sub> measurements by the KLAS/NIR instrument. The electron transport at PSI was then measured in the absence and in the presence of glucose. In addition to



256 the WT, several mutants were analyzed with deletions in entry points as well as glucose  
257 metabolizing enzymes. The mutant with a deleted photosynthetic complex I ( $\Delta ndhD1\Delta ndhD2$ )  
258 should no longer be able to feed electrons from reduced ferredoxin into the  
259 respiratory/photosynthetic electron transport chain, while the hexokinase mutant ( $\Delta hk$ ) should  
260 no longer be able to metabolize external glucose. The glycogen phosphorylase mutant  
261 ( $\Delta glgP1\Delta glgP2$ ) is unable to break down its internal glycogen reservoir (36-38). As expected and  
262 in parts shown recently (36), addition of glucose resulted in higher donations of electrons to PSI  
263 in the WT and  $\Delta glgP1\Delta glgP2$ , whereas neither  $\Delta ndhD1\Delta ndhD2$  nor  $\Delta hk$  were able to provide  
264 electrons from glucose oxidation to PSI (Fig. 3C). Anoxygenic photosynthesis using glucose  
265 oxidation and PSI thus relies on the ferredoxin dependent photosynthetic complex I. In line with  
266 this, it was shown earlier that  $\Delta ndhD1\Delta ndhD2$  is not able to grow in the presence of glucose and  
267 DCMU under photoheterotrophic conditions (39).

268 It should be noted in this context that there is no known glycolytic enzyme neither in the Emden-  
269 Meyerhoff-Parnass-, the Entner-Doudouhoff-, the phosphoketolase-, or the oxidative pentose  
270 phosphate pathway in *Synechocystis*, which utilizes ferredoxin as electron acceptor (38, 40, 41).  
271 PFOR is currently indeed the only known enzyme in the central carbon metabolism that reduces  
272 ferredoxin upon glucose oxidation (Fig. 4A). The second known source for reduced ferredoxin is  
273 PSI (Fig.4B). Further studies are required to elucidate the exact role of ferredoxins under  
274 photomixotrophic conditions.

275

## 276 Discussion

277 There is an irritating high number of reports in prokaryotes and eukaryotes on the presence and  
278 expression of enzymes under oxic conditions that are assigned to anaerobic metabolism (10, 24,  
279 42). One example is the production of hydrogen by the oxygen sensitive FeFe-hydrogenase in air-  
280 grown *Chlamydomonas reinhardtii* algae in a fully aerobic environment, which is enabled by  
281 microoxic niches within the thylakoid stroma (43). Another example is the constitutive expression  
282 of PFOR and the oxygen sensitive NiFe-hydrogenase under oxic conditions in cyanobacteria. By  
283 itself, the widespread presence of these enzymes in organisms that either live predominantly  
284 aerobically as e.g. cyanobacteria or are even obligate aerobes as e.g. *Sulfolobus acidocaldarius*,  
285 which possesses a PFOR, indicates a misconception and lack of understanding. The PFOR of  
286 *Sulfolobus acidocaldarius* could be isolated as stable enzyme in the presence of O<sub>2</sub>, however,  
287 enzyme activity measurements required the consumption of oxygen *in vitro* (11). Does this mean,  
288 that anaerobic micro-niches are required within this obligate aerobe to activate an enzyme of its  
289 central carbon metabolism? It might alternatively be that living cells have the ability to maintain  
290 reducing conditions in the presence of oxygen, which is a challenge in enzymatic *in vitro* assays.  
291 Conclusions on *in vivo* enzyme activities based on *in vitro* experiments therefore should be made  
292 with caution. Even though we could measure decarboxylation of pyruvate via PFOR only in the  
293 absence of oxygen *in vitro*, our data strongly indicate that this enzyme is active *in vivo* under  
294 aerobic and highly reducing conditions. We assume that either anaerobic micro-niches or  
295 alternatively mechanisms within the cell that are not understood yet, keep the enzyme active in  
296 an aerobic environment.

297 The replacement of FeS enzymes and ferredoxins by FeS free alternatives and NADPH in the  
298 course of evolution is in general discussed with regard to the oxygen sensitivity of FeS clusters in  
299 connection with the shift from anoxic to oxic conditions on Earth (8, 10). Oxygen is without any  
300 doubt one important factor. However, the shift from anoxic to oxic conditions went along with a  
301 shift from reducing to more oxidizing conditions. This shift was among others achieved by the

302 escape of hydrogen into space, which irreversibly withdrew electrons from Earth (2). The  
303 withdrawal of electrons and the establishment of oxidizing conditions might have been an  
304 additional important factor (independent of oxygen and the oxygen sensitivity of FeS clusters)  
305 that triggered these evolutionary changes by enabling reactions with higher driving forces. The  
306 idea is thus that PFOR and ferredoxins might have been replaced by the PDH complex and NADH  
307 due to their potential to release larger amounts of Gibbs free energy ( $\Delta G \ll 0$ ). When competing  
308 with other organisms for resources an accelerated metabolism can be highly beneficial. The  
309 decision to either utilize the PDH complex or alternatively PFOR and along this line, the  
310 replacement of PFOR by the PDH complex in the course of evolution might have been determined  
311 by the prioritization for high chemical driving forces. On that note, we were unable to delete the  
312 PDH complex in *Synechocystis*, which points to its essential role. PFOR is in contrast dispensable  
313 under photoautotrophic conditions and cells obviously prefer to decarboxylate pyruvate via the  
314 PDH complex under these conditions. By transferring electrons to  $\text{NAD}^+$  instead of ferredoxin less  
315 Gibbs free energy is stored. However, this comes along with a higher driving force that is visible  
316 when regarding the reaction Gibbs energies of  $\Delta_r G^m$  -39 kJ/mol for the reaction catalyzed by the  
317 PDH complex versus  $\Delta_r G^m$  -23 kJ/mol for the reaction catalyzed by PFOR (Fig. 4C) (44).  
318 Under photomixotrophic conditions, photosynthesis and glucose oxidation operate in parallel  
319 causing highly reducing conditions in the cells. As soon as the  $\text{NADH}/\text{NAD}^+$  pool is highly reduced,  
320 cells might be forced to switch to the ferredoxin pool, as shown by our data. Glucose is  
321 alternatively oxidized via four glycolytic routes. Flux analyzes have shown that glycolytic  
322 intermediates enter the CBB cycle, eventually lower glycolysis and finally provide pyruvate (45).  
323 Depending on the precise route taken, glucose oxidation yields distinct forms of reducing  
324 equivalents (38). Three enzymes are involved in oxidation steps: Glc6P dehydrogenase (Zwf) and  
325 6PG dehydrogenase (Gnd) yield NADPH, whereas GAP dehydrogenase (GAPDH) yields NADH.  
326 NAD(P)H is furthermore provided downstream in the TCA cycle. PFOR is thus the only known  
327 direct source for reduced ferredoxin in glucose oxidation (Fig. 4A). The wide network of low  
328 abundant ferredoxins in *Synechocystis* and the importance of these ferredoxins under  
329 photomixotrophic conditions on the one hand and the low number of known enzymes that  
330 directly reduce ferredoxins on the other hand unveils that our conception is not yet inherently  
331 consistent. An additional potential source of reduced ferredoxin could be the transfer of electrons  
332 from NAD(P)H. The transhydrogenase (PntAB), which is located in the thylakoid membrane utilizes  
333 proton translocation to transfer electrons from NADH to  $\text{NADP}^+$  (46). Electrons from NADPH could  
334 be further transferred to ferredoxin via ferredoxin-NADPH-oxidoreductase (FNR). Another  
335 potential turntable for the exchange of electrons is the diaphorase part of the NiFe-hydrogenase  
336 in *Synechocystis*, which was recently shown to shuttle electrons between NAD(P)H, flavodoxin  
337 and several ferredoxins *in vitro* (26).

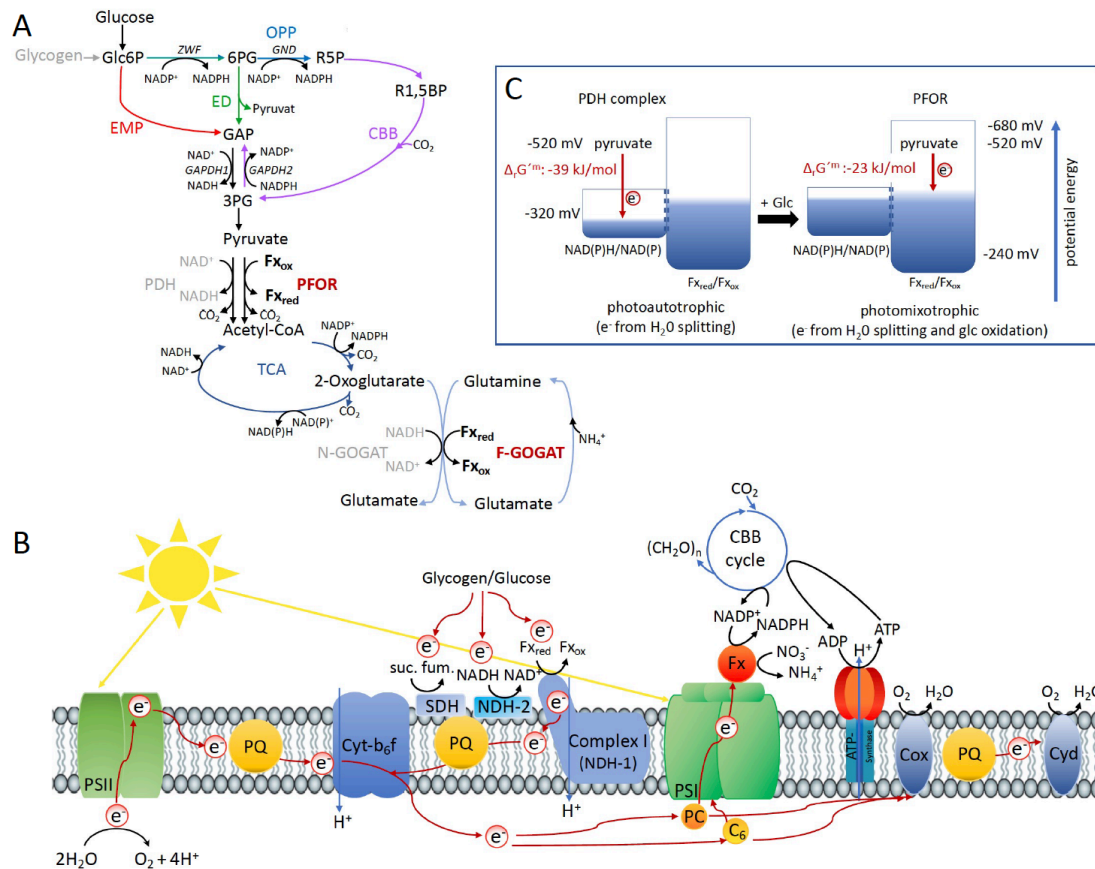

338

339

340

341

342

343

344

345

346

347

348

349

350

351

352

353

354

355

356

357

358

359

360

361

Figure 4: Optimal photomixotrophic growth requires low abundant ferredoxins, PFOR and F-GOGAT. Electrons from glucose oxidation that arrive at PSI require ferredoxin-dependent photosynthetic complex I (NDH-1). Cells shift from utilizing NAD(H) dependent to ferredoxin dependent enzymes when brought from photoautotrophic to photomixotrophic conditions. (A) Glycolytic routes, lower glycolysis and the TCA cycle yield NAD(P)H from glucose oxidation. The only known enzyme that produces reduced ferredoxin from glucose oxidation is PFOR. Both the decarboxylation of pyruvate as well as the synthesis from glutamate from 2-oxoglutarate and glutamine can be catalyzed by distinct enzymes that either utilize ferredoxin (PFOR, F-GOGAT) or NAD(H) (PDH-complex; N-GOGAT). (B) Photosynthetic complex I (NDH-1) accepts electrons from reduced ferredoxin. The complex is required for the input of electrons from glucose oxidation into anoxygenic photosynthesis in the presence of DCMU. (C) The  $\Delta_r G^m$  of pyruvate decarboxylation via the PDH complex is more negative than via PFOR, which results in a higher driving force. Photomixotrophy results in reducing conditions. The redox potential of the NAD(P)H/NAD(P)<sup>+</sup> pool which is around -320 mV will turn more negative upon reduction. This could facilitate the transfer of electrons from NADH to ferredoxins. In addition, inactivation of NAD<sup>+</sup> dependent enzymes (such as the PDH complex) and their functional replacement by ferredoxin dependent enzymes (such as PFOR) support the suggested shift from the utilization of the NAD(H) to the ferredoxin pool.

In order to get a complete picture, it would be essential to know the redox potentials of all ferredoxins in *Synechocystis*. Currently, they have been determined for Fx1 (-412 mV), Fx2 (-243 mV), and Fx4 (-440 mV), whereas the value for Fx4 is based on measurements of a homologue in *Thermosynechococcus elongatus* (27, 29, 30). Fx1 to Fx6 in *Synechocystis* possess 2Fe2S clusters for which redox potentials between -240 to -440 mV are typical (5). For 3Fe4S clusters as present in Fx8 (containing one 3Fe4S and one 4Fe4S cluster) redox potentials between -120 to -430 mV

362 were determined and for 4Fe4S clusters as present in Fx7 (4FeFS) and Fx9 (containing two 4Fe4S  
363 clusters) redox potentials between -300 to -680 mV were found (5). Without yet knowing the  
364 exact values for all ferredoxins in *Synechocystis*, it is anyway likely that they span a wide range of  
365 redox potentials.

366 The redox potential of any given couple does not have a constant value but is influenced among  
367 others by the ratio of the redox partners. The redox potential of the NADH/NAD<sup>+</sup> pool will thus  
368 turn more negative upon reduction. Obviously, storing electrons as reducing equivalents with  
369 lower redox potential saves more of their potential energy. The driving force of a reaction is on  
370 the other hand higher if electrons are transferred across larger redox potential differences. This  
371 will slow down the back reaction and thereby speed up the forward reaction. The idea is thus that  
372 the NADH/NAD<sup>+</sup> pool gets reduced first prioritizing high driving forces. However, as the redox  
373 potential of the NADH/NAD<sup>+</sup> pool turns slowly more negative, it might reach levels that are  
374 characteristic for ferredoxin couples. This might provoke a metabolic shift to transfer electrons to  
375 oxidized ferredoxin instead of NAD<sup>+</sup> (Fig. 4C). This shift can be regulated on several levels. Among  
376 others, as shown in this study, high NADH/NAD<sup>+</sup> ratios can inactivate enzymes that rely on this  
377 couple and thereby support the action of isoenzymes that interact with the Fx<sub>red</sub>/Fx<sub>ox</sub> couple  
378 instead. In addition, electron turntables as the transhydrogenase, FNR and the diaphorase can  
379 support this shift (26, 46).

380 In the case of *Synechocystis*, it is especially beneficial to shift their reducing equivalent pools to  
381 ferredoxin, as Fx is able to donate electrons to the photosynthetic complex I (35). In contrast to  
382 SDH and NDH-2, the photosynthetic complex I is coupled to a proton gradient and thus yields a  
383 higher amount of ATP. By shifting their pools of reducing equivalents, cells are thus able to save  
384 a greater share of the potential energy of electrons instead of wasting it as heat. As a pay-off, this  
385 shift should obviously come along with a slowdown of metabolic reactions.

386

## 387 **Conclusion**

388 The cyanobacterium *Synechocystis* encounters highly reducing conditions under  
389 photomixotrophy in the presence of oxygen. The PDH complex gets inactivated under these  
390 conditions at high NADH/NAD<sup>+</sup> ratios and is functionally most likely replaced by PFOR. PFOR is  
391 stable in the presence of oxygen *in vitro* and reduces ferredoxin instead of NAD<sup>+</sup>. PFOR, low  
392 abundant ferredoxins and the ferredoxin-dependent GOGAT are required for optimal  
393 photomixotrophic growth. Electrons from the oxidation of external glucose furthermore rely upon  
394 the presence of photosynthetic complex I (which accepts electrons from ferredoxin) in order to  
395 reach PSI. These findings indicate that cells perform a general shift in the utilization of their  
396 reducing equivalent pools from NAD(H) to ferredoxin under photomixotrophic conditions.

397

## 398 **Materials and Methods**

### 399 *Growth conditions*

400 All strains were grown in 50 ml BG-11 (47) buffered with TES pH 8. WT,  $\Delta pfor$ ,  $\Delta f-gogat$ ,  $\Delta n-gogat$ ,  
401  $\Delta isiB$ , all ferredoxin deletion mutants,  $\Delta ndhD1\Delta ndhD2$ ,  $\Delta hk$ , and  $\Delta glgP1\Delta glgP2$  were and placed  
402 in 100 ml Erlenmeyer flasks on a rotary shaker at 28 °C, 50  $\mu\text{E m}^{-2} \text{s}^{-1}$  and 100 rpm. After several  
403 days of growth, the cells were inoculated into 200 ml BG-11 at an OD<sub>750</sub> of 0.05 and placed into  
404 glass tubes bubbled with air at 50  $\mu\text{E m}^{-2} \text{s}^{-1}$  at 28 °C and growth was monitored by measuring the  
405 optical density at 750 nm. In liquid cultures all the strains were grown without addition of  
406 antibiotics and for photomixotrophic conditions 10 mM glucose was added. In case of the mutants  
407 deficient in Serine/Threonine- and Tyrosine kinases all strains were first inoculated from agar

408 plates into 100 ml BG-11-Medium. The cells were pre-cultivated shaking Erlenmeyer flasks (140  
409 rpm) for 7 days under ambient air with  $35 \mu\text{E m}^{-2} \text{s}^{-1}$  and  $30^\circ\text{C}$ . Ahead of the growth experiment,  
410 cells were harvested from the cultures by centrifugation ( $5000 \text{ xg}$ ,  $20^\circ\text{C}$ , 5 min) and re-suspended  
411 in fresh BG11 medium. The cultures were adjusted to  $\text{OD}_{750}$  of 0.5 with BG-11 medium and  
412 subsequently split into two aliquots. One part of the cultures was supplemented with 10 mM  
413 Glucose and the remaining part served as a control without glucose. *Synechocystis* strains were  
414 grown under ambient air conditions with  $35 \mu\text{E m}^{-2} \text{s}^{-1}$  and  $30^\circ\text{C}$ . Growth was monitored by  
415 measuring the  $\text{OD}_{750}$  every 24 h until the cultures reached the stationary growth phase. Pictures  
416 displaying the phenotypes were taken at the end of the cultivation period.  
417 For mutant selection and segregation the cells were grown on BG-11-agar containing 50  $\mu\text{g}/\text{mL}$   
418 kanamycin, 20  $\mu\text{g}/\text{mL}$  spectinomycin, 25  $\mu\text{g}/\text{mL}$  erythromycin, 10  $\mu\text{g}/\text{mL}$  gentamycin, and 20  
419  $\mu\text{g}/\text{mL}$  chloramphenicol.

420

#### 421 *Construction of mutants*

422 All the primers used in this study are listed in table S1. All mutants are listed in table S2. Most  
423 mutants were constructed in the non-motile GT WT of *Synechocystis* sp. PCC 6803 while a few  
424 serine/threonine protein kinase mutants were constructed in the motile PCC-M WT strain of  
425 *Synechocystis* as indicated in detail in table S2 (48). The procedure to generate the constructs for  
426 deletion of *pfor*, *pdhA*, *isiB* and the different ferredoxin genes was described in Hoffmann et al.  
427 (2006) (49). In brief, the up- and downstream regions as well as the required antibiotic resistance  
428 cassette were amplified by PCR. Subsequently, the three fragments were combined by a PCR  
429 fusion including the outermost primers. The resulting product was inserted by TA-cloning into the  
430 pCR2.1 TOPO-vector (ThermoFisher, Waltham, MA, USA). Constructs for the deletion of the genes  
431 of the NADH-dependent and the ferredoxin-dependent GOGAT were generated by Gibson cloning  
432 (50) assembling three fragments into the pBluescript SK(+) in a single step. After examination by  
433 sequencing the plasmids were transformed into *Synechocystis* sp. PCC 6803 cells as described  
434 (51). Resulting transformants were either checked by PCR or Southern hybridization after several  
435 rounds of segregation (Fig. S11). The deletion strains of the serine/threonine kinase genes *spkA*,  
436 *spkB*, *spkD*, *spkG* and *spkL* carry mutations in their kinase domains and were generated  
437 accordingly. Their segregation was complete and will be described elsewhere (Barkse and  
438 Hagemann, in preparation). To generate a construct for overexpression of *pfor* (*sll0741*) including  
439 a His-tag a DNA fragment containing 212 bp up- and 212 bp downstream of the *sll0741* start  
440 codon, with a BamHI, XhoI and NdeI site in between and 20 bp sequences that overlap with the  
441 pBluescript SK(+) vector at the respective ends was synthesized by GeneScript (Piscataway  
442 Township, NJ, USA)(Fig S6A). Another DNA fragment containing a modified petE promoter,  
443 followed by His-tag, TEV cleavage recognition site and linker encoding sequences, various  
444 restriction sites and 20 bp sequences that overlap with the pBluescript SK(+) vector at the  
445 respective ends was also synthesized by GenScript (Fig S6B). These fragments were cloned into  
446 the pBluescript SK(+) vector by Gibson cloning, respectively. A kanamycin antibiotic resistance  
447 cassette was inserted into the EcoRV site of the plasmid containing the modified petE promoter.  
448 The resulting promoter-cassette plasmid and the PFOR plasmid were digested with BamHI and  
449 NdeI and the promoter cassette was ligated into the alkaline phosphatase treated PFOR plasmid  
450 to yield the final construct. This plasmid was sequenced, transformed into *Synechocystis* sp. PCC  
451 6803 and segregation was confirmed by PCR analysis (Fig S9C).

452

453

454 *Southern-Blotting*

455 200 ng genomic DNA was digested with Hind III and loaded on a 0.8 % agarose gel in TBE buffer.  
456 After blotting the DNA on a nylon membrane (Hybond N+, Merck, Darmstadt, Germany) it was  
457 cross-linked to the membrane in a Stratalinker (Stratagene, CA, USA). Detection of the respective  
458 bands was carried out by the Dig DNA labeling and detection kit (Roche, Penzberg, Germany)  
459 according to the manufacturers instructions.

460

461 *RT-PCR*

462 To a volume of 15 µl containing 1 µg of RNA 2 µl RNase-free DNase (10 U/µl, MBI Fermentas, St.  
463 Leon-Rot, Germany), 2 µl 10 x DNase buffer (MBI Fermentas, St. Leon-Rot, Germany) and 1 µl  
464 Riboblock RNase Inhibitor (40 U/µl, MBI Fermentas, St. Leon-Rot, Germany) were added before  
465 incubation at 37 °C for 2 hours. Subsequently the sample was quickly cooled on ice. 2 µl 50 mM  
466 EDTA was added and it was incubated at 65 °C for 10 min and again quickly cooled on ice to get  
467 rid of the DNase activity. To check the digestion efficiency, 1 µl of the sample was used as a  
468 template for PCR. 1 µl genomic DNA and 1 µl H<sub>2</sub>O were used as positive and negative controls,  
469 respectively. Reverse transcription PCR was performed with 9 µl of those samples free of DNA  
470 with the RT-PCR kit (Applied Biosystems, Karlsruhe, Germany) according to the manufacturer's  
471 instruction. 9 µl of the same sample was used in parallel as a negative control. The reaction  
472 mixture was incubated for 1 h at 37 °C including a gene-specific tag-1 primer. For the subsequent  
473 PCR a gene-specific tag-2 primer and the respective reverse primer (s. table S1) were used.

474

475 *Oxygen measurements*

476 To measure the concentration of dissolved oxygen in the cultures oxygen sensors from Unisense  
477 (Unisense, Aarhus, Denmark) were used. After a two point calibration of the sensor by using  
478 distilled water equilibrated with air and a solution with 0.1 M NaOH and 0.1 M ascorbate  
479 containing no oxygen it was placed in the respective culture and the measurement was started.

480

481 *Mass spectrometry*

482 Pieces of the gel corresponding to bands 1-4 in the Fig. 2A were excised, reduced and alkylated  
483 following by digestion with Trypsin Gold (Promega) and extraction of peptides as described (52).  
484 Peptides from the bands 2-4 were further enriched for phosphopeptides using TiO<sub>2</sub> as described  
485 (53). Next, the peptides were analyzed by LC-MS/MS using a Q Exactive Hybrid Quadrupole-  
486 Orbitrap mass spectrometer (Thermo Scientific) connected in-line to an Easy-nLC HPLC system  
487 (Thermo Scientific), as described (53). The raw data were processed with Protein Discoverer  
488 software (Thermo Fisher Scientific, Inc.). Database searches were performed using the in-house  
489 Mascot server (Matrix Science) against a database of *Synechocystis* 6803 proteins supplemented  
490 with sequences of common protein contaminants. The search criteria allowed for one  
491 miscleavage of trypsin, oxidation of methionine, acetylation of the protein N-termini and  
492 phosphorylation of S, T and Y residues.

493

494 *Determination of NAD<sup>+</sup>/NADH*

495 All the cultures used for NAD<sup>+</sup>/NADH determination experiment were grown autotrophically and  
496 mixotrophically in 250 ml BG-11 medium. 5 ml to 10 ml cells, equivalent to about 10<sup>9</sup> cells/ml (10  
497 ml cultures of OD<sub>750</sub> of 1) were sampled for the measurements. The cells were centrifuged at 3,500  
498 x g -9 °C for 10 min and the pellets were washed with 1 ml 20 mM cold PBS (20 mM KH<sub>2</sub>PO<sub>4</sub>, 20  
499 mM K<sub>2</sub>HPO<sub>4</sub>, and 150 mM NaCl). The suspension was transferred to a 2 ml reaction cup and was

500 centrifuged at 12,000 x g for 1 min at -9 °C. For all further steps the NAD<sup>+</sup>/NADH Quantification  
501 Colorimetric Kit (Biovision, CA, USA ) was used. The pellet was resuspended in 50 µl extraction  
502 buffer and precooled glass beads (Ø=0.18 mm) were added to about 1 mm to the surface of the  
503 liquid. The mixture was vortexed 4 times 1 min in the cold room (4 °C) and intermittently chilled  
504 on the ice for 1 min. 150 µl extraction buffer was added again and the mixture was centrifuged at  
505 3,500 xg for 10 min at -9 °C. The liquid phase was transferred as much as possible into a new  
506 reaction cup and centrifuged at maximum speed for 30 min at -9 °C. All further steps were  
507 conducted as described by the manufacturer. Finally, the samples were incubated for 1 to 4 hours  
508 in 96 well plates before measuring absorbance at 450 nm by TECAN GENios (TECAN Group Ltd.,  
509 Austria) along with a NADH standard curve.

510

#### 511 *Immunoblots*

512 Whole cell extracts were applied on 10 % SDS-polyacrylamide gels according to the protocol of  
513 Laemmli (1970). After separation of the proteins the gel was semi-dry blotted on a nitrocellulose  
514 membrane (Roti-NC, 0.2 µm Transfer membrane for protein analyses, Carl Roth, Karlsruhe,  
515 Germany). For blocking the membrane was incubated in 2.5 % BSA in TBS (20 mM Tris pH 7.5, 150  
516 mM NaCl). For the detection of phosphorylated Serine residues a TBS solution with a 1:100  
517 dilution of the Anti-Phospho-Serin Antibody (Qiagen, Hilden, Germany) was used. For detection  
518 of the PdhA subunit an antibody was raised against the peptide TKYRREVLKDDGYDQ (Fig. S7) in  
519 rabbits by Agrisera (Umeå, Sweden). On the membranes 1:1000 dilution of this antibody in TBS  
520 was used. As secondary antibody either an anti-mouse IgG-HRP conjugate or an anti-rabbit IgG-  
521 HRP conjugate was used at 1:10,000 dilution. For detection the membrane was immersed in a 1:1  
522 mixture of solution A (100 mM Tris/HCl pH = 8.5, 0.4 mM p-coumaric acid, 2.5 µM luminol) and  
523 solution B (100 mM Tris/HCl pH = 8.5, 100 mM H<sub>2</sub>O<sub>2</sub>) for 1 min and subsequently exposed to an  
524 X-ray film (Thermo Scientific CL-XPosure Film, Life Technologies GmbH, Germany).

525

#### 526 *Antibody against the PdhA subunit of the PDH complex*

527 In order to raise an antibody against the alpha subunit of PdhA from the PDH complex, the peptide  
528 TKYRREVLKDDGYDQ (Fig. S7) was used for immunization of rabbits (Agrisera, Umeå, Sweden).

529

#### 530 *Purification and activity measurement of dihydrolipoyl dehydrogenase (E3 subunit, SynLPD)*

531 The recombinant His-tagged SynLPD (Slr1096) was generated and purified essentially as described  
532 previously (54). Prior activity measurements, the elution fractions were desalted through PD10  
533 columns (GE healthcare, Solingen, Germany). The protein concentration was determined  
534 according to Bradford (55). SynLPD activity was determined in the forward direction. DL-  
535 dihydrolipoic acid served as the substrate at a final concentration of 3 mM. SynLPD activity was  
536 followed as reduction of NAD<sup>+</sup> (included in varying concentrations, 0.1, 0.2, 0.3, 0.4, 0.5, 1, 2, 3, 4  
537 and 5 mM) at 340 nm. The K<sub>i</sub> constant was estimated in the presence of four NADH concentrations  
538 (0, 0.1, 0.15 and 0.2 mM) as well as NADPH (0.1 mM) as control. Specific enzyme activity is  
539 expressed in µmol NADH per min<sup>-1</sup> mg protein<sup>-1</sup> at 25°C. Mean values and standard deviations  
540 were calculated from at least three technical replicates for all substrate/co-substrate  
541 combinations. All chemicals were purchased from Merck (Darmstadt, Germany).

542

#### 543 *Purification of pyruvate:ferredoxin oxidoreductase (PFOR)*

544 For the purification of PFOR from *Synechocystis* sp. PCC 6803 (Fig. S9, S10), three 6-L autotrophic  
545 cultures of the PFOR overexpression strain (PFOR:oe) were grown to an OD<sub>750</sub> of about 1. Cells

546 were harvested by centrifugation at 4.000 rpm in a JLA-8.1000 rotor for 20 min at 4°C. Initially,  
547 His-PFOR over-expression in the 6-L cultures was assessed by SDS PAGE analysis followed by  
548 immunoblotting with a His-tag specific antibody (GenScript; Fig S7). A specific band could be  
549 detected in the over-expression mutant, confirming expression and stable accumulation of the  
550 over-expressed and N-terminally His-tagged PFOR protein. For large-scale purification cells were  
551 resuspended in lysis buffer (50 mM NaPO<sub>4</sub> pH=7.0; 250 mM NaCl; 1 tablet complete protease  
552 inhibitor EDTA free (Roche, Basel, Switzerland) per 50 mL) and broken by passing them through a  
553 French Press cell at 1250 p.s.i. twice. Unbroken cells and membranes were pelleted in a Beckman  
554 ultracentrifuge using a 70 Ti rotor at 35.000 rpm for 45 min at 4°C. The decanted soluble extract  
555 was adjusted to a volume of 90 mL with lysis buffer and incubated with 10 mL TALON cobalt resin  
556 (Takara, Shiga, Japan) for 1 h at 4°C. The resin was then washed extensively with 200 mL lysis  
557 buffer and subsequently with 100 mL lysis buffer containing 5 mM imidazole. Bound proteins were  
558 eluted with 20 mL elution buffer (50 mM NaPO<sub>4</sub> pH=7.0; 250 mM NaCl; 500 mM imidazole). The  
559 protein was concentrated overnight to a volume of 2 mL in a Vivaspin 20 Ultrafiltration Unit (5  
560 kDa MWCO)(Merck, Darmstadt, Germany) and then loaded onto a HiLoad™ 26/60 Superdex™  
561 75 prep grade (GE Healthcare, Chicago, IL, USA) using 25 mM NaPO<sub>4</sub>, pH=7.0; 50 mM NaCl; 5%  
562 (v/v) glycerol as the running buffer. The run was monitored at 280 nm and fractions were collected  
563 (Fig. 8A).

564

#### 565 *Activity measurement of pyruvate:ferredoxin oxidoreductase (PFOR)*

566 The specific activity of the pyruvate:ferredoxin oxidoreductase was measured essentially as  
567 described (11). The activity assay contained in 1 ml 100 mM Tris-HCl (pH 8), 0.5 mM Coenzyme A,  
568 10 mM pyruvate, 5 mM thiamine pyrophosphate, 40 mM glucose, 40 U glucose oxidase, 50 U  
569 catalase, and 10 mM methyl viologen. Reduction of methylviologen was followed at 604 nm and  
570 an extinction coefficient of 13.6 mM<sup>-1</sup> cm<sup>-1</sup> was used. The reaction was started by adding 8.9 x 10<sup>-5</sup>  
571 M isolated PFOR.

572 We also tested ferredoxin reduction by the PFOR by a mixture containing the same substances as  
573 above except methyl viologen. To this mixture 1.6 mM ferredoxin 1 and 1.3 mM ferredoxin:NADP<sup>+</sup>  
574 reductase and 1 mM NADP<sup>+</sup> were added. In this case the reduction of NADP<sup>+</sup> was followed at 340  
575 nm. The same mixture without glucose, glucose oxidase and catalase were used to test if the  
576 enzyme also works in the presence of oxygen.

577

#### 578 *In-vivo electron flow through photosystem I*

579 The electron flux through photosystem I was measured by the Dual-KLAS/NIR (Walz GmbH,  
580 Effeltrich, Germany) by a newly developed method (36). In brief, cell suspensions were adjusted  
581 to 20 µg/mL chlorophyll and 20 µM DCMU was added. Electron flow through PSI was determined  
582 by dark-interval relaxation kinetics (DIRK) measurements at a light intensity of 168 µE/m<sup>2</sup>/s in the  
583 absence and presence of 10 mM glucose.

584

#### 585 *Determination of reaction Gibbs energies*

586 Δ<sub>r</sub>G<sup>m</sup> for the reaction catalyzed by the PDH complex and by PFOR were calculated using  
587 eQuilibrator (<http://ealibrator.weizmann.ac.il/>) according to (44). CO<sub>2</sub> (total) was considered as  
588 hydrated and dehydrated forms of CO<sub>2</sub> are considered to be in equilibrium in biochemical  
589 reactions. Ionic strength of 0.2M, pH of 7 and metabolite concentrations of 1 mM were assumed.  
590 In order to determine the redox potential of pyruvate we used the reactions Gibbs energy of -39  
591 kJ/mol for the PDH complex and -23 kJ/mol for PFOR. Assuming a redox potential of -320 mV for



592 NAD(P)H and -400 mV for ferredoxin the potential of pyruvate was determined according to  $\Delta G =$   
593  $-nF\Delta E$  to -520 mV.

594

#### 595 **Acknowledgments**

596 Technical assistance of Klaudia Michl during the growth experiments of serine/threonine protein  
597 kinase (spk) deletion mutants is acknowledged.

598 This study was supported by grants from the China Scholarship Council (CSC) (Grant #  
599 201406320187), FAZIT-Stiftung, Deutsche Bundesstiftung Umwelt, German Ministry of Science  
600 and Education (BMBF FP309), and the German Science Foundation (DFG Gu1522/2-1,  
601 HA2002/23-1 and FOR2816).

602

#### 603 **References**

- 604 1. K. J. Zahnle, D. C. Catling, M. W. Claire, The rise of oxygen and the hydrogen hourglass.  
605 *Chemical Geology* **362**, 26-34 (2013).
- 606 2. D. C. Catling, K. J. Zahnle, C. P. McKay, Biogenic Methane, Hydrogen Escape, and the  
607 Irreversible Oxidation of Early Earth. *Science* **293**, 839 (2001).
- 608 3. M. J. Russell, W. Martin, The rocky roots of the acetyl-CoA pathway. *Trends in*  
609 *Biochemical Sciences* **29**, 358-363 (2004).
- 610 4. G. Wächtershäuser, Evolution of the first metabolic cycles. *Proceedings of the National*  
611 *Academy of Sciences* **87**, 200 (1990).
- 612 5. J. Liu *et al.*, Metalloproteins Containing Cytochrome, Iron–Sulfur, or Copper Redox  
613 Centers. *Chemical Reviews* **114**, 4366-4469 (2014).
- 614 6. J. D. Kim, A. Rodriguez-Granillo, D. A. Case, V. Nanda, P. G. Falkowski, Energetic  
615 Selection of Topology in Ferredoxins. *PLoS Comput Biol* **8**, e1002463 (2012).
- 616 7. M. Müller *et al.*, Biochemistry and Evolution of Anaerobic Energy Metabolism in  
617 Eukaryotes. *Microbiology and Molecular Biology Reviews* **76**, 444 (2012).
- 618 8. J. A. Imlay, Iron-sulphur clusters and the problem with oxygen. *Molecular Microbiology*  
619 **59**, 1073-1082 (2006).
- 620 9. B. Jagannathan, G. Shen, J. Golbeck, The evolution of type I reaction centers: the  
621 response to oxygenic photosynthesis. *Advances in Photosynthesis and Respiration* **33**  
622 (2012).
- 623 10. S. B. Gould *et al.*, Adaptation to life on land at high O<sub>2</sub> via transition from ferredoxin-to  
624 NADH-dependent redox balance. *Proceedings of the Royal Society B: Biological Sciences*  
625 **286**, 20191491 (2019).
- 626 11. A. Witt, R. Pozzi, S. Diesch, O. Hädicke, H. Grammel, New light on ancient enzymes –  
627 in vitro CO<sub>2</sub> Fixation by Pyruvate Synthase of *Desulfovibrio africanus* and *Sulfolobus*  
628 *acidocaldarius*. *The FEBS Journal* **286**, 4494-4508 (2019).
- 629 12. A. Mall *et al.*, Reversibility of citrate synthase allows autotrophic growth of a  
630 thermophilic bacterium. *Science* **359**, 563 (2018).
- 631 13. M. C. Evans, B. B. Buchanan, D. I. Arnon, A new ferredoxin-dependent carbon reduction  
632 cycle in a photosynthetic bacterium. *Proceedings of the National Academy of Sciences of*  
633 *the United States of America* **55**, 928-934 (1966).
- 634 14. K. Gutekunst, Hypothesis on the Synchronistic Evolution of Autotrophy and  
635 Heterotrophy. *Trends in Biochemical Sciences* **43**, 402-411 (2018).
- 636 15. G. Fuchs, Alternative Pathways of Carbon Dioxide Fixation: Insights into the Early  
637 Evolution of Life? *Annual Review of Microbiology* **65**, 631-658 (2011).

- 638 16. L. Pieulle *et al.*, Isolation and characterization of the pyruvate-ferredoxin oxidoreductase  
639 from the sulfate-reducing bacterium *Desulfovibrio africanus* *Biochimica Et Biophysica*  
640 *Acta-Protein Structure and Molecular Enzymology* **1250**, 49-59 (1995).
- 641 17. L. Pieulle, V. Magro, E. C. Hatchikian, Isolation and analysis of the gene encoding the  
642 pyruvate-ferredoxin oxidoreductase of *Desulfovibrio africanus*, production of the  
643 recombinant enzyme in *Escherichia coli*, and effect of carboxy-terminal deletions on its  
644 stability. *Journal of Bacteriology* **179**, 5684-5692 (1997).
- 645 18. N. Vita, E. C. Hatchikian, M. Nouailler, A. Dolla, L. Pieulle, Disulfide Bond-Dependent  
646 Mechanism of Protection against Oxidative Stress in Pyruvate-Ferredoxin  
647 Oxidoreductase of Anaerobic *Desulfovibrio* Bacteria. *Biochemistry* **47**, 957-964 (2007).
- 648 19. L. Kerscher, D. Oesterhelt, Purification and Properties of Two 2-Oxoacid:Ferredoxin  
649 Oxidoreductases from *Halobacterium halobium*. *European Journal of Biochemistry* **116**,  
650 587-594 (1981).
- 651 20. L. Kerscher, D. Oesterhelt, Ferredoxin is the coenzyme of alpha-ketoacid  
652 oxidoreductases in *Halobacterium halobium*. *FEBS Lett* **83**, 197-201 (1977).
- 653 21. Y. Kim, L. O. Ingram, K. T. Shanmugam, Dihydrolipoamide Dehydrogenase Mutation  
654 Alters the NADH Sensitivity of Pyruvate Dehydrogenase Complex of *Escherichia coli* K-  
655 12. *Journal of Bacteriology* **190**, 3851-3858 (2008).
- 656 22. Z. Sun *et al.*, Amino acid substitutions at glutamate-354 in dihydrolipoamide  
657 dehydrogenase of *Escherichia coli* lower the sensitivity of pyruvate dehydrogenase to  
658 NADH. *Microbiology* **158**, 1350-1358 (2012).
- 659 23. E. Kolobova, A. Tuganova, I. Boulatnikov, K. M. Popov, Regulation of pyruvate  
660 dehydrogenase activity through phosphorylation at multiple sites. *Biochem. J.* **358**, 69-  
661 77 (2001).
- 662 24. O. Schmitz, J. Gurke, H. Bothe, Molecular evidence for the aerobic expression of *nifJ*,  
663 encoding pyruvate : ferredoxin oxidoreductase, in cyanobacteria. *FEMS Microbiol. Lett.*  
664 **195**, 97-102 (2001).
- 665 25. C. Cassier-Chauvat, F. Chauvat, Function and Regulation of Ferredoxins in the  
666 Cyanobacterium *Synechocystis* PCC6803: Recent Advances. *Life* **4**, 666-680 (2014).
- 667 26. J. H. Artz *et al.*, The structure and reactivity of the HoxEFU complex from the  
668 cyanobacterium *Synechocystis* sp. PCC 6803. *Journal of Biological Chemistry*  
669 10.1074/jbc.RA120.013136 (2020).
- 670 27. H. Bottin, B. Lagoutte, Ferredoxin and flavodoxin from the cyanobacterium  
671 *Synechocystis* sp PCC 6803. *Biochimica et Biophysica Acta (BBA) - Bioenergetics* **1101**,  
672 48-56 (1992).
- 673 28. K. Gutekunst *et al.*, The Bidirectional NiFe-hydrogenase in *Synechocystis* sp. PCC 6803 Is  
674 Reduced by Flavodoxin and Ferredoxin and Is Essential under Mixotrophic, Nitrate-  
675 limiting Conditions. *Journal of Biological Chemistry* **289**, 1930-1937 (2014).
- 676 29. M. Schorsch *et al.*, A unique ferredoxin acts as a player in the low-iron response of  
677 photosynthetic organisms. *Proceedings of the National Academy of Sciences* **115**,  
678 E12111 (2018).
- 679 30. T. Motomura *et al.*, An alternative plant-like cyanobacterial ferredoxin with  
680 unprecedented structural and functional properties. *Biochimica et Biophysica Acta (BBA)*  
681 *- Bioenergetics* **1860**, 148084 (2019).
- 682 31. H. Mustila, Y. Allahverdiyeva, J. Isojärvi, E. M. Aro, M. Eisenhut, The bacterial-type [4Fe-  
683 4S] ferredoxin 7 has a regulatory function under photooxidative stress conditions in the

- 684 cyanobacterium *Synechocystis* sp. PCC 6803. *Biochimica et Biophysica Acta (BBA) -*  
685 *Bioenergetics* **1837**, 1293-1304 (2014).
- 686 32. L. G. Korotchkina, M. S. Patel, Probing the Mechanism of Inactivation of Human  
687 Pyruvate Dehydrogenase by Phosphorylation of Three Sites. *Journal of Biological*  
688 *Chemistry* **276**, 5731-5738 (2001).
- 689 33. J. Fan *et al.*, Tyr-301 Phosphorylation Inhibits Pyruvate Dehydrogenase by Blocking  
690 Substrate Binding and Promotes the Warburg Effect. *Journal of Biological Chemistry* **289**,  
691 26533-26541 (2014).
- 692 34. F. Seifert *et al.*, Phosphorylation of Serine 264 Impedes Active Site Accessibility in the E1  
693 Component of the Human Pyruvate Dehydrogenase Multienzyme Complex‡.  
694 *Biochemistry* **46**, 6277-6287 (2007).
- 695 35. J. M. Schuller *et al.*, Structural adaptations of photosynthetic complex I enable  
696 ferredoxin-dependent electron transfer. *Science* **363**, 257-260 (2019).
- 697 36. M. L. Theune *et al.*, In-vivo quantification of electron flow through photosystem I –  
698 Cyclic electron transport makes up about 35% in a cyanobacterium. *Biochimica et*  
699 *Biophysica Acta (BBA) - Bioenergetics* **1862**, 148353 (2021).
- 700 37. S. Doello, A. Klotz, A. Makowka, K. Gutekunst, K. Forchhammer, A specific glycogen  
701 mobilization strategy enables awakening of dormant cyanobacteria from chlorosis. *Plant*  
702 *Physiology* **177**, 594-603 (2018).
- 703 38. A. Makowka *et al.*, Glycolytic Shunts Replenish the Calvin–Benson–Bassham Cycle as  
704 Anaplerotic Reactions in Cyanobacteria. *Molecular Plant* **13**, 471-482 (2020).
- 705 39. H. Ohkawa, H. B. Pakrasi, T. Ogawa, Two types of functionally distinct NAD(P)H  
706 dehydrogenases in *Synechocystis* sp. strain PCC6803. *J Biol Chem* **275**, 31630-31634  
707 (2000).
- 708 40. X. Chen *et al.*, The Entner–Doudoroff pathway is an overlooked glycolytic route in  
709 cyanobacteria and plants. *Proceedings of the National Academy of Sciences* **113**, 5441-  
710 5446 (2016).
- 711 41. W. Xiong *et al.*, Phosphoketolase pathway contributes to carbon metabolism in  
712 cyanobacteria. *Nature Plants* **2**, 15187 (2015).
- 713 42. K. Gutekunst *et al.*, LexA regulates the bidirectional hydrogenase in the cyanobacterium  
714 *Synechocystis* sp. PCC 6803 as a transcription activator. *Molecular Microbiology* **58**, 810-  
715 823 (2005).
- 716 43. O. Liran *et al.*, Microoxic Niches within the Thylakoid Stroma of Air-Grown  
717 *Chlamydomonas reinhardtii* Protect [FeFe]-Hydrogenase and Support Hydrogen  
718 Production under Fully Aerobic Environment. *Plant Physiology* **172**, 264-271 (2016).
- 719 44. E. Noor, H. S. Haraldsdóttir, R. Milo, R. M. T. Fleming, Consistent Estimation of Gibbs  
720 Energy Using Component Contributions. *PLOS Computational Biology* **9**, e1003098  
721 (2013).
- 722 45. T. Nakajima *et al.*, Integrated Metabolic Flux and Omics Analysis of *Synechocystis* sp.  
723 PCC 6803 under Mixotrophic and Photoheterotrophic Conditions. *Plant and Cell*  
724 *Physiology* **55**, 1605-1612 (2014).
- 725 46. J. Kämäräinen *et al.*, Pyridine nucleotide transhydrogenase PntAB is essential for optimal  
726 growth and photosynthetic integrity under low-light mixotrophic conditions in  
727 *Synechocystis* sp. PCC 6803. *New Phytologist* 10.1111/nph.14353, n/a-n/a (2016).

- 728 47. R. Rippka, J. Deruelles, J. B. Waterbury, M. Herdman, R. Y. Stanier, Generic Assignments,  
729 Strain Histories and Properties of Pure Cultures of Cyanobacteria. *Journal of General*  
730 *Microbiology* **111**, 1-61 (1979).
- 731 48. D. Trautmann, B. Voss, A. Wilde, S. Al-Babili, W. R. Hess, Microevolution in  
732 cyanobacteria: re-sequencing a motile substrain of *Synechocystis* sp. PCC 6803. *DNA Res*  
733 **19**, 435-448 (2012).
- 734 49. D. Hoffmann, K. Gutekunst, M. Klissenbauer, R. Schulz-Friedrich, J. Appel, Mutagenesis  
735 of hydrogenase accessory genes of *Synechocystis* sp. PCC 6803. *FEBS Journal* **273**, 4516-  
736 4527 (2006).
- 737 50. D. G. Gibson *et al.*, Enzymatic assembly of DNA molecules up to several hundred  
738 kilobases. *Nature Methods* **6**, 343-345 (2009).
- 739 51. J. G. K. Williams, "Construction of specific mutations in photosystem II photosynthetic  
740 reaction center by genetic engineering methods in *Synechocystis* 6803" in *Methods in*  
741 *Enzymology*. (Academic Press, 1988), vol. 167, pp. 766-778.
- 742 52. A. Shevchenko, M. Wilm, O. Vorm, M. Mann, Mass Spectrometric Sequencing of  
743 Proteins from Silver-Stained Polyacrylamide Gels. *Analytical Chemistry* **68**, 850-858  
744 (1996).
- 745 53. M. Angeleri, D. Muth-Pawlak, E. M. Aro, N. Battchikova, Study of O-Phosphorylation  
746 Sites in Proteins Involved in Photosynthesis-Related Processes in *Synechocystis* sp.  
747 Strain PCC 6803: Application of the SRM Approach. *J Proteome Res* **15**, 4638-4652  
748 (2016).
- 749 54. O. Reinholdt *et al.*, Redox-Regulation of Photorespiration through Mitochondrial  
750 Thioredoxin o1. *Plant Physiology* **181**, 442 (2019).
- 751 55. M. M. Bradford, A rapid and sensitive method for the quantitation of microgram  
752 quantities of protein utilizing the principle of protein-dye binding. *Analytical*  
753 *Biochemistry* **72**, 248-254 (1976).

754

## Supplementary Information

### Pyruvate:ferredoxin oxidoreductase and low abundant ferredoxins support aerobic photomixotrophic growth in cyanobacteria

Yingying Wang<sup>a</sup>, Xi Chen<sup>a</sup>, Katharina Spengler<sup>a</sup>, Karoline Terberger<sup>a</sup>, Marko Boehm<sup>a,b</sup>, Jens Appel<sup>a,b</sup>, Thomas Barske<sup>c</sup>, Stefan Timm<sup>c</sup>, Natalia Battchikova<sup>d</sup>, Martin Hagemann<sup>c</sup>, Kirstin Gutekunst<sup>a,b</sup>

kirstin.gutekunst@uni-kassel.de

<sup>a</sup>Department of Biology, Botanical Institute, Christian-Albrechts-University, D-24118 Kiel, Germany; <sup>b</sup>Department of Molecular Plant Physiology, Bioenergetics in Photoautotrophs, University of Kassel, D-34132 Kassel, Germany, <sup>c</sup>Plant Physiology Department, University of Rostock, D-18059 Rostock, Germany, <sup>d</sup>Department of Biochemistry, Molecular Plant Biology, University of Turku, FI-20014 Turku, Finland

S1: Bioinformatic analyses concerning the distribution of PDH complex and PFOR in cyanobacteria  
S2: Oxygen concentrations in photomixotrophic cultures of WT and  $\Delta pfor$   
S3: RT-PCR on *pfor* and *pdhA* in the WT under photoautotrophic and photomixotrophic conditions  
S4: Growth of serine/threonine protein kinase (*spk*) deletion mutants  
S5: Extract of the sequence alignment of PdhA subunit and sequence logo  
S6: Sequence alignment of 932 cyanobacterial PdhA sequences  
S7: Antibody against the PdhA subunit of the PDH complex  
S8: Immunoblot with an antibody against the E1 subunit of PdhA of the PDH complex  
S9: SDS PAGE analysis followed by immunoblotting of *Synechocystis* overexpressing PFOR  
S10: Large-scale PFOR purification  
S11: Examination of segregation of deletion mutants via PCR or Southern blot  
S12: Photoautotrophic growth of ferredoxin deletion mutants  
Table S1: List of primers used in this study to generate deletion strains and for RT-PCR  
Table S2: List of *Synechocystis* strains and mutants used in this study  
Table S3: Peptides of the alpha subunit of the pyruvate dehydrogenase (Slr1934) E1 component detected via MS/MS in band No. 1 of Fig. S8

diazotrophic (with N<sub>2</sub>ase)      non-diazotrophic (without N<sub>2</sub>ase)

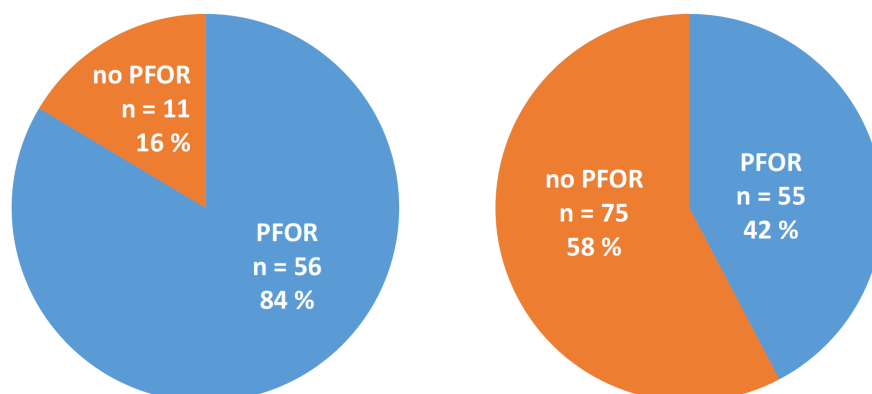

Figure S1: Bioinformatic analyses concerning the distribution of PDH complex and PFOR in diazotrophic and non-diazotrophic cyanobacteria. All shown genomes possess a PDH complex.

All completely sequenced cyanobacterial genomes were analyzed via tblastn for the presence of the PDH complex and PFOR. For this, in order to exclude symbionts, cyanobacterial genomes were in a first step searched for the *psbD* gene (PSII subunit). We used the *psbD* gene (*sl10849*) of *Synechcoystis* as bait. Only genomes containing *psaD* were used for all further analysis. 197 genomes remained and were searched by tblastn using the *pdhA* subunit (*slr1934*) from the PDH complex from *Synechcoystis* as bait. The largest expect value was  $2 \times 10^{-136}$ . *pdhA* was found in all genomes analyzed. 67 of these genomes contain *nifD* (highest e-value  $4 \times 10^{-104}$ ) and *nifK* (highest e-value  $1 \times 10^{-73}$ ), the two subunits of the nitrogenase for N<sub>2</sub>-fixation and a diazotrophic lifestyle. Diazotrophic and non-diazotrophic cyanobacteria were searched for the presence of PFOR by using *sl10741* from *Synechcoystis*. The highest e-value in this case was 0.

We found that all fully sequenced diazotrophic and non-diazotrophic cyanobacteria with PSII contain genes coding for a PDH complex and that 56 % thereof possess a PFOR as well. If we subtract from this group all diazotrophic cyanobacteria that contain a nitrogenase and might therefore utilize PFOR in the process of nitrogen fixation, 130 non-diazotrophic cyanobacteria remain. Within the group of non-diazotrophic cyanobacteria 42% possess a PFOR in addition to the PDH complex. This clearly shows that the property of holding both a PDH complex and a PFOR in cyanobacteria that live predominantly under oxic conditions is truly widespread. The analysis furthermore confirms our observation, that the PDH complex is preferred over the utilization of PFOR in cyanobacteria.

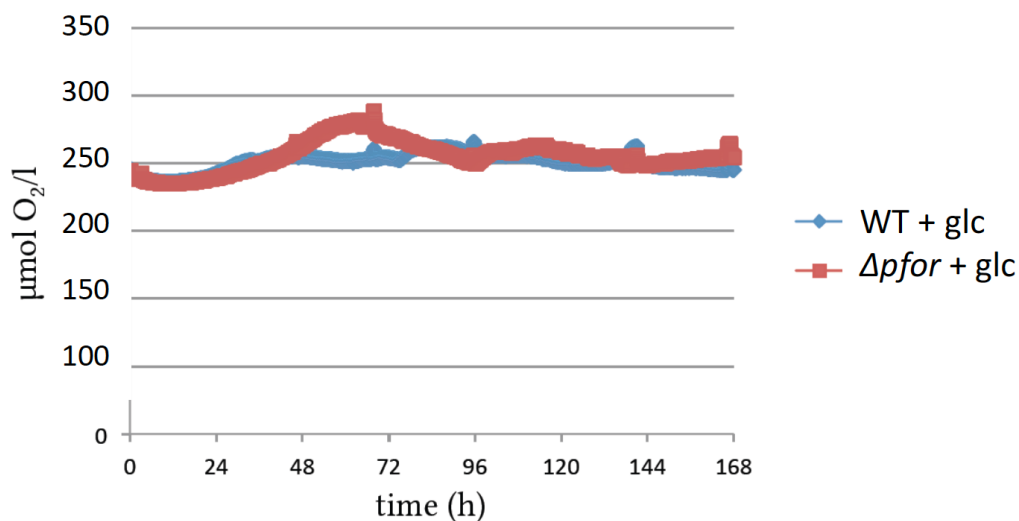

Figure S2: Oxygen concentrations in photomixotrophic cultures of wild type (WT) and  $\Delta pfor$  were close to oxygen saturation throughout the growth experiments. Original traces are shown.

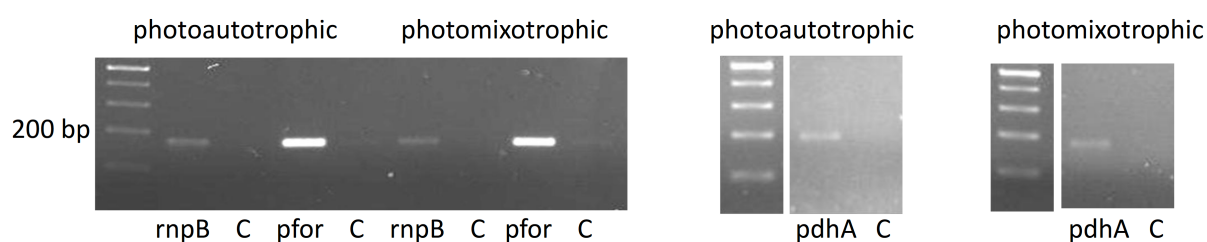

Figure S3: RT-PCR showing that *pfor* and *pdhA* are transcribed under photoautotrophic and photomixotrophic conditions in the wild type. Total RNA of wild type cells was reverse transcribed and subsequently subjected to PCRs with either primers specific for *rnpB*, *pfor* or *pdhA* (table S1). In the control reactions (C) reverse transcriptase was omitted.

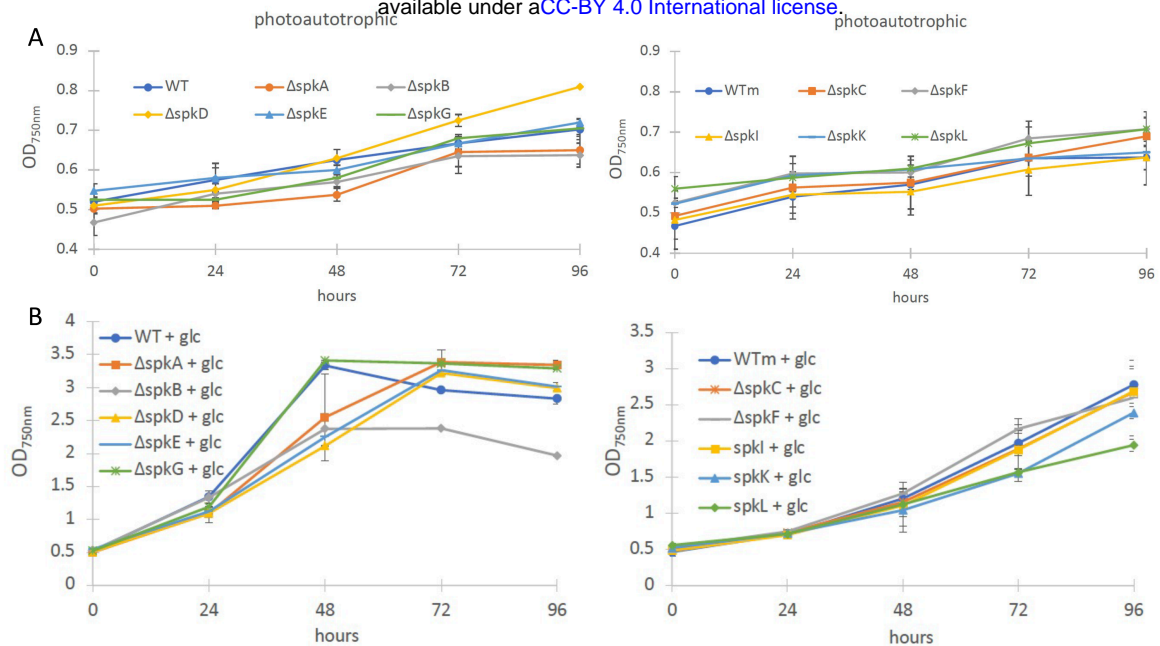

Figure S4: (A) Photoautotrophic and (B) photomixotrophic growth of serine/threonine protein kinase (*spk*) deletion mutants. The mutants were constructed in different *Synechocystis* WT backgrounds (table S2). *spkA*, *spkB*, *spkD*, *spkE* and *spkG* were deleted in the non-motile GT strain as all other mutants in this study with exception of *spkC*, *spkF*, *spkI*, *spkK*, and *spkL* that were deleted in the motile strain indicated as WTm. Shown are mean values  $\pm$  SD from at least 3 replicates.

Photoautotrophic and photomixotrophic growth of ten serine/threonine protein kinase (*spk*) deletion mutants was analyzed. They grew like the WT under photoautotrophic conditions (Fig. S4A) whereas the growth of  $\Delta spkB$  and  $\Delta spkL$  was affected under photomixotrophic conditions (Fig. S4B). This indicates that phosphorylation of enzymes is relevant for optimal photomixotrophic growth in *Synechocystis*.



A

```

N7120   FRGHSLADP--DEMRSKAEKEFWFSRDPIKKLAALIEQNLADEAELKAIERKIQDVIDD
O6506   FRGHSLADP--DELRSKEEKEKYWFPRDPIKKLAADLTERNLATVEELKEIEQKIQALVDD
L8106   FRGHSLADP--DELRDQEEKDFWFSRDPIKKLANYLIEKNLASAEQLKEIDHKIQAVVDD
S7942   FRGHSLADP--DELRSKEEKEFWLARDPIKRFAAHLTEFNLATHEELKAIDKKIEALVAE
S6803   FRGHSLADP--DELRSAEEKQFWAARDPIKKFAAFMTEHELASNEELKAIDKRIQEVIDD
Gviol   FRGHSLADP--DELRDPAEKEFWRKQDPIPRLAAFVREQELASAELKAIDQEIRAEIDD
Btaurus YHGHSMSDPGVSYRTREEIQEVRSKSDPIMLLKDRMVNSNLASVEELKEIDVEVRKEIED
Rnorveg YHGHSMSDPGVSYRTREEIQEVRSKSDPIMLLKDRMVNSNLASVEELKEIDVEVRKEIED
Hsapiens YHGHSMSDPGVSYRTREEIQEVRSKRDPIILQDRMVNSKLATVEELKEIGAEVRKEIDD
      ::***::** .      ::      *** : : : ** :** * ... : :

```

B

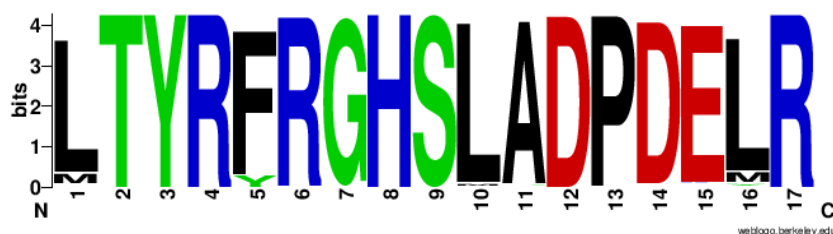

Figure S5: (A) Extract of the sequence alignment with the E1 subunits of the PDH complex. Shown are cyanobacterial sequences of *Nostoc* sp. PCC 7120 (N7120), *Oscillatoria* sp. PCC 6506 (O6506), *Lynbya* sp. PCC 8106 (L8106), *Synechococcus* sp. PCC 7942 (S7942), *Gloeobacter violaceus* (Gviol), and *Synechocystis* sp. PCC 6803 (S6803), and eukaryotic sequences of cattle (*Bos taurus* (Btaurus)), rat (*Rattus norvegicus* (Rnorveg)) and human (*Homo sapiens* (Hsapiens)). Serine residue 1 (S), is conserved in all PdhAs whereas residues 2 (S) and 3 (S), are only found in the eukaryotes. The first serine residue (S) was found in all 932 cyanobacterial PdhA sequences extracted from Genbank by a blast search as of January 11<sup>th</sup> 2021 (Fig. S5). (B) Sequence logo of 17 amino acids around serine residue 1 from 932 cyanobacterial *pdhA* sequences showing that this region is highly conserved. The logo was generated via <https://weblogo.berkeley.edu/logo.cgi>.

Figure S6: Sequence alignment by ClustalW of 932 cyanobacterial PdhA sequences extracted from Genbank by a blast search on January 11<sup>th</sup> 2021. The region containing the conserved serine residue (marked in red) is shown.

Alignment of cyanobacterial PdhA Sequences (only the part around the conserved serine residue (S) is shown)

```
NER82895.1      RTYRYKGHSMSDPKAYRTKEEVESYK-QRDPVEQVKATILKKK-----LASEAELAKID
MBC7866741.1   KTYRYKGHSMSDPQKYRTKEELEAYK-EKDPIEHVLKVLRTDY-----KVSDAEIEVMT
NET36155.1      RTYRYKGHSSDPARYRTKEEVQEQYK-DKDPVKMTEAKILKDK-----IATAEEIAAIK
WP_099077406.1 KTYRYRGHSMSDAQHYRTKEEVEEYR-KIDPIIQVLDI IKENN-----YATEAEIEAID
WP_110151329.1 KTYRYRGHSMSDPKAYRSRDEVQAVRDKSDPIEGLKR-ELEAA-----GVSEADLKTIE
WP_110154872.1 KTYRYRGHSMSDPKAYRTREEVQAMKDSDCIDHAKR-ELEAM-----GVSEDELKKID
WP_162547839.1 LTYRYRGHSMSDPKAYRSKEEVQKMRSEQDPIEQVRARLLEKG-----WATEDELKAID
WP_162544581.1 VTYRYRGHSMSDPKAYRSKEEVDVDRMRGEHDPIDQVRSRLLENG-----WATEDDLKGLD
WP_110150063.1 LTYRYRGHSMSDPKAYRTKDEVTKYRQERDPIEQVRARLLEAG-----VVTEDDLKKIE
WP_017290656.1 VTYRFRAHSMFDPPELYRDKAEEVEEWK-QRCP ISTLTQQLKAQG-----QITDADVERIE
WP_190651747.1 VTYRFRAHSMFDPPELYRDKAEEVEEWK-QRCP ISTLTQQLKAQG-----QITDADVERME
WP_190573087.1 TTYRFRAHSMFDAELYREKAEEVEQWK-QRCP IATLTQQLKEQE-----KISDADLEAME
WP_190936745.1 ITYRFRAHSMFDAELYRDKAEEVELWK-QRCP IETFAKRLQEQQ-----LLSDTEWEAME
BAZ39299.1      VTYRFRAHSMFDPPEFYREKTEVEQWK-QRCP IEMLTTKLLEQQ-----LLSGVELAAME
HFN00591.1     ITYRFRAHSMFDPPEFYREKAEEVEQWR-ERCP INTLFTKIQEKG-----WLSDTEWNLN
HBC42436.1     RTYRFRAHSMFDAELYRDKKEVEEWEK-QRCP IATLTQQLKAQG-----LLSDQDLVTMK
WP_190401563.1 VTYRFRAHSMFDAELYRDKAEEVEQWR-QRCP IANLTQQLKAQG-----LLSDADLTAMQ
HBN08467.1     LTYRFRGHSMADPELYRNKAEEVEEWK-KRDP IPRFLEGCLANK-----LLSREDADRIS
HDW98853.1     ITYRFRGHSLADPDELRSPPEEKEFWR-QRDP IKQLERYALEHN-----LMTEADFQAIH
WP_011431966.1 ITYRFRGHSLADPDELRSPPEEKEFWR-QRDP IKQLERYALEHN-----LMTEADFQAIH
WP_099812446.1 LTYRFRGHSLADPDELRSPPEEKEFWR-QRDP IKRLERYALEHN-----LMTEADFQAIQ
WP_011429423.1 ITYRFRGHSLADPDELRSPPEEKEFWR-QRDP IKRLERYALEHN-----LMTEADFQAIQ
NJL98069.1     MTYRFRGHSLADPDELRDPQEKEFWR-KQDP IKQLERYGLEHN-----LTKADCQEIQ
NJK62068.1     ITYRFRGHSLADPDELRQPEDKEFWR-QRDP LKSLERYALEHA-----LVSEAEFQHIQ
WP_026101161.1 MTYRFRGHSLADPDELREVEEKEFWR-QQDP IKAFERYALEHE-----LMAQAELEDEIS
BAC89470.1     TTYRFRGHSLADPDELRDPAEKEFWR-KQDP IPRLAAFVREQE-----LASAEELKAID
WP_164928801.1 TTYRFRGHSLADPDELRDPAEKEFWR-KQDP IPRLAAFVREQE-----LASAEELKAID
WP_011142838.1 TTYRFRGHSLADPDELRDPAEKAHWR-KQDPLPRLRVWLEEQQ-----LASVEDLKRIE
WP_023173177.1 TTYRFRGHSLADPDELRDPAEKEFWR-QQDP IPRLAAFIAEQG-----FAGPDELKLID
HGZ85391.1     NTYRFRGHSLADPDELRDPAEKEFWR-KQDP IPKLSYIVSND-----LASEAELKLEIE
MBD1195191.1   LTYRFRGHSLADPDELRRAEAEKEFWA-QRDP IKRLAAHLIEHN-----LANAEELKGDID
WP_010310573.1 LTYRFRGHSLADPDELRRAEAEKEFWA-QRDP IKRLAAHLIEHN-----LATADELKGLIE
WP_010315614.1 LTYRFRGHSLADPDELRRAEAEKEFWA-QRDP IKRLAAHLIEHN-----LATTEELKGLIE
PWL22038.1     LTYRFRGHSLADPDELRRAEAEKEFWA-QRDP IKRLAAHLIEHN-----LATAEELKGLIE
WP_185187231.1 LTYRFRGHSLADPDELRRAEAEKEFWA-QRDP IKRLAAHLIEQN-----LATADELKAIE
GDx71957.1     LTYRFRGHSLADPDELRRAEAEKEFWA-QRDP IKRLAAHLIEHN-----LANADELKAID
NDF62096.1     LTYRFRGHSLADPDELRRAEAEKEFWA-QRDP IKRLAAHLIEHN-----LANADELKAID
NBW63180.1     LTYRFRGHSLADPDELRRAEAEKEFWA-QRDP IKRLGAQLIERG-----LATADDLKQID
NDG75008.1     LTYRFRGHSLADPDELRRAEAEKEFWA-QRDP IKRLGAHLIEHN-----LATAEELKAIE
WP_094588615.1 LTYRFRGHSLADPDELRRAEAEKEFWA-QRDP IKRLGAHLIEQN-----LATAEELKAIE
WP_094560219.1 LTYRFRGHSLADPDELRRAEAEKEFWA-KRDP IKALAARLIEQG-----LASGEELKAIE
WP_190389986.1 LTYRFRGHSLADPDELRRAEAEKEFWA-KRDP IKALGSRLIEQG-----LATAEELKAIE
WP_197153330.1 LTYRFRGHSLADPDELRRAEAEKEFWA-KRDP IKALAVRLIEQN-----LASAEELKAIE
WP_106502205.1 LTYRFRGHSLADPDELREEAEKEFWA-KRDP IKSLASRLIEQG-----LTTAEELKSIE
WP_186699049.1 LTYRYRGHSLADPDELRRAEAEKAFWA-KRDP IKRLGAQLVEQQ-----LATAEELKAIE
WP_193915991.1 LTYRYRGHSLADPDELRRAEAEKAFWA-KRDP IKRLGGQLLEQQ-----LATAEELKAIE
WP_193815924.1 LTYRYRGHSLADPDELRRAEAEKAFWA-KRDP IKRLGGQLVEQQ-----LATAEELKAIE
QNI69975.1     LTYRYRGHSLADPDELRRAEAEKAFWA-KRDP IKRLGAQLVEQQ-----LATAEELKAIE
WP_006909495.1 LTYRYRGHSLADPDELRRAEAEKEFWA-KRDP IKRLAASLVEQG-----LATADELKAID
WP_087068638.1 LTYRYRGHSLADPDELRRAEAEKEFWA-KRDP INRLAAHLVEQG-----LASADELKAID
NDC35000.1     LTYRYRGHSLADPDELRRAEAEKEFWA-KRDP IKRLAAQLVSQS-----LASAELEAID
NDC14028.1     LTYRFRGHSLADPDELRRAEAEKEFWA-KRDP IKQLAAHLVAQN-----LATPEELKAID
WP_048017862.1 LTYRYRGHSLADPDELRQAQAEKDFWA-QRDP IKRLAAHLVEHG-----LVAAEELKAID
TVS06357.1     LTYRYRGHSLADPDELREQAQAEKEFWA-KRDP IKGLAAHLIEQN-----LATADELKAID
NBR45324.1     LTYRFRGHSLADPDELRDPEEKAFWA-QRDP IKQFSALLLNQG-----KATAEDLAAID
NBP32852.1     LTYRFRGHSLADPDELRDPEEKAFWA-QRDP IKQFSALLLNQG-----KATAEDLAAID
NBP98431.1     LTYRFRGHSLADPDELRDPEEKAFWA-QRDP IKQFSALLLNQG-----KATAEDLAAID
NBQ20070.1     LTYRFRGHSLADPDELRDPEEKAFWA-QRDP IKQFSALLLNQG-----KATAEDLAAID
NBO29789.1     LTYRFRGHSLADPDELRDPEEKAFWA-QRDP IKQFSALLLNQG-----KATAEDLAAID
OON11472.1     LTYRFRGHSLADPDELRDPEEKAFWA-QRDP IKQFSALLLNQG-----KATAEDLAAID
```

NBV59412.1 LTYRFRGHSLADPDELRDPEEKAFWA-QRDPKQFSAEVMVSRD-----LNQG-----KATAEDLAAID  
WP\_106499614.1 LTYRFRGHSLADPDELRDPEEKAFWA-QRDPKQFSAEVMVSRD-----XATAXDLAAID  
MBJ7364777.1 LTYRFRGHSLADPDELRDPEEKAFWT-NRDPKQFSAFMQQQG-----LASAADLADID  
NDC15673.1 LTYRFRGHSLADPDELRDPEEKAFWA-ARDPIKHLAGLQSRG-----LATAEDLETID  
NBQ22110.1 LTYRFRGHSLADPDELRDPEEKAFWA-ARDPIKHLAGLQSRG-----LATAEDLETID  
WP\_197725975.1 LTYRFRGHSLADPDELRDPEEKAFWA-ARDPIKHLAGVLSRG-----LATAADLEAIE  
WP\_180664702.1 LTYRFRGHSLADPDELRDPEEKAFWA-ARDPIKHLAGVLSRG-----LATAADLEAIE  
WP\_180651812.1 LTYRFRGHSLADPDELRDPEEKAFWA-ARDPIKHLAGVLSRG-----LATAADLEAIE  
WP\_181466413.1 LTYRFRGHSLADPDELRDPEEKAFWA-ARDPIKHLAGVLSRG-----LATAADLEAIE  
OUT70434.1 MTYRFRGHSLADPDELRDPEEKAFWA-ERDPIKAFSAEVMVSRD-----LLSPEEMAAID  
RCL54587.1 MTYRFRGHSLADPDELRDPEEKAFWA-ERDPIKGFSAEVMVSRG-----LLSAEEMAAID  
RPF75188.1 MTYRFRGHSLADPDELRDPEEKAFWA-ERDPIKGFSAEVMVSRG-----LLSAEEMAAID  
OUW38983.1 MTYRFRGHSLADPDELRDPEEKAFWA-ERDPIKGFQATMHARG-----LLSAEEMAAID  
WP\_011936122.1 MTYRFRGHSLADPDELRDPEEKAFWA-ERDPIKGFQATMHARG-----LLSAEEMAAID  
NBQ37607.1 MTYRFRGHSLADPDELRDPEEKAFWA-ERDPIKGFQATMHARG-----LLSAEEMAAID  
PZV21699.1 LTYRFRGHSLADPDELRSAAEKDFWA-QRDPKALAAHLTSHG-----LASADELKEIE  
WP\_094514657.1 LTYRFRGHSLADPDELRSAAEKDFWA-QRDPKALAAHLTSHG-----LASADELKEIE  
WP\_197162892.1 LTYRFRGHSLADPDELRSAAEKDFWA-KRDPKALAAHLTSHD-----LASSSELKAIE  
WP\_006171785.1 LTYRFRGHSLADPDELRSAAEKDFWA-KRDPKALAAHLTSHD-----LASSSELKAIE  
WP\_185464938.1 LTYRFRGHSLADPDELRSAAEKDFWA-KRDPKALAAHLTSHG-----LATAEELKAIE  
WP\_094554638.1 LTYRFRGHSLADPDELRSAAEKDFWA-KRDPKALATHLTSHG-----LASSSELKAIE  
WP\_197153832.1 LTYRFRGHSLADPDELRSAAEKDFWA-QRDPKQLAHLTSQG-----LASGDDLKAIE  
WP\_197169642.1 LTYRFRGHSLADPDELRSAAEKDFWA-QRDPKQLAHLTSQG-----LASGDDLKAIE  
PHX87613.1 LTYRFRGHSLADPDELRSAAEKDFWA-QRDPKQLAGHLLAQG-----LASEADLKAIE  
MBJ7492800.1 LTYRFRGHSLADPDELRSAAEKDFWA-QRDPKQLAGHLLAQG-----LASEADLKAIE  
WP\_094587424.1 LTYRFRGHSLADPDELRSAAEKDFWA-KRDPKQLAGRLVEEG-----LAAAELKEID  
WP\_190611115.1 LTYRFRGHSLADPDELRSAAEKDFWA-KRDPKQLAGRLVEEG-----LAAAELKEID  
WP\_190544577.1 LTYRFRGHSLADPDELRSAAEKDFWA-KRDPKQLAGRLVEEG-----LAAAELKEID  
WP\_015108816.1 LTYRFRGHSLADPDELRSAAEKDFWA-KRDPKQLAGRLVEEG-----LAAAELKEID  
WP\_106220728.1 LTYRFRGHSLADPDELRSAAEKDFWA-KRDPKQLAARLDIQG-----LATAEELKEID  
WP\_159816067.1 LTYRFRGHSLADPDELRSAAEKDFWA-KRDPKQLAARLDIQG-----LATAEELKEID  
KEF42988.1 LTYRFRGHSLADPDELRSAAEKDFWA-KRDPKQLAARLIAMN-----LATAKELKEID  
GDX75696.1 LTYRFRGHSLADPDELRSAAEKDFWA-QRDPKRLAADLISAG-----LVSEAEELKEIE  
WP\_197212572.1 LTYRFRGHSLADPDELRSAAEKDFWA-KRDPKQLAARLTADG-----LASEAEELKEID  
PZU96658.1 LTYRFRGHSLADPDELRSAAEKDFWA-QRDPKALAGQLISAE-----LATAEELKAIE  
PZV02932.1 LTYRFRGHSLADPDELRSAAEKDFWA-QRDPKALAGQLISAE-----LATAEELKAIE  
WP\_071801427.1 LTYRFRGHSLADPDELRSAAEKDFWA-QRDPKALAAQLISGE-----LATAEELKAIE  
WP\_043696173.1 LTYRFRGHSLADPDELRSAAEKDFWA-ERDPLKALERDLGAG-----LVQSDELRAIE  
OUW68062.1 LTYRFRGHSLADPDELRSAAEKDFWA-ERXPLKALERDLGAG-----LVQSDELRAIE  
WP\_186485172.1 LTYRFRGHSLADPDELRSAAEKDFWA-ERDPLKALERDLGAG-----LVQSDELRAIE  
WP\_041425471.1 LTYRFRGHSLADPDELRSAAEKDFWA-KRDPKALERDLTEAG-----LVTSDELRGIE  
ABB26477.1 LTYRFRGHSLADPDELRSAAEKDFWA-KRDPKALERDLTEAG-----LVTSDELRGIE  
WP\_037988804.1 LTYRFRGHSLADPDELRSAAEKDFWA-KRDPKALERDLTEAG-----LVTSDELRGIE  
EAU70620.1 LTYRFRGHSLADPDELRSAAEKDFWA-KRDPKALERDLTEAG-----LVTSDELRGIE  
MBE67365.1 LTYRFRGHSLADPDELRSAAEKDFWA-KRDPKALERDLTEAG-----LVSSDELRAIE  
MAV11884.1 LTYRFRGHSLADPDELRSAAEKDFWA-QRDPKAMERDLCQSQ-----LVSPDELRAIE  
MAV12853.1 LTYRFRGHSLADPDELRSAAEKDFWA-QRDPKAMERDLCQSQ-----LVSPDELRAIE  
WP\_186586329.1 LTYRFRGHSLADPDELRSAAEKDFWA-QRDPKALERDLNAN-----LVSSDELRSIE  
MBA4732986.1 LTYRFRGHSLADPDELRSAAEKDFWA-QRDPKALERDLNAN-----LVSSDELRSIE  
WP\_011128484.1 LTYRFRGHSLADPDELRSAAEKDFWA-QRDPKALERDLCEAN-----LVSSDELRSIE  
WP\_186511662.1 LTYRFRGHSLADPDELRSAAEKDFWA-QRDPKALERDLCEAN-----LVSSDELRSIE  
WP\_186481880.1 LTYRFRGHSLADPDELRSAAEKDFWT-QRDPKALERDLCEAN-----LVSSDELRSIE  
WP\_186496693.1 LTYRFRGHSLADPDELRSAAEKDFWA-ERDPIKALERDLCEAN-----LVSSDELRSIE  
QNI92122.1 LTYRFRGHSLADPDELRSAAEKDFWA-QRDPKALERDLCEAN-----LVSSDELRSIE  
QNI51575.1 LTYRFRGHSLADPDELRSAAEKDFWA-QRDPKALERDLCEAN-----LVSSDELRSIE  
QNJ14498.1 LTYRFRGHSLADPDELRSAAEKDFWT-QRDPKALERDLCEAN-----LVSSDELRSIE  
QNI42770.1 LTYRFRGHSLADPDELRSAAEKDFWA-QRDPKALERDLNAN-----LVSSDELRSIE  
WP\_186542049.1 LTYRFRGHSLADPDELRSAAEKDFWA-KRDPKALERDLTQAG-----LVNSEELRAIE  
WP\_114988422.1 LTYRFRGHSLADPDELRSAAEKDFWA-KRDPKALERDLTQAG-----LVNSEELRAIE  
WP\_186508997.1 LTYRFRGHSLADPDELRSAAEKDFWA-KRDPKALERDLTQAG-----LVNSEELRAIE  
WP\_115132999.1 LTYRFRGHSLADPDELRSAAEKDFWA-KRDPKALERDLTQAG-----LVNSEELRAIE  
WP\_115008758.1 LTYRFRGHSLADPDELRSAAEKDFWA-KRDPKALERDLTQAG-----LVKSEELRAIE  
WP\_186495702.1 LTYRFRGHSLADPDELRSAAEKDFWA-KRDPKALERDLTEAG-----LVNSEELRAIE  
WP\_115081976.1 LTYRFRGHSLADPDELRSAAEKDFWA-KRDPKALERDLTEAS-----LVNSEELRAIE  
MBN89045.1 LTYRFRGHSLADPDELRSAAEKDFWA-KRDPKALERDLTXAG-----LVNSXXLRAXE  
WP\_186571723.1 LTYRFRGHSLADPDELRSAAEKDFWA-KRDPKALERDLTDAG-----LVNSDELRAIE  
WP\_115092889.1 LTYRFRGHSLADPDELRSAAEKDFWA-KRDPKALERDLTDAG-----LVNSDELRAIE  
WP\_166016785.1 LTYRFRGHSLADPDELRSAAEKDFWA-KRDPKALERDLTDG-----LVNSDELRAIE  
WP\_115023735.1 LTYRFRGHSLADPDELRSAAEKDFWA-KRDPKALERDLTDG-----LVNSDELRAIE

MBA4736711.1 LTYRFRGHSLADPDELRAEEEEKQFWA-KRDPLKGLERDLTEAG-----LVSSDELRAIE  
WP\_038557300.1 LTYRFRGHSLADPDELRAEEEEKQFWA-KRDPLKGLERDLTEAG-----LVNSDELRAIE  
AII49956.1 LTYRFRGHSLADPDELRAEEEEKQFWA-KRDPLKGLERDLTEAG-----LVNSDELRAIE  
WP\_025362400.1 LTYRFRGHSLADPDELRAEEEEKQFWA-KRDPLKALERDLTEAG-----LVNSEELRAIE  
WP\_041434499.1 LTYRFRGHSLADPDELRAEEEEKLFWA-KRDPLKALERDLTEAG-----LVNSDELRAIE  
ABB34648.1 LTYRFRGHSLADPDELRAEEEEKLFWA-KRDPLKALERDLTEAG-----LVNSDELRAIE  
WP\_186494888.1 LTYRFRGHSLADPDELRAEEEEKQFWA-KRDPLKALERDLTEAG-----LVNSDELRAIE  
WP\_186514981.1 LTYRFRGHSLADPDELRAEEEEKQFWA-KRDPLKALERDLTEAG-----LVSSDELRAIE  
QNI99748.1 LTYRFRGHSLADPDELRAEEEEKQFWA-KRDPLKALERDLTEAG-----LVNSDELRAIE  
QNI63881.1 LTYRFRGHSLADPDELRAEEEEKQFWA-KRDPLKALERDLTEAG-----LVSSDELRAIE  
QNI81749.1 LTYRFRGHSLADPDELRAEEEEKQFWA-KRDPLKALERDLTQAG-----LVNSEELRAIE  
QNJ10957.1 LTYRFRGHSLADPDELRAEEEEKQFWA-KRDPLKALERDLTQAG-----LVNSEELRAIE  
QNI62062.1 LTYRFRGHSLADPDELRAEEEEKQFWA-KRDPLKALERDLTEAG-----LVNSEELRAIE  
MAI96686.1 LTYRFRGHSLADPDELRAEEEEKQFWA-KRDPLKALERDLTEPG-----LVRAEELRSIE  
WP\_038545717.1 LTYRFRGHSLADPDELRSQEKEQFWA-QRDPLKAFENDLVSAG-----MVSADDELRAIE  
AII44015.1 LTYRFRGHSLADPDELRSQEKEQFWA-QRDPLKAFENDLVSAG-----MVSADDELRAIE  
WP\_028952470.1 LTYRFRGHSLADPDELRSQEKEQFWA-QRDPLKAFERDLVSAD-----LVSSDELRAIE  
MAR06916.1 LTYRFRGHSLADPDELRSQEKEQFWA-KRDPLKALERDLTQAG-----LVNSAEELRAIE  
MAV10744.1 LTYRFRGHSLADPDELRSSEDEKQFWA-QRDPLKQFERDLTDAG-----LATGEELRAIE  
MAH57385.1 LTYRFRGHSLADPDELRAEEEEKQFWA-KRDPLKALEKDLTEAG-----LASSDELRGIE  
WP\_186583024.1 LTYRFRGHSLADPDELRAEEEEKQFWA-KRDPLKALERDLLAAN-----LVSAEELRAIE  
OUX72890.1 LTYRFRGHSLADPDELRAEXEKQFWA-KRDPLKALERDLLAAN-----LVSAEELRAIE  
WP\_186594678.1 LTYRFRGHSLADPDELRAEEEEKQFWA-KRDPLKALERDLLAAN-----LVSAEELRAIE  
WP\_011933632.1 LTYRFRGHSLADPDELRAEEEEKQFWA-KRDPLKALERDLLAAN-----LVSADELRAIE  
QNI68134.1 LTYRFRGHSLADPDELRAEEEEKQFWA-KRDPLKALERDLLAAN-----LVSADELRAIE  
WP\_006041926.1 LTYRFRGHSLADPDELRAEEEEKQFWA-KRDPLKALERELEAN-----LVTAEELRAIE  
WP\_130128599.1 LTYRFRGHSLADPDELRAEAEKQFWA-QRDPLKALERDLVAAG-----LVTSDDLRAIE  
WP\_007100389.1 LTYRFRGHSLADPDELRAEAEKQFWA-QRDPLKALERDLVTAG-----LVTSDDLRAIE  
WP\_131456226.1 LTYRFRGHSLADPDELRAEEEEKQFWA-QRDPLKALERDLVGAG-----LASSDELRAIE  
WP\_186469284.1 LTYRFRGHSLADPDELRAEEEEKQFWA-KRDPLKALERDLVGAG-----LVSADDLRAIE  
MAN19309.1 LTYRFRGHSLADPDELRAEEEEKQFWA-KRDPLKALERDLVGAG-----LVSADDLRAIE  
WP\_186500504.1 LTYRFRGHSLADPDELRAEEEEKQFWA-KRDPLKALERDLVGAG-----LVSADDLRAIE  
WP\_186480809.1 LTYRFRGHSLADPDELRAEEEEKQFWA-KRDPLKALERDLVGAG-----LVSADDLRAIE  
QNI72826.1 LTYRFRGHSLADPDELRAEEEEKQFWA-KRDPLKALERDLVGAG-----LVSADDLRAIE  
QNI49148.1 LTYRFRGHSLADPDELRAEEEEKQFWA-KRDPLKALERDLVGAG-----LVSADDLRAIE  
WP\_114994065.1 LTYRFRGHSLADPDELRAEEEEKQFWA-KRDPLKALERDLVGS-----LTSSEDLRAIE  
WP\_066906878.1 LTYRFRGHSLADPDELRAEEEEKQFWA-KRDPLKALERDLVGS-----LTSSEDLRAIE  
WP\_186990744.1 LTYRFRGHSLADPDELRAEEEEKQFWA-KRDPLKALERDLVGS-----LTSSEDLRAIE  
WP\_115125273.1 LTYRFRGHSLADPDELRAEEEEKQFWA-KRDPLKALERDLVGS-----LTSSEDLRAIE  
WP\_067094249.1 LTYRFRGHSLADPDELRAEEEEKQFWA-KRDPLKALERDLVSS-----LTS SQDLRAIE  
MAF41349.1 LTYRFRGHSLADPDELRAEEEEKQFWA-KRDPLKALERDLVGS-----LTSSEDLRAIE  
WP\_186492118.1 LTYRFRGHSLADPDELRAEEEEKQFWA-KRDPLKALERDLVGT-----LTNSEDRAIE  
MAD67846.1 LTYRFRGHSLADPDELRAEEEEKQFWA-KRDPLKALERDLVGT-----LTNSEDRAIE  
QNJ22073.1 LTYRFRGHSLADPDELRAEEEEKQFWA-KRDPLKALERDLVGS-----LTSSEDLRAIE  
WP\_186545267.1 LTYRFRGHSLADPDELRAEEEEKQFWA-KRDPLKAFERDLVGE-----LVSADELRAIE  
WP\_006854596.1 LTYRFRGHSLADPDELRAEEEEKQFWA-KRDPLKAFERDLVGE-----LVSADELRAIE  
WP\_048346005.1 LTYRFRGHSLADPDELRAEEEEKQFWA-KRDPLKAFERDLVGE-----LVSADELRAIE  
NCG16233.1 LTYRFRGHSLADPDELRAEEEEKQFWA-KRDPLKAFERDLVSD-----LVNADELRAIE  
WP\_186524841.1 LTYRFRGHSLADPDELRAEEEEKQFWA-KRDPLKAFERDLVSD-----LVNADELRAIE  
WP\_186590036.1 LTYRFRGHSLADPDELRAEEEEKQFWA-KRDPLKAFERDLVSD-----LVHADELRAIE  
WP\_186518446.1 LTYRFRGHSLADPDELRAEEEEKQFWA-KRDPLKAFERDLVSD-----LVSADELRAIE  
RPF75398.1 LTYRFRGHSLADPDELRAEEEEKQFWA-KRDPLKAFERDLVSD-----LVSADELRAIE  
WP\_011618705.1 LTYRFRGHSLADPDELRAEEEEKQFWA-KRDPLKAFERDLVSD-----LVSADELRAIE  
MAK15883.1 LTYRFRGHSLADPDELRAEEEEKQFWA-KRDPLKAFERDLVSD-----LVSADELRAIE  
MBT65798.1 LTYRFRGHSLADPDELRAEEEEKQFWA-KRDPLKAFERDLISD-----LVRADDELRAIE  
OUW46225.1 LTYRFRGHSLADPDELRAEEEEKQFWA-QRDPLKALERDLVSAG-----MVSSEELRAIE  
MAS27149.1 LTYRFRGHSLAXPDELRAEEEEKQFWA-QRDPLKALERDLVSAG-----MVSSEELRAIE  
RZO14415.1 LTYRFRGHSLADPDELRAEEEEKQFWA-QRDPLKALERDLVSAG-----IVSSEELRAIE  
WP\_115120634.1 LTYRFRGHSLADPDELRAEEEEKQFWA-QRDPLKALERDLVSAG-----LVSSSEELRAIE  
WP\_115020054.1 LTYRFRGHSLADPDELRAEEEEKQFWA-QRDPLKALERDLVSAG-----LVSSSEDLRAIE  
WP\_007098531.1 LTYRFRGHSLADPDELRAEEEEKQFWA-QRDPIKALERDLVSAG-----LATADDLRTIE  
WP\_063403366.1 LTYRFRGHSLADPDELRAEEEEKQFWA-KRDPLKALEKDLTSES-----LVSAEELRAIE  
KZR70120.1 LTYRFRGHSLADPDELRAEEEEKQFWA-KRDPLKALEKDLTSES-----LVSAEELRTIE  
WP\_063414562.1 LTYRFRGHSLADPDELRAEEEEKQFWA-KRDPLKALEKDLTSES-----LVSAEELRAIE  
WP\_063397204.1 LTYRFRGHSLADPDELRAEEEEKQFWA-KRDPLKALEKDLTSES-----LVRADDELRAIE  
WP\_011826582.1 LTYRFRGHSLADPDELRAEEEEKQFWA-KRDPLKALEKDLTSES-----LVRADDELRAIE  
RZO50162.1 LTYRFRGHSLADPDELRAEEEEKQFWA-KRDPLKALEKDLTSES-----LVRADDELRAIE  
WP\_011129726.1 LTYRFRGHSLADPDELRAEEEEKQFWA-KRDPLKALEKDLTSES-----LVRAEELRAIE  
WP\_063399594.1 LTYRFRGHSLADPDELRAEEEEKQFWA-KRDPLKALEKDLTSES-----LVSAEELRAIE

WP\_036912824.1 LTYRFRGHSLADPDELRSEREREKEFWA-ERDPLRALEHDLTQAN-----LVRADELRAIE  
GCE65219.1 LTYRFRGHSLADPDELRSEREREKEFWA-ERDPLRALEHDLTQAN-----LVTAEQLRTVE  
WP\_150884904.1 LTYRFRGHSLADPDELRRREEKQFWA-RRDPIQALERDLTSQG-----LVAAGELRAIE  
TGG79186.1 LTYRFRGHSLADPDELRCQEKAQFWA-RRDPLKGLAAHLIDHG-----LACQAELSAIG  
MXX09417.1 LTYRFRGHSLADPDELRSEREREKEFWA-RRDPIAALAAQLTRHD-----LASPEDLDAIS  
MYF36125.1 LTYRFRGHSLADPDELRSEREREKEFWA-RRDPIAALAAQLTRHD-----LASPEDLDAIS  
MXW12941.1 LTYRFRGHSLADPDELRSEREREKEFWA-RRDPIAALAAQLTRHD-----LASPEDLDAIS  
WP\_034416483.1 LTYRFRGHSLADPDELRSEREREKEFWA-RRDPIAALGAHLTRHD-----LATPEDLAAIN  
HBP54007.1 LTYRFRGHSLADPDELRSEREREKEFWA-RRDPTAALGAHLTRHD-----LATPEDLAAIN  
WP\_143325374.1 LTYRFRGHSLADPDELRSEREREKEFWA-RRDPIAALSQQLTRHG-----LASSGRLLAID  
OOV28384.1 LTYRFRGHSLADPDELRSEREREKEFWA-RRDPIAALSQQLTRHG-----LASSGRLLAID  
KKZ14696.1 LTYRFRGHSLADPDELRSEREREKEFWA-RRDPIAALSQQLTRHG-----LASSGRLLAID  
OOV35959.1 LTYRFRGHSLADPDELRSEREREKEFWA-RRDPIAALSQQLTRHG-----LASSGRLLAID  
MXW40928.1 LTYRFRGHSLADPDELRSEREREKEFWA-RRDPIAALSQQLTRHG-----LASSGRLLAID  
MXZ82475.1 LTYRFRGHSLADPDELRSEREREKEFWA-RRDPIAALSQQLTRHG-----LASSGRLLAID  
WP\_074457610.1 LTYRFRGHSLADPDELRSEREREKEFWA-RRDPIAALSQQLTRHG-----LASSGRLLAID  
KKZ10870.1 LTYRFRGHSLADPDELRSEREREKEFWA-RRDPIAALSQQLTRHG-----LASSGRLLAID  
KKZ11816.1 LTYRFRGHSLADPDELRSEREREKEFWA-RRDPIAALSQQLTRHG-----LASSGRLLAID  
WP\_011125513.1 LTYRFRGHSLADPDELRSEREREKEFWA-RRDPIAALSQQLTRHG-----LASSGRLLAID  
KGG14287.1 LTYRFRGHSLADPDELRSEREREKEFWA-RRDPIAALSQQLTRHG-----LASSGRLLAID  
KGG22140.1 LTYRFRGHSLADPDELRSEREREKEFWA-RRDPIAALSQQLTRHG-----LASSGRLLAID  
WP\_036918589.1 LTYRFRGHSLADPDELRSEREREKEFWA-RRDPIAALSQQLTRHG-----LASSGRLLAID  
KGG16280.1 LTYRFRGHSLADPDELRSEREREKEFWA-RRDPIAALSQQLTRHG-----LASSGRLLAID  
WP\_012195887.1 LTYRFRGHSLADPDELRSEREREKEFWA-RRDPIAALSQQLTRHG-----LASSGRLLAID  
WP\_036902357.1 LTYRFRGHSLADPDELRSEREREKEFWA-RRDPIAALSQQLTRHG-----LASSGRLLAID  
KGF96626.1 LTYRFRGHSLADPDELRSEREREKEFWA-RRDPIAALSQQLTRHG-----LASSGRLLAID  
WP\_032521686.1 LTYRFRGHSLADPDELRSEREREKEFWA-RRDPIAALSQQLTRHG-----LASSGRLLAID  
KGG00227.1 LTYRFRGHSLADPDELRSEREREKEFWA-RRDPIAALSQQLTRHG-----LASSGRLLAID  
WP\_032516396.1 LTYRFRGHSLADPDELRSEREREKEFWA-RRDPIAALSQQLTRHG-----LASSGRLLAID  
WP\_079292646.1 LTYRFRGHSLADPDELRSEREREKEFWA-RRDPIAALSQQLTRHG-----LASSGRLLAID  
WP\_079340310.1 LTYRFRGHSLADPDELRSEREREKEFWA-RRDPIAALSQQLTRHG-----LASSGRLLAID  
WP\_075439730.1 LTYRFRGHSLADPDELRSEREREKEFWA-RRDPIAALSQQLTRHG-----LASSGRLLAID  
WP\_011818906.1 LTYRFRGHSLADPDELRSEREREKEFWA-RRDPIAALSQQLTRHG-----LASSGRLLAID  
WP\_162512646.1 LTYRFRGHSLADPDELRSEREREKEFWA-RRDPIAALSQQLTRHG-----LASSGRLLAID  
KGG09007.1 LTYRFRGHSLADPDELRSEREREKEFWA-RRDPIAALSQQLTRHG-----LASSGRLLAID  
WP\_032520254.1 LTYRFRGHSLADPDELRSEREREKEFWA-RRDPIAALSQQLTRHG-----LASSGRLLAID  
WP\_162514320.1 LTYRFRGHSLADPDELRSEREREKEFWA-RRDPIAALSQQLTRHG-----LASSGRLLAID  
WP\_075448198.1 LTYRFRGHSLADPDELRSEREREKEFWA-RRDPIAALSQQLTRHG-----LASSGRLLAID  
WP\_162503701.1 LTYRFRGHSLADPDELRSEREREKEFWA-RRDPIAALSQQLTRHG-----LASSGRLLAID  
WP\_011863403.1 LTYRFRGHSLADPDELRSEREREKEFWA-RRDPIAALSQQLTRHG-----LASSGRLLAID  
WP\_079332980.1 LTYRFRGHSLADPDELRSEREREKEFWA-RRDPIAALSQQLTRHG-----LASSGRLLAID  
WP\_075507035.1 LTYRFRGHSLADPDELRSEREREKEFWA-RRDPIAALSQQLTRHG-----LASSGRLLAID  
WP\_079337386.1 LTYRFRGHSLADPDELRSEREREKEFWA-RRDPIAALSQQLTRHG-----LASSGRLLAID  
AIQ95599.1 LTYRFRGHSLADPDELRSEREREKEFWA-RRDPIAALSQQLTRHG-----LASSGRLLAID  
WP\_042850841.1 LTYRFRGHSLADPDELRSEREREKEFWA-RRDPIAALSQQLTRHG-----LASSGRLLAID  
WP\_075536812.1 LTYRFRGHSLADPDELRSEREREKEFWA-RRDPIAALSQQLTRHG-----LASSGRLLAID  
KGG01314.1 LTYRFRGHSLADPDELRSEREREKEFWA-RRDPIAALSQQLTRHG-----LASSGRLLAID  
WP\_011376930.1 LTYRFRGHSLADPDELRSEREREKEFWA-RRDPIAALSQQLTRHG-----LASSGRLLAID  
WP\_002805940.1 LTYRFRGHSLADPDELRSEREREKEFWA-RRDPIAALSQQLTRHG-----LASSGRLLAID  
WP\_012008176.1 LTYRFRGHSLADPDELRSEREREKEFWA-RRDPIAALSQQLTRHG-----LASSGRLLAID  
KGF85353.1 LTYRFRGHSLADPDELRSEREREKEFWA-RRDPIAALSQQLTRHG-----LASSGRLLAID  
WP\_032524876.1 LTYRFRGHSLADPDELRSEREREKEFWA-RRDPIAALSQQLTRHG-----LASSGRLLAID  
WP\_079318627.1 LTYRFRGHSLADPDELRSEREREKEFWA-RRDPIAALSQQLTRHG-----LASSGRLLAID  
WP\_032513088.1 LTYRFRGHSLADPDELRSEREREKEFWA-RRDPIAALSQQLTRHG-----LASSGRLLAID  
WP\_032523520.1 LTYRFRGHSLADPDELRSEREREKEFWA-RRDPIAALSQQLTRHG-----LASSGRLLAID  
WP\_032527218.1 LTYRFRGHSLADPDELRSEREREKEFWA-RRDPIAALSQQLTRHG-----LASSGRLLAID  
WP\_025913752.1 LTYRFRGHSLADPDELRSEREREKEFWA-RRDPIAALSQQLTRHG-----LASSGRLLAID  
WP\_079342464.1 LTYRFRGHSLADPDELRSEREREKEFWA-RRDPIAALSQQLTRHG-----LASSGRLLAID  
WP\_032518250.1 LTYRFRGHSLADPDELRSEREREKEFWA-RRDPIAALSQQLTRHG-----LASSGRLLAID  
WP\_162515038.1 LTYRFRGHSLADPDELRSEREREKEFWA-RRDPIAALSQQLTRHG-----LASSGRLLAID  
WP\_011132922.1 LTYRFRGHSLADPDELRSEREREKEFWA-RRDPIAALSQQLTRHG-----LASSGRLLAID  
WP\_011820753.1 LTYRFRGHSLADPDELRSEREREKEFWA-RRDPIAALSQQLTRHG-----LASSGRLLAID  
WP\_079323018.1 LTYRFRGHSLADPDELRSEREREKEFWA-RRDPIAALSQQLTRHG-----LASSGRLLAID  
MBK16634.1 LTYRFRGHSLADPDELRSEREREKEFWA-RRDPIAALSQQLTRHG-----LASSGRLLAID  
WP\_041700622.1 LTYRFRGHSLADPDELRSEREREKEFWA-RRDPIAALSQQLTRHG-----LASSGRLLAID  
ABM76264.1 LTYRFRGHSLADPDELRSEREREKEFWA-RRDPIAALSQQLTRHG-----LASSGRLLAID  
WP\_036905297.1 LTYRFRGHSLADPDELRSEREREKEFWA-RRDPIAALSQQLTRHG-----LASSGRLLAID  
WP\_110861512.1 LTYRFRGHSLADPDELRSEREREKEFWA-RRDPIAALSQQLTRHG-----LASSGRLLAID  
AAZ58346.1 LTYRFRGHSLADPDELRSEREREKEFWA-RRDPIAALSQQLTRHG-----LASSGRLLAID

WP\_041711031.1 LTYRFRGHSLADPDELRSEKEKEFWA-KRDP IKKLNKDLTSSG-----LVFDEELKNIE  
WP\_038653884.1 LTYRFRGHSLADPDELRSEKEKEFWA-KRDP IKKLNKDLTSSG-----LISDEELKNIE  
WP\_158467031.1 LTYRFRGHSLADPDELRSEKEKEFWA-KKDP IKKLIKIDLTSSG-----LASEEELKNIE  
HBC41512.1 MTYRFRGHSLADPDELRSEKEDKDKWF-GRDP IKIFASRVIEHR-----LVDESQKKAID  
WP\_169365002.1 MTYRFRGHSLADPDELRSEKEDKDKWF-GRDP IKIFASRVIEHG-----LVDESQKKAID  
WP\_126387266.1 MTYRFRGHSLADPDELRSEKEDKDKWF-GRDP IKIFASRALEHG-----LVNEGQLKDID  
WP\_175357412.1 MTYRFRGHSLADPDELRSEKEDKDKWF-GRDP IKIFASRI IEHG-----LVEESQKKAID  
PZU98285.1 MTYRFRGHSLADPDELRSEKEDKDKWF-GRDP IKIFASRI IEHG-----LVEESQKKAID  
OIP70713.1 MTYRFRGHSLADPDELRSEKEDKDKWF-GRDP IKIFASRI IEHG-----LVEESQKKAID  
WP\_190397563.1 MTYRFRGHSLADPDELRSEKEDKDKWF-GRDP IKIFASTLIEHG-----VVEESQKKAID  
WP\_190402863.1 MTYRFRGHSLADPDELRSEKEDKDKWF-GRDP IKIFASRI LEHG-----LVEEAQKKAID  
WP\_103666622.1 MTYRFRGHSLADPDELRSEKEDKDKWF-GRDP IKIFASRLLEHG-----LVEESQKKAID  
WP\_142656880.1 MTYRFRGHSLADPDELRSEKEDKDKWF-GRDP IKIFASRLLEHG-----LVEEAQKKAID  
GBO53033.1 MTYRFRGHSLADPDELRSEKEDKDKWF-GRDP IKIFASRLLEHG-----LVEESQKKAID  
PZV11084.1 MTYRFRGHSLADPDELRSEKEDKDKWF-GRDP IKIFASRI LEHG-----LVKEKQKKAID  
WP\_142600456.1 MTYRFRGHSLADPDELRSEKEDKDKWF-GRDP IKIFASRVLEHG-----LVTESQKKAID  
WP\_009626838.1 MTYRFRGHSLADPDELRSEKEDKDKWF-GRDP IKIFASRVLEHG-----LVTESQKKAID  
WP\_094529606.1 MTYRFRGHSLADPDELRSEKEDKDKWF-GRDP IKIFASRVLEHG-----LVEESQKKAID  
WP\_190575408.1 MTYRFRGHSLADPDELRSEKEDKDKWF-GRDP IKIFASRVLEHG-----LVEESQKKAID  
PZO44965.1 MTYRFRGHSLADPDELRSEKEDKDKWF-GRDP IKIFASRVLEHG-----LVTESQKKAID  
WP\_190352595.1 MTYRFRGHSLADPDELRSEKEDKDKWF-GRDP IKIFASRI IEHG-----LVEESQKKAID  
WP\_026103513.1 MTYRFRGHSLADPDELRPKEEKDEWF-GRDP IEIFASKLMEHG-----LASEKQKKAID  
WP\_015169202.1 MTYRFRGHSLADPDELRPKEEKDEWF-GRDP IKILAAKLLSAG-----LTSEQDLKKAID  
WP\_015163657.1 MTYRFRGHSLADPDELRPKEEKDEWF-SRDP IKLFSSYLIEHG-----LSNQADLKAID  
NJK60408.1 MTYRFRGHSLADPDELRPKEEKQWF-GRDP ITLLGDRLLAAG-----LVSADELKAIQ  
HAN45263.1 MTYRFRGHSLADPDELRPKEEKDEWF-GRDP ITLLGDRLLAAG-----LVADELKAIQ  
NJK35515.1 MTYRFRGHSLADPDELRPREEKQWF-GRDP IKILAAEILSRR-----LATEEQKKAID  
PLS68699.1 MTYRFRGHSLADPDELRSQEEKDFWF-ARDP IKLLKNTILDRN-----LVTEAELTAID  
WP\_190800391.1 HTYRFRGHSLADPDELRPAEEKEAWL-ARDP IKILAAARL TEHG-----LANGEELKKAID  
WP\_172354317.1 LTYRFRGHSLADPDELRSAEKEFWF-ARDP IKRLLAAHLIEQN-----LATDEELKKAID  
HIK42963.1 LTYRFRGHSLADPDELRSAEKEFWF-ARDP IKRLLAAHLIEQN-----LATDEELKKAID  
MBF2087078.1 LTYRFRGHSLADPDELRSAEKEFWF-ARDP IKRLLAAHLIEQN-----LATDEELKKAID  
WP\_068512541.1 LTYRFRGHSLADPDELRSAEKEFWF-ARDP IKRLLAAHLIEQN-----LATDEELKKAID  
RMF67064.1 LTYRFRGHSLADPDELRSAEKEFWF-ARDP IKRLLAAHLIEQN-----LATAEELKKAID  
MBE9100068.1 LTYRFRGHSLADPDELRSAEKEFWF-ARDP IKRLLAAHLIEQN-----LATQEELKGIN  
WP\_190771905.1 LTYRFRGHSLADPDELRSAEKEFWF-ARDP IKRLLAAHLIEQN-----LAVDELKKAID  
NJJ57434.1 LTYRFRGHSLADPDELRSAEKEFWF-SRDP IKKLLAAHLVEQN-----LVSQDELKQID  
NJJL36865.1 LTYRFRGHSLADPDELRSAEKEFWF-SRDP IKKLLAAHLVEQN-----LVSQDELKQID  
WP\_190646115.1 LTYRFRGHSLADPDELRSAEKEFWF-SRDP IKKLLAAHLIEQN-----LVNQDELKEID  
WP\_193874981.1 LTYRFRGHSLADPDEMRSKAEKEVWF-SRDP IKKFAAYL TEQN-----LVQHDELLDIE  
WP\_169611668.1 LTYRFRGHSLADPDELRSAEKEEVL-ARDP IKRFEAYLLEHN-----LADEGELKAIR  
TVP67340.1 LTYRFRGHSLADPDELRSAEKEEVL-ARDP IKRFEAYLLEHN-----LADEGTLKAIR  
WP\_190495716.1 LTYRFRGHSLADPDELRSAEKEEVL-ARDP IKRFEAYLLEQN-----LADEATLKQVR  
WP\_198806775.1 LTYRFRGHSLADPDELRSAEKEEVL-ARDP IKRFEAYLLEQN-----LADEATLKQVR  
PSR18305.1 LTYRFRGHSLADPDELRSAEKEEVL-ARDP IKRFEAYLVEHN-----LAEKGLTKEVR  
PSN14218.1 LTYRFRGHSLADPDELRSAEKEEVL-ARDP IKRFEAYLVEHN-----LAEKGLTKEVR  
WP\_194051320.1 LTYRFRGHSLADPDELRSAEKEEVL-ARDP IKRFEAYLVEHN-----LAEKGLTKEVR  
WP\_194022807.1 LTYRFRGHSLADPDELRSAEKEEVL-ARDP IKRFEAYLVEHN-----LAEKGLTKEVR  
WP\_035985435.1 LTYRFRGHSLADPDELRSAEKEEVL-ARDP IKRFEAYLLEHN-----LADEGALKEVR  
WP\_190754420.1 LTYRFRGHSLADPDELRSAEKEEVL-ARDP IKRFEAYLLEQN-----LADEGTLKEVR  
WP\_190702478.1 LTYRFRGHSLADPDELRSAEKEEVL-ARDP IKRFEAYLLEQN-----LADEGTLKEVR  
WP\_190517590.1 LTYRFRGHSLADPDELRSAEKEEVL-ARDP IKRFEAYLLEQN-----LADEGTLKEVR  
WP\_190629089.1 LTYRFRGHSLADPDELRSAEKEEVL-ARDP IKRFEAYLLEQN-----LADEGTLKEVR  
WP\_073607834.1 LTYRFRGHSLADPDELRSAEKEEVL-ARDP IKRFEAYLLEQN-----LADEGTLKEVR  
PZV08456.1 LTYRFRGHSLADPDELRSAEKEEVL-ARDP IKRFEAYLLEQN-----LADEGTLKEVR  
WP\_017301098.1 LTYRFRGHSLADPDELRSAEKEEVL-ARDP IKRFEAYLLEHN-----LTDEGGLKQVR  
PZV14554.1 LTYRFRGHSLADPDELRSAEKEEVL-ARDP IKRFEAYLLEHD-----LVDEGALKEVR  
PZO41552.1 LTYRFRGHSLADPDELRSAEKEEVL-ARDP IKRFEAYLLEHS-----LTDEGALKEVR  
TVQ05830.1 LTYRFRGHSLADPDELRSAEKEEVL-ARDP IKRFEAYLLEHN-----LVDEGALKAVR  
WP\_193965211.1 LTYRFRGHSLADPDELRSAEKEEVL-ARDP IKRFEAYLLKHN-----LTDEATLKAMR  
HIK45267.1 LTYRFRGHSLADPDELRSAEKEEVL-ARDP IKRFEAYLLENN-----LVDEDTLRGIR  
MBD0335105.1 LTYRFRGHSLADPDELRSAEKEEVL-ARDP IKRFEAYLLEQN-----LADEETLKQVR  
WP\_190482416.1 LTYRFRGHSLADPDELRSAEKEEVL-ARDP IKRFEAYLLEQN-----LADEETLKQVR  
PSN18296.1 LTYRFRGHSLADPDELRSAEKEEVL-ARDP IKRFEAYLVEHN-----LASQDQLKEIV  
WP\_080814135.1 LTYRFRGHSLADPDELRSAEKEEVL-ARDP IKRFEAYLLEQN-----LANESELKAIR  
WP\_008309458.1 LTYRFRGHSLADPDELRSAEKEEVL-ARDP IKRFEAYLLEQN-----LATEADLKTIR  
NJJN21704.1 LTYRFRGHSLADPDELRSAEKEEVL-ARDP IKRFEAYLLEQN-----LATEADLKAIR  
MBF2034311.1 LTYRFRGHSLADPDELRSAEKEEVL-ARDP IKRFEAYLLEQN-----LASEADLKAIR  
NEQ43659.1 LTYRFRGHSLADPDELRSAEKEEVL-SRDP IKRFEAYLLEQN-----LAADELKAVR

WP\_039728256.1 LTYRFRGHSLADPDELRSAEKKKFWF-ARDPIKRFQAYLVEQN-----LVKAEELKAIR  
MBE7384229.1 LTYRFRGHSLADPDELRSAEKKKFWF-ARDPIKRFQAYLVEQN-----LVQETDLKAIR  
NER84967.1 LTYRFRGHSLADPDELRSAEKKKFWF-ARDPIKRFQAYLVEQN-----LAQETDLKAIR  
NEQ30142.1 LTYRFRGHSLADPDELRSAEKKKFWF-ARDPIKRFQAYLVEQN-----IADEPDLKAIR  
NJL86991.1 LTYRFRGHSLADPDELRSAEKKKFWF-ARDPIKRFQAYLVEQN-----LAGEPELKAIR  
PZO16604.1 LTYRFRGHSLADPDELRSAEKKKFWF-ARDPIKRFQAYLVEQN-----LVKDSALKAIR  
KPQ34990.1 LTYRFRGHSLADPDELRSAEKKKFWF-ARDPIKRFQAYLVEQN-----LSTAADLKAIR  
PZO59971.1 LTYRFRGHSLADPDELRSAEKKKFWF-ARDPIKRFQAYLVEQN-----LTSEADLKAVR  
WP\_121968152.1 LTYRFRGHSLADPDELRSAEKKKFWF-ARDPIKRFQAYLVEQN-----LASEADLKSIR  
WP\_193857299.1 LTYRFRGHSLADPDELRSAEKKKFWF-ARDPIKRFQAYLVEQN-----LISEAEIKSIR  
WP\_006454326.1 LTYRFRGHSLADPDELRSAEKKKFWF-ARDPIKRFQAYLVEQN-----LVSEAEIKAVR  
WP\_193909417.1 LTYRFRGHSLADPDELRSAEKKKFWF-ARDPIKRFQAYLVEQN-----LADDEVLKAIR  
WP\_031294493.1 LTYRFRGHSLADPDELRSAEKKKFWF-ARDPIKRFQAYLVEQN-----LADEAELKAIR  
ESA32648.1 LTYRFRGHSLADPDELRSAEKKKFWF-ARDPIKRFQAYLVEQN-----LADEAELKAIR  
WP\_006515269.1 LTYRFRGHSLADPDELRSAEKKKFWF-ARDPIKRFQAYLVEQN-----LADEAELKAIR  
WP\_193994201.1 LTYRFRGHSLADPDELRSAEKKKFWF-ARDPIKRFQAYLVEQN-----LADDAELKAIR  
NEQ49802.1 LTYRFRGHSLADPDELRSAEKKKFWF-ARDPIKRFQAYLVEQN-----LADDAELKAIR  
NEP59952.1 LTYRFRGHSLADPDELRSAEKKKFWF-ARDPIKRFQAYLVEQN-----LANAEELKAIR  
NEP19457.1 LTYRFRGHSLADPDELRSAEKKKFWF-ARDPIKRFQAYLVEQN-----LADEETLKSIR  
NET31533.1 LTYRFRGHSLADPDELRSAEKKKFWF-ARDPIKRFQAYLVEQN-----LATQAEELKAIR  
WP\_190768206.1 LTYRFRGHSLADPDELRSAEKKKFWF-ARDPIKRFQAYLVEQN-----LASAEELKAIR  
NEQ23360.1 LTYRFRGHSLADPDELRSAEKKKFWF-ARDPIKRFQAYLVEQN-----LATSEELKEID  
NET11057.1 LTYRFRGHSLADPDELRSAEKKKFWF-ARDPIKRFQAYLVEQN-----LVTAEELKAIR  
NEQ98937.1 LTYRFRGHSLADPDELRSAEKKKFWF-ARDPIKRFQAYLVEQN-----LATAEELKAIR  
TVQ22815.1 LTYRFRGHSLADPDELRSAEKKKFWF-ARDPIKRFQAYLVEQN-----LATEAELKAIR  
MBF2088342.1 LTYRFRGHSLADPDELRSAEKKKFWF-ARDPIKRFQAYLVEQN-----LATEAELKAIR  
MBF2077803.1 LTYRFRGHSLADPDELRSAEKKKFWF-ARDPIKRFQAYLVEQN-----LVAEELKEIE  
WP\_012626468.1 LTYRFRGHSLADPDELRSAEKKKFWF-ARDPIKRFQAYLVEQN-----LAQDKELKAIR  
NBO31100.1 LTYRFRGHSLADPDELRSAEKKKFWF-ARDPIKRFQAYLVEQN-----ICQDTELKRID  
NJK29024.1 LTYRFRGHSLADPDELRSAEKKKFWF-ARDPIKRFQAYLVEQN-----LAKQELTEID  
NJM67168.1 LTYRFRGHSLADPDELRSAEKKKFWF-ARDPIKRFQAYLVEQN-----LAKQELTEID  
WP\_012161918.1 LTYRFRGHSLADPDELRSAEKKKFWF-ARDPIKRFQAYLVEQN-----LVKEQELLDID  
WP\_010472859.1 LTYRFRGHSLADPDELRSAEKKKFWF-ARDPIKRFQAYLVEQN-----LAKEQELLDID  
NJK41776.1 LTYRFRGHSLADPDELRSAEKKKFWF-ARDPIKRFQAYLVEQN-----LASQAEELTAID  
WP\_110988139.1 LTYRFRGHSLADPDELRSAEKKKFWF-ARDPIKRFQAYLVEQN-----LVDQAEELTDID  
WP\_166276235.1 LTYRFRGHSLADPDELRSAEKKKFWF-ARDPIKRFQAYLVEQN-----LATQEDFKGIQ  
NJM78164.1 LTYRFRGHSLADPDELRSAEKKKFWF-ARDPIKRFQAYLVEQN-----LATSDDLKAIQ  
NCJ05469.1 LTYRFRGHSLADPDELRSAEKKKFWF-ARDPIKRFQAYLVEQN-----LANQDELKAIR  
WP\_126986310.1 LTYRFRGHSLADPDELRSAEKKKFWF-ARDPIKRFQAYLVEQN-----LATGEDLRAIE  
WP\_011057011.1 LTYRFRGHSLADPDELRSAEKKKFWF-ARDPIKRFQAYLVEQN-----LATGEDLRAIE  
WP\_024124449.1 LTYRFRGHSLADPDELRSAEKKKFWF-ARDPIKRFQAYLVEQN-----LATSDDLRAIE  
HIK24216.1 LTYRFRGHSLADPDELRSAEKKKFWF-ARDPIKRFQAYLVEQN-----LATSDDLRAIE  
WP\_149820695.1 LTYRFRGHSLADPDELRSAEKKKFWF-ARDPIKRFQAYLVEQN-----LATSDDLRAIE  
WP\_181495774.1 LTYRFRGHSLADPDELRSAEKKKFWF-ARDPIKRFQAYLVEQN-----LATTEDLRAIE  
HIK36069.1 LTYRFRGHSLADPDELRSAEKKKFWF-ARDPIKRFQAYLVEQN-----LATNEDLRAIE  
HIK25176.1 LTYRFRGHSLADPDELRSAEKKKFWF-ARDPIKRFQAYLVEQN-----LATNEDLRAIE  
WP\_099798932.1 LTYRFRGHSLADPDELRSAEKKKFWF-ARDPIKRFQAYLVEQN-----LATTEDLQNI  
WP\_015124179.1 LTYRFRGHSLADPDELRSAEKKKFWF-ARDPIKRFQAYLVEQN-----LATAAELKDID  
MBF2097449.1 LTYRFRGHSLADPDELRSAEKKKFWF-ARDPIKRFQAYLVEQN-----IVTQADLSAID  
WP\_075599370.1 LTYRFRGHSLADPDELRSAEKKKFWF-ARDPIKRFQAYLVEQN-----LATQAEELKAIR  
WP\_036533717.1 LTYRFRGHSLADPDELRSAEKKKFWF-ARDPIKRFQAYLVEQN-----LATAAELKAIR  
QFZ92486.1 LTYRFRGHSLADPDELRSAEKKKFWF-ARDPIKRFQAYLVEQN-----LATHEELKAIR  
AZB72868.1 LTYRFRGHSLADPDELRSAEKKKFWF-ARDPIKRFQAYLVEQN-----LATHEELKAIR  
WP\_011244460.1 LTYRFRGHSLADPDELRSAEKKKFWF-ARDPIKRFQAYLVEQN-----LATHEELKAIR  
WP\_126147703.1 LTYRFRGHSLADPDELRSAEKKKFWF-ARDPIKRFQAYLVEQN-----LATHEELKAIR  
WP\_017712216.1 LTYRFRGHSLADPDELRSAEKKKFWF-ARDPIKRFQAYLVEQN-----LATPEELKID  
NJN32620.1 LTYRFRGHSLADPDELRSAEKKKFWF-ARDPIKRFQAYLVEQN-----HATAEELKAVE  
NJN85876.1 LTYRFRGHSLADPDELRSAEKKKFWF-ARDPIKRFQAYLVEQN-----LATPEELKEVS  
WP\_015172813.1 LTYRFRGHSLADPDELRSAEKKKFWF-ARDPIKRFQAYLVEQN-----LATQEDLKAIR  
HIK57239.1 LTYRFRGHSLADPDELRSAEKKKFWF-ARDPIKRFQAYLVEQN-----LATQEDLKAIE  
WP\_106259423.1 LTYRFRGHSLADPDELRSAEKKKFWF-ARDPIKRFQAYLVEQN-----LASQDELKAIE  
WP\_190448392.1 LTYRFRGHSLADPDELRSAEKKKFWF-ARDPIKRFQAYLVEQN-----LASQDELKAIE  
WP\_190344556.1 LTYRFRGHSLADPDELRSAEKKKFWF-ARDPIKRFQAYLVEQN-----LANQDELKAIE  
MBC6433511.1 LTYRFRGHSLADPDELRSAEKKKFWF-ARDPIKRFQAYLVEQN-----LADQSELKAIE  
WP\_068815744.1 LTYRFRGHSLADPDELRSAEKKKFWF-ARDPIKRFQAYLVEQN-----LADQSELKAIE  
WP\_073073349.1 LTYRFRGHSLADPDELRSAEKKKFWF-ARDPIKRFQAYLVEQN-----LADQOTLKDIE  
NJR48891.1 LTYRFRGHSLADPDELRSAEKKKFWF-ARDPIKRFQAYLVEQN-----LADQSELKAIE  
MBE9033279.1 LTYRFRGHSLADPDELRSAEKKKFWF-ARDPIKRFQAYLVEQN-----LADQTELKAIR  
MBC7515949.1 LTYRFRGHSLADPDELRSAEKKKFWF-ARDPIKRFQAYLVEQN-----LAEQAEELKAIR

WP\_190574311.1 LTYRFRGHSLADPDELRSAEAEKQFWA-ARDPIKQKFAAYLVEQN-----LATQPELKDID  
OUC12989.1 LTYRFRGHSLADPDELRSKKEEKDSWF-SRDPIKKLAAAYMIDQN-----LATQEEELKNID  
WP\_068380274.1 LTYRFRGHSLADPDELRSKKEEKEAWL-ARDPLKFKFSAYLIEQN-----LVKQSEIKEIE  
MBE9009974.1 LTYRFRGHSLADPDELRSKKEEKEAWL-ARDPLKFKLSAYLIEQN-----LVKQSEIKSIE  
WP\_058998068.1 LTYRFRGHSLADPDELRSKKEEKEAWL-ARDPLKFKFSYLLIEQN-----LVQSQSEIKEIE  
WP\_190378808.1 LTYRFRGHSLADPDELRSKKEEKEAWL-ARDPLKFKFSYLLIEQN-----LVKQSELKDIE  
WP\_017285746.1 LTYRFRGHSLADPDELRSKKEEKEAWL-ARDPLKFKLSAYLIEQS-----LVTQSELKDIE  
WP\_162424416.1 LTYRFRGHSLADPDELRSKAEKEAWL-ARDPIKFKFSAYLIEQN-----LADQPELKAIE  
HFM97379.1 LTYRFRGHSLADPDELRSKAEKDVWL-ARDPIKKLAAHMLEQN-----LATQDELKAIE  
MBF2027541.1 LTYRFRGHSLADPDELRSKAEKEHWF-ARDPIKFKFAAYLIEQN-----LATQEEELKDID  
EKQ71072.1 LTYRFRGHSLADPDELRSKAEKEHWF-SRDPIKFKFAAYLIEQN-----LATQEEELQEID  
PZV13752.1 LTYRFRGHSLADPDELRSKAEKELWF-ARDPIKFKFSAYLIEQN-----LATQDDDLKAIE  
NJP09855.1 LTYRFRGHSLADPDELRSKAEKELWF-ARDPIKFKFSAYLIEQN-----LAMPEDLNAID  
WP\_190438930.1 LTYRFRGHSLADPDELRTKDEKEAWL-ARDPIKFKFAAYLIEQN-----LVNQEEELKAIE  
WP\_190551955.1 LTYRFRGHSLADPDELRTKDEKEAWL-ARDPIKFKFAAYLIEEN-----LVNQEEELKAIE  
MBF2001426.1 LTYRFRGHSLADPDELRSKTEKELWL-ARDPIKKLANYLIDKQ-----LTDAAELKAIE  
MBF2075607.1 LTYRFRGHSLADPDELRSKTEKELWL-ARDPIKKLANYLIDKQ-----LTDAAELKAID  
MBF2051415.1 LTYRFRGHSLADPDELRSKAEKEAWL-ARDPLKFKLANHLIDQK-----LVTQADELKAIE  
NJO79919.1 LTYRFRGHSLADPDELRSKAEKEAWL-ARDPLKFKLAAYMIEKQ-----LASAEELKDIE  
WP\_088893394.1 LTYRFRGHSLADPDELRSKSEKEAWL-ARDPIKKLAAHLTDNK-----LAEADELKAID  
WP\_190789898.1 LTYRFRGHSLADPDELRSKAEKEAWL-ARDPIKKLAGHLTEKN-----LATAAEELKAID  
MBI4782040.1 LTYRFRGHSLADPDELRSKTEKEFWL-ARDPIKRLKTHLIEQQ-----LFEEEELKAIE  
NJR61179.1 LTYRFRGHSLADPDELRSKAEKEAWL-ARDPVKKLATYLLDKQ-----LVEAGELKAID  
NJO40830.1 LTYRFRGHSLADPDELRSKAEKEAWL-ARDPVKKLATYLLDKQ-----LVEAGELKAID  
PSB20757.1 LTYRFRGHSLADPDELRSKAEKEEWL-ARDPIKRLAAYLTDKN-----LVSADDELKAID  
WP\_191129293.1 LTYRFRGHSLADPDELRSKAEKEEWL-ARDPIKKLATYLLDKQ-----LADETDLKAID  
WP\_190510807.1 LTYRFRGHSLADPDELRSKTEKDFWL-ARDPIKQLAAHLTNHN-----LATADELKAID  
NJM58478.1 LTYRFRGHSLADPDELRSKKEEKEFWL-AKDPKRLAAYLVEHN-----LASQEEELKGDID  
NJK28487.1 LTYRFRGHSLADPDELRNPEEKRFWQ-TRDPKQLSGHLIEHK-----LATQEDLKAIE  
WP\_010873216.1 LTYRFRGHSLADPDELRSAEKEQFWA-ARDPIKFKFAAFMTEHE-----LASNEELKAID  
WP\_162328552.1 LTYRFRGHSLADPDELRSAEKEQFWA-ARDPIKFKFAAFMTEHE-----LASNEELKAID  
WP\_194019415.1 LTYRFRGHSLADPDELRSAEKEQFWA-ARDPIKFKFAAFITEHE-----LASNEELKEIQ  
WP\_190596953.1 LTYRFRGHSLADPDELRSAEKEQFWA-ARDPIKFKFAAFITEHE-----LASNEELKEIQ  
WP\_194017728.1 LTYRFRGHSLADPDELRSAEKEQFWA-ARDPIKFKFAAFMTEHE-----LASSEELKEIQ  
WP\_028948828.1 LTYRFRGHSLADPDELRSAEKEQFWA-ARDPIKFKGAFMTEHE-----LASNEELKAIE  
MBJ7901178.1 LTYRFRGHSLADPDELRSADEKQFWG-ARDPIKFKFAAYATEHN-----LATQEEELKAIE  
PZV27966.1 LTYRFRGHSLADPDELRSPDEKQFWG-ARDPIQKFAAYLVEYN-----LVSSEELKEVD  
WP\_015144713.1 LTYRFRGHSLADPDELRSPDEKQFWG-ARDPIKFKFAAYLFEHN-----LAEHEELKEIE  
WP\_073597795.1 LTYRFRGHSLADPDELRSHDEKQFWG-ARDPIKFKFAAYLFEHN-----LAEHEELKEIE  
NJM90224.1 LTYRFRGHSLADPDELRSPDEKQYWG-ARDPISKFAAYLLEHN-----LAEHEELKEID  
WP\_015785134.1 LTYRFRGHSLADPDELRAPDEKQFWG-ARDPITKLATYLVEHN-----LANSQELKDIE  
HAC62987.1 LTYRFRGHSLADPDELRDADEKEFWG-TRDPITKLATYLIEHN-----LANNQELKEIE  
WP\_107668403.1 LTYRFRGHSLADPDELRSSDEKQFWG-SKDPIQRLEAYLIEHN-----LANQNELNEIK  
WP\_008272481.1 LTYRFRGHSLADPDELRSPDEKQFWG-SKDPIQRLEAYLIEHN-----LVNQNELDEIK  
WP\_007307445.1 LTYRFRGHSLADPDELRSPDEKQFWG-NKDPIQRLEAYLIEHN-----LANQSELDEIK  
CCQ68831.1 LTYRFRGHSLADPDELRSPDEKQFWG-NKDPIQRLEAYLIEHN-----LANQSELDEIK  
WP\_009546784.1 LTYRFRGHSLADPDELRSPDEKQFWG-SKDPIQRLEAYLIEHN-----LANQSELDEIK  
WP\_012954145.1 LTYRFRGHSLADPDELRKLDEKKFWE-QKDPKQKLSNYLINQN-----IASQTELDTIQ  
KFF41119.1 LTYRFRGHSLADPDELRKSDEKKFWE-QKDPKQKLSNYLISQN-----IANQAEELDAIQ  
BAP17336.1 LTYRFRGHSLADPDELRSSDEKEFWG-EQDPIDKFITYLVEQN-----LANYQELLENIK  
WP\_044107560.1 LTYRFRGHSLADPDELRSSDEKEFWG-EQDPIDKFITYLVEQN-----LANYQELLENIK  
WP\_119259650.1 LTYRFRGHSLADPDELRSSDEKEFWG-GRDPIRQLATYLVEQN-----LADNQELLENIK  
WP\_012597993.1 LTYRFRGHSLADPDELRSSDEKQFWS-ARDPISRFGSFLLEHD-----LATQEEELTEIE  
WP\_013321798.1 LTYRFRGHSLADPDELRSSDEKQFWS-ARDPISRGLSYLLEHD-----LASQEDLTQIE  
WP\_193957256.1 LTYRFRGHSLADPDELRSADEKQFWG-ERDPITRFAAYLYERD-----LATREELKEIE  
WP\_072927057.1 LTYRFRGHSLADPDELRSADEKQFWG-ERDPITRFAAYLYERD-----LATREELKEIE  
NCR81902.1 LTYRFRGHSLADPDELRSADEKQFWG-ERDPITRFAAYLYERD-----LATREELKEIE  
WP\_002761057.1 LTYRFRGHSLADPDELRSADEKQFWG-ERDPITRFAAYLYERD-----LATREELKEIE  
NCQ98903.1 LTYRFRGHSLADPDELRSADEKQFWG-ERDPITRFAAYLYERD-----LATREELKEIE  
WP\_008200476.1 LTYRFRGHSLADPDELRSADEKQFWG-ERDPITRFAAYLYERD-----LATREELKEIE  
WP\_194017657.1 LTYRFRGHSLADPDELRSADEKQFWG-ERDPITRFAAYLYERD-----LATREELKEIE  
WP\_004160336.1 LTYRFRGHSLADPDELRSADEKQFWG-ERDPITRFAAYLYERD-----LATREELKEIE  
WP\_002733307.1 LTYRFRGHSLADPDELRSADEKQFWG-ERDPITRFAAYLYERD-----LATREELKEIE  
NCQ71341.1 LTYRFRGHSLADPDELRSADEKQFWG-ERDPITRFAAYLYERD-----LATREELKEIE  
NCR46358.1 LTYRFRGHSLADPDELRSADEKQFWG-ERDPITRFAAYLYERD-----LATREELKEIE  
WP\_002754242.1 LTYRFRGHSLADPDELRSADEKQFWG-ERDPITRFAAYLYERD-----LATREELKEIE  
WP\_016515468.1 LTYRFRGHSLADPDELRSADEKQFWG-ERDPITRFAAYLYERD-----LATREELKEIE  
WP\_150977446.1 LTYRFRGHSLADPDELRSADEKQFWG-ERDPITRFAAYLYERD-----LATREELKEIE  
NCR41533.1 LTYRFRGHSLADPDELRSADEKQFWG-ERDPITRFAAYLYERE-----LATREELKEIE



WP\_002749403.1 LTYRFRGHSLADPDELRSADEKQFWG-ERDPITRFAAYLYERD-----LATREELKEIE  
TRT57459.1 LTYRFRGHSLADPDELRSADEKQFWG-ERDPITRFAAYLYERD-----LATREELKEIE  
REJ39931.1 LTYRFRGHSLADPDELRSADEKQFWG-ERDPITRFAAYLYERD-----LATREELKEIE  
WP\_004163914.1 LTYRFRGHSLADPDELRSADEKQFWG-ERDPITRFAAYLYERD-----LATREELKEIE  
WP\_012267065.1 LTYRFRGHSLADPDELRSADEKQFWG-ERDPITRFAAYLYERD-----LATREELKEIE  
WP\_079209979.1 LTYRFRGHSLADPDELRSADEKQFWG-ERDPITRFAAYLYERD-----LATREELKEIE  
WP\_149985775.1 LTYRFRGHSLADPDELRSADEKQFWG-ERDPITRFAAYLYERD-----LATREELKEIE  
TRU85345.1 LTYRFRGHSLADPDKLRSADEKQFWG-ERDPITRFAAYLYERD-----LATREELKEIE  
TRT44999.1 LTYRFRGHSLADPDELRSADEKQFWG-ERDPITRFAAYLYERD-----LATREELKEIE  
WP\_158198932.1 LTYRFRGHSLADPDELRSADEKQFWG-ERDPITRFAAYLYEGD-----LATREELKEIE  
WP\_046662903.1 LTYRFRGHSLADPDELRSADEKQFWG-ERDPITRFAAYLYERD-----LATREELKEIE  
WP\_149976097.1 LTYRFRGHSLADPDELRSADEKQFWG-ERDPITRFAAYLYERD-----LATREELKEIE  
NCR70407.1 LTYRFRGHSLADPDELRSADEKQFWG-ERDPITRFAAYLYERD-----LATREELKEIE  
WP\_045358808.1 LTYRFRGHSLADPDELRSADEKQFWG-ERDPITRFAAYLYERD-----LATREELKEIE  
WP\_151695374.1 LTYRFRGHSLADPDELRSADEKQFWG-ERDPITRFAAYLYERD-----LATREELKEIE  
TRV09832.1 LTYRFRGHSLADPDELRSADEKQFWG-ERDPITRFAAYLYERD-----LATREELKEIE  
NCQ95828.1 LTYRFRGHSLADPDELRSADEKQFWG-ERDPITRFAAYLYERA-----LATREELKEIE  
WP\_190358292.1 LTYRFRGHSLADPDELRSADEKQFWG-ERDPITRFAAYLYERE-----LATREELKEIE  
TRV48295.1 LTYRFRGHSLADPDELRSADEKQFWG-ERDPITRFAAYLYERD-----LATREELKEIE  
AKE65761.1 LTYRFRGHSLADPDELRSADEKQFWG-ERDPITRFAAYLYERD-----LATREELKEIE  
WP\_106459100.1 LTYRFRGHSLADPDELRSPDEKQFWG-ARDPITRLAVYLVEHD-----LATQDELKAIE  
WP\_124973941.1 LTYRFRGHSLADPDELRSPDEKQFWG-GRDPIEKLGAFLVKNK-----LADQDELKAIE  
GBF79811.1 LTYRFRGHSLADPDELRSPDEKQFWG-GRDPIEKLGAFLVKNK-----LADQDELKAIE  
NJK57611.1 LTYRFRGHSLADPDELRSPDEKQFWG-KRDPICKKFATYLVQNN-----LATAEELKEIE  
WP\_106234908.1 LTYRFRGHSLADPDELRSPDEKQFWG-KRDPICKKFATYLVQNN-----LATAEELQEI  
WP\_096718081.1 LTYRFRGHSLADPDELRDPAEKEFWG-KRDPICKKFAAYMIEQN-----LATEAQLQEI  
MBE9044513.1 LTYRFRGHSLADPDELRDPAEKEFWG-KKDPICKKFAAYMIEHD-----LATADELKKID  
WP\_019509314.1 LTYRFRGHSLADPDELRDPTEKEFWG-QRDPICKKFADYMIKNN-----LASAAELKKID  
WP\_036485963.1 LTYRFRGHSLADPDELRSPPEEKEFWA-KRDPICKKFAAYITERN-----LASSELKEIE  
WP\_015195309.1 LTYRFRGHSLADPDELRSPPEEKEYWA-EKDPIERFAKYLVQNN-----LASSELKEIQ  
WP\_096384360.1 LTYRFRGHSLADPDELRSPPEEKEFWA-ERDPIERFAKYLVQNN-----LASSELKEIQ  
AUC59735.1 LTYRFRGHSLADPDELRDAKEKEFWN-ARDPICKKFAQYLTENN-----IVTQAELEDAID  
WP\_069789698.1 LTYRFRGHSLADPDELRDAKEKEFWN-ARDPICKKFAQYLTENN-----IVTQAELEDAID  
AFZ46314.1 LTYRFRGHSLADPDELRDAKEKEFWN-ARDPICKKFAQYLTENN-----IVTQAELEDAID  
WP\_193799498.1 LTYRFRGHSLADPDELRDAKEKEFWN-ARDPICKKFAQYLTENN-----IVTQAELEDAID  
MBF2056016.1 LTYRFRGHSLADPDELRDAKEKEFWN-ARDPICKKFAQYLTENN-----IVSQAELDAID  
WP\_066117996.1 LTYRFRGHSLADPDELRDPQEKQFWG-ARDPICKKFAKYLTENN-----IVTQAELEDAID  
WP\_017293986.1 LTYRFRGHSLADPDELRDPQEKQFWG-ARDPICKKFAKYLTENN-----IVTQAELEDAID  
WP\_066347165.1 LTYRFRGHSLADPDELRDATEKEFWN-ARDPICKKFAKYLTENN-----IVSQAELDAID  
WP\_155083330.1 LTYRFRGHSLADPDELRDPAEKEFWN-AKDPICKKFAKYITDNK-----IATREELDAID  
WP\_099435229.1 LTYRFRGHSLADPDELRDPAEKEFWN-AKDPICKKFAKYITDNK-----IATREELDAID  
WP\_015219261.1 LTYRFRGHSLADPDELRDPAEKEFWN-AKDPICKKFAKYITDNK-----IATREELDAID  
RMD72466.1 LTYRFRGHSLADPDELRDPAEKEFWN-AKDPICKKFAKYITDNK-----IATREELDAID  
WP\_190362127.1 LTYRFRGHSLADPDELRDPAEKEFWN-AKDPICKKFAKYITDNK-----IATREELDAID  
HIK38209.1 LTYRFRGHSLADPDELRSPPEEKEFWA-KKDPICKKFAKYITDNK-----VATKEELEAID  
RMF23776.1 LTYRFRGHSLADPDELRSPPEEKEFWA-ARDPIQRFKAYLTQKG-----IATQELKAID  
MBC6419205.1 LTYRFRGHSLADPDELRSTAEKEFWN-KKDPICKKFAAYLLELN-----LTAQELKAID  
MBE9169004.1 LTYRFRGHSLADPDELRSPPEEKEFWA-SRDPICKKFAAYLLELN-----LATAEELKEIE  
TVQ44863.1 LTYRFRGHSLADPDELRSPDEKEFWA-QKDPITRFTNYLLEQN-----LSTTEELKAID  
WP\_006530738.1 LTYRFRGHSLADPDELRSPAEKEFWG-ERDPICKKFAAYLLEQN-----LATSEELKQID  
NJJL01270.1 LTYRFRGHSLADPDELRAPDEKQAWF-ARDPICKKFAAYLLEQN-----LASHDELKAID  
WP\_062436458.1 LTYRFRGHSLADPDELRSAEKEFWA-QRDPICKKFAAYLLEQN-----LATAEELKAIE  
WP\_065711598.1 LTYRFRGHSLADPDELRSAEKEFWA-QRDPICKKFAAYLLEQN-----LATAEELKAIE  
WP\_030006129.1 LTYRFRGHSLADPDELRSAEKEFWA-QRDPICKKFAAYLLEQN-----LATAEELKAIE  
WP\_138073755.1 LTYRFRGHSLADPDELRSAEKEFWA-QRDPICKKFAAYLLEQN-----LATAEELKAIE  
WP\_012305987.1 LTYRFRGHSLADPDELRSAEKEFWA-QRDPICKKFAAYLLEQN-----LATAEELKAIE  
WP\_065715170.1 LTYRFRGHSLADPDELRSAEKEFWA-QRDPICKKFAAYLLEQN-----LATAEELKAIE  
WP\_024544584.1 LTYRFRGHSLADPDELRSAEKEFWA-QRDPICKKFAAYLLEQN-----LATAEELKAIE  
WP\_096418968.1 LTYRFRGHSLADPDELRSAEKEFWA-QRDPICKKFAAYLLEQN-----LATAEELKAIE  
WP\_075893823.1 LTYRFRGHSLADPDELRSPPEEKEFWA-KRDPITRFEKFLGRE-----LATADELKAIS  
WP\_015135286.1 LTYRFRGHSLADPDELRSAEKEFWA-KKDPITQFESFILGRK-----LATAEELKAIA  
WP\_194031122.1 LTYRFRGHSLADPDELRSAEKEFWA-ARDPITQFESFILGRK-----LVTSEELKEIE  
WP\_017306355.1 LTYRFRGHSLADPDELRSAPEKEFWL-SRDPICKKLAGQLIERN-----LASEEDLKQID  
WP\_040898162.1 LTYRFRGHSLADPDELRSAEKEFWA-TKDPITRFADYLTQKQ-----LATAQELKDLID  
ELS02452.1 LTYRFRGHSLADPDELRSAEKEFWA-TKDPITRFADYLTQKQ-----LATAQELKDLID  
WP\_169246577.1 LTYRFRGHSLADPDELRSAEKEFWA-QKDPICKKLAGQLIERN-----LTVSEELKAIE  
NMN45675.1 LTYRFRGHSLADPDELRSAEKEFWA-QKDPICKKLAGQLIERN-----LTVSEELKAIE  
WP\_144866471.1 LTYRFRGHSLADPDELRSEKEKEFWA-SKDPICKKLAGQLIERN-----LTVSEELKAIE  
WP\_072619621.1 LTYRFRGHSLADPDELRSAEKEFWA-SRDPICKKLAGQLIERN-----LATAEELKAIE

TVQ55241.1 LTYRFRGHSLADPDELRLDPAEKERWG-ARDPIQRFAQYLQDRG-----LATAAELEAID  
NEO83235.1 LTYRFRGHSLADPDELRSSEEKEFWL-SRDPIKRLARYLNEQN-----LATTEELQEID  
NEO27677.1 LTYRFRGHSLADPDELRAAEEKQFWQ-ARDPIKRLAAQLIERE-----LATEEELKEID  
WP\_190720640.1 LTYRFRGHSLADPDELRSPEEKETWM-ARDPIKLEAYLLEQD-----LATKQELSDIE  
WP\_015228871.1 LTYRFRGHSLADPDELRSPEEKETWM-ARDPIKLEAYLLEQD-----LATKQELSDIE  
PNW56863.1 LTYRFRGHSLADPDELRSPEEKETWM-ARDPIKLEAYLLEQD-----LATKQELSDIE  
WP\_015226684.1 LTYRFRGHSLADPDELRSPEEKETWM-ARDPIKLEAYLLEQD-----LATKQELSDIE  
WP\_146294756.1 LTYRFRGHSLADPDELRSPEEKETWM-ARDPIKLEAYLLEQD-----LATKQELSDIE  
PSO48609.1 LTYRFRGHSLADPDELRSPEEKETWM-ARDPIKLEAYLLEQD-----LATKQELSDIE  
PSP33003.1 LTYRFRGHSLADPDELRSPEEKETWM-ARDPIKLEAYLLEQD-----LATKQELSDIE  
PSP12402.1 LTYRFRGHSLADPDELRSPEEKETWM-ARDPIKLEAYLLEQD-----LATKQELSDIE  
PSO52938.1 LTYRFRGHSLADPDELRSPEEKETWM-ARDPIKLEAYLLEQD-----LATKQELSDIE  
PSO90333.1 LTYRFRGHSLADPDELRSPEEKETWM-ARDPIKLEAYLLEQD-----LATKQELSDIE  
PSO63160.1 LTYRFRGHSLADPDELRSPEEKETWM-ARDPIKLEAYLLEQD-----LATKQELSDIE  
PSO77552.1 LTYRFRGHSLADPDELRSPEEKETWM-ARDPIKLEAYLLEQD-----LATKQELSDIE  
PSP13031.1 LTYRFRGHSLADPDELRSPEEKETWM-ARDPIKLEAYLLEQD-----LATKQELSDIE  
PSO85957.1 LTYRFRGHSLADPDELRSPEEKETWM-ARDPIKLEAYLLEQD-----LATKQELSDIE  
PSP19442.1 LTYRFRGHSLADPDELRSPEEKETWM-ARDPIKLEAYLLEQD-----LATKQELSDIE  
WP\_022607853.1 LTYRFRGHSLADPDELRSPEEKETWM-ARDPIKLEAYLLEQD-----LATKQELSDIE  
RMG11319.1 LTYRFRGHSLADPDELRSPEEKETWM-ARDPIKLEAYLLEQD-----LATKQELSDIE  
MBE9041924.1 LTYRFRGHSLADPDELRSPEEKETWM-ARDPIKLEAYLLEQD-----LATKQELSDIE  
CAA9581709.1 LTYRFRGHSLADPDELRSPEEKETWM-ARDPIKLEAYLLEQD-----LATKQELSDIE  
NET88172.1 LTYRFRGHSLADPDELRSPEEKETWM-ARDPIKLEAYLLEQD-----LATKQELSDIE  
WP\_096582670.1 LTYRFRGHSLADPDELRSPEEKETWM-ARDPIKLEAYLLEQD-----LATKQELSDIE  
BBD62511.1 LTYRFRGHSLADPDELRSPEEKETWM-ARDPIKLEAYLLEQD-----LATKQELSDIE  
WP\_015111181.1 LTYRFRGHSLADPDELRSPEEKETWM-ARDPIKLEAYLLEQD-----LATKQELSDIE  
WP\_193891391.1 LTYRFRGHSLADPDELRSPEEKETWM-ARDPIKLEAYLLEQD-----LATKQELSDIE  
WP\_190701517.1 LTYRFRGHSLADPDELRSPEEKETWM-ARDPIKLEAYLLEQD-----LATKQELSDIE  
WP\_190690809.1 LTYRFRGHSLADPDELRSPEEKETWM-ARDPIKLEAYLLEQD-----LATKQELSDIE  
WP\_190593551.1 LTYRFRGHSLADPDELRSPEEKETWM-ARDPIKLEAYLLEQD-----LATKQELSDIE  
WP\_190966685.1 LTYRFRGHSLADPDELRSPEEKETWM-ARDPIKLEAYLLEQD-----LATKQELSDIE  
WP\_062289815.1 LTYRFRGHSLADPDELRSPEEKETWM-ARDPIKLEAYLLEQD-----LATKQELSDIE  
WP\_193882135.1 LTYRFRGHSLADPDELRSPEEKETWM-ARDPIKLEAYLLEQD-----LATKQELSDIE  
MBH8575714.1 LTYRFRGHSLADPDELRSPEEKETWM-ARDPIKLEAYLLEQD-----LATKQELSDIE  
RCJ37322.1 LTYRFRGHSLADPDELRSPEEKETWM-ARDPIKLEAYLLEQD-----LATKQELSDIE  
MBH8552742.1 LTYRFRGHSLADPDELRSPEEKETWM-ARDPIKLEAYLLEQD-----LATKQELSDIE  
WP\_198122843.1 LTYRFRGHSLADPDELRSPEEKETWM-ARDPIKLEAYLLEQD-----LATKQELSDIE  
WP\_096558676.1 LTYRFRGHSLADPDELRSPEEKETWM-ARDPIKLEAYLLEQD-----LATKQELSDIE  
WP\_069072716.1 LTYRFRGHSLADPDELRSPEEKETWM-ARDPIKLEAYLLEQD-----LATKQELSDIE  
WP\_181932097.1 LTYRFRGHSLADPDELRSPEEKETWM-ARDPIKLEAYLLEQD-----LATKQELSDIE  
WP\_196525306.1 LTYRFRGHSLADPDELRSPEEKETWM-ARDPIKLEAYLLEQD-----LATKQELSDIE  
MBC6431613.1 LTYRFRGHSLADPDELRSPEEKETWM-ARDPIKLEAYLLEQD-----LATKQELSDIE  
WP\_100898852.1 LTYRFRGHSLADPDELRSPEEKETWM-ARDPIKLEAYLLEQD-----LATKQELSDIE  
WP\_118166067.1 LTYRFRGHSLADPDELRSPEEKETWM-ARDPIKLEAYLLEQD-----LATKQELSDIE  
WP\_190731604.1 LTYRFRGHSLADPDELRSPEEKETWM-ARDPIKLEAYLLEQD-----LATKQELSDIE  
WP\_190940265.1 LTYRFRGHSLADPDELRSPEEKETWM-ARDPIKLEAYLLEQD-----LATKQELSDIE  
WP\_094348061.1 LTYRFRGHSLADPDELRSPEEKETWM-ARDPIKLEAYLLEQD-----LATKQELSDIE  
WP\_109010137.1 LTYRFRGHSLADPDELRSPEEKETWM-ARDPIKLEAYLLEQD-----LATKQELSDIE  
WP\_190911887.1 LTYRFRGHSLADPDELRSPEEKETWM-ARDPIKLEAYLLEQD-----LATKQELSDIE  
WP\_179068144.1 LTYRFRGHSLADPDELRSPEEKETWM-ARDPIKLEAYLLEQD-----LATKQELSDIE  
WP\_104909621.1 LTYRFRGHSLADPDELRSPEEKETWM-ARDPIKLEAYLLEQD-----LATKQELSDIE  
WP\_094333240.1 LTYRFRGHSLADPDELRSPEEKETWM-ARDPIKLEAYLLEQD-----LATKQELSDIE  
WP\_104900694.1 LTYRFRGHSLADPDELRSPEEKETWM-ARDPIKLEAYLLEQD-----LATKQELSDIE  
WP\_094346225.1 LTYRFRGHSLADPDELRSPEEKETWM-ARDPIKLEAYLLEQD-----LATKQELSDIE  
WP\_193948919.1 LTYRFRGHSLADPDELRSPEEKETWM-ARDPIKLEAYLLEQD-----LATKQELSDIE  
WP\_012411829.1 LTYRFRGHSLADPDELRSPEEKETWM-ARDPIKLEAYLLEQD-----LATKQELSDIE  
WP\_190933528.1 LTYRFRGHSLADPDELRSPEEKETWM-ARDPIKLEAYLLEQD-----LATKQELSDIE  
WP\_114080372.1 LTYRFRGHSLADPDELRSPEEKETWM-ARDPIKLEAYLLEQD-----LATKQELSDIE  
WP\_196518854.1 LTYRFRGHSLADPDELRSPEEKETWM-ARDPIKLEAYLLEQD-----LATKQELSDIE  
WP\_162399291.1 LTYRFRGHSLADPDELRSPEEKETWM-ARDPIKLEAYLLEQD-----LATKQELSDIE  
WP\_194004708.1 LTYRFRGHSLADPDELRSPEEKETWM-ARDPIKLEAYLLEQD-----LATKQELSDIE  
WP\_191759035.1 LTYRFRGHSLADPDELRSPEEKETWM-ARDPIKLEAYLLEQD-----LATKQELSDIE  
WP\_063873179.1 LTYRFRGHSLADPDELRSPEEKETWM-ARDPIKLEAYLLEQD-----LATKQELSDIE  
WP\_006197352.1 LTYRFRGHSLADPDELRSPEEKETWM-ARDPIKLEAYLLEQD-----LATKQELSDIE  
TVP61084.1 LTYRFRGHSLADPDELRSPEEKETWM-ARDPIKLEAYLLEQD-----LATKQELSDIE  
WP\_089090403.1 LTYRFRGHSLADPDELRSPEEKETWM-ARDPIKLEAYLLEQD-----LATKQELSDIE  
WP\_194000602.1 LTYRFRGHSLADPDELRSPEEKETWM-ARDPIKLEAYLLEQD-----LATKQELSDIE  
MBE9049769.1 LTYRFRGHSLADPDELRSPEEKETWM-ARDPIKLEAYLLEQD-----LATKQELSDIE  
MBI1242206.1 LTYRFRGHSLADPDELRSPEEKETWM-ARDPIKLEAYLLEQD-----LATKQELSDIE

QOV21329.1 LTYRFRGHSLADPDELSKAEKDFWF-SRDPIKLLAAYLIEQN-----LAEAEALKAID  
WP\_103135995.1 LTYRFRGHSLADPDELSKAEKDFWF-SRDPIKLLAAYLIEQN-----LADEAEALKAID  
HFS08569.1 LTYRFRGHSLADPDELSKAEKEFWF-SRDPIKLLAAYLIEQK-----LADEAEALKAIE  
WP\_190699019.1 LTYRFRGHSLADPDELSKAEKEFWF-SRDPIKLLAAYLIEQN-----LADEAEALKAIE  
WP\_066383537.1 LTYRFRGHSLADPDELSKAEKEFWF-SRDPIKLLGAYLIENN-----LADEAEALKAIE  
WP\_015138839.1 LTYRFRGHSLADPDELSKDEKEFWF-SRDPIKLLGTYLVEQN-----LADAAELKDIE  
WP\_015132096.1 LTYRFRGHSLADPDEMRKAEKEFWF-ARDPIKLLAAYLIEQN-----LADQEEELKAIE  
WP\_017653143.1 LTYRFRGHSLADPDEMRKAEKEFWF-ARDPIKLLGAYLIEQN-----LADQEEELKAIE  
WP\_190567951.1 LTYRFRGHSLADPDEMRKAEKEFWF-SRDPIKLLAAYLIEQN-----LADEAEALKAIE  
WP\_010996861.1 LTYRFRGHSLADPDEMRKAEKEFWF-SRDPIKLLAAYLIEQN-----LADEAEALKAIE  
WP\_190407812.1 LTYRFRGHSLADPDEMRKAEKEFWF-SRDPIKLLGAYLIEQN-----LADEAEALKAIE  
WP\_067764458.1 LTYRFRGHSLADPDELSKKEEKEFWF-PRDPIKLLGNYLIEQN-----LATEAEALKAIE  
WP\_190476982.1 LTYRFRGHSLADPDELRTKDEKEFWF-SRDPIKLLANYLIEQN-----LATEAEALKDIE  
WP\_179049495.1 LTYRFRGHSLADPDEMRKDEKEFWF-SRDPIKLLAAYLIEQN-----LADEAEALKAIE  
WP\_193935845.1 MTYRFRGHSLADPDELSKKEEKEFWF-ARDPIKLLAAYLLEHD-----LATEAEALKDVE  
WP\_104389397.1 MTYRFRGHSLADPDELSKKEEKEFWF-ARDPIKLLAAYLLKHD-----LATEAEALKDVE  
WP\_168653383.1 LTYRFRGHSLADPDEMRKKEEKEFWF-ARDPIKLLAAYLLEQN-----LATEAEALKDIE  
WP\_015083169.1 LTYRFRGHSLADPDEMRKAEKEFWF-ARDPIKLLAAYLLEQN-----LATEAEALKDIE  
WP\_168696462.1 LTYRFRGHSLADPDEMRKKEEKEFWF-ARDPIKLLAGYLVEQN-----LATEAEALKDIE  
WP\_168633934.1 LTYRFRGHSLADPDEMRKKEEKEFWF-ARDPIKLLAGYLVEQN-----LAKEAEALKDIE  
WP\_148760036.1 LTYRFRGHSLADPDEMRKKEEKEFWF-ARDPIKLLAGYLLEQN-----LATEAEALKDIE  
WP\_053540556.1 LTYRFRGHSLADPDEMRKKEEKEFWF-ARDPIKLLAGYLVEQN-----LATEAEALKDIE  
OBQ33598.1 MTYRFRGHSLADPDEMRKKEEKEFWF-ARDPIKLLAGYLVEQN-----LATEAEALKDIE  
WP\_168504304.1 MTYRFRGHSLADPDEMRKAEKEFWF-ARDPIKLLAAYLVEQN-----LATEAEALKDIE  
WP\_168498254.1 MTYRFRGHSLADPDELSKKEEKDFWF-ARDPIKLLAAYLLEHD-----LATEAEALKDIE  
WP\_193848024.1 MTYRFRGHSLADPDELSKKEEKEFWF-ARDPIKLLAGYLLEQN-----LATEAEALKDIE  
WP\_190392458.1 MTYRFRGHSLADPDELSKKEEKEFWF-ARDPIKLLAGYLLEQN-----LATEAEALKDIE  
WP\_137909555.1 MTYRFRGHSLADPDELSKKEEKEFWF-ARDPIKLLAGYLLEQN-----LATEAEALKDIE  
MBD1211506.1 MTYRFRGHSLADPDELSKKEEKEFWF-ARDPIKLLAGYLLEQN-----LATEAEALKDIE  
WP\_028090740.1 MTYRFRGHSLADPDELSKKEEKEFWF-ARDPIKLLAGYLLEQN-----LATEAEALKDIE  
MBD1217911.1 MTYRFRGHSLADPDELSKKEEKEFWF-ARDPIKLLAGYLLEQN-----LATEAEALKDIE  
WP\_190385598.1 MTYRFRGHSLADPDELSKKEEKEFWF-ARDPIKLLAGYLLEQN-----LATEAEALKDIE  
OBQ40682.1 MTYRFRGHSLADPDELSKKEEKEFWF-ARDPIKLLAGYLLEQN-----LATEAEALKDI-  
WP\_028083643.1 MTYRFRGHSLADPDELSKKEEKEFWF-ARDPIKLLAAYLLEHD-----LATEAEALKDVE  
WP\_096668532.1 MTYRFRGHSLADPDELSKKEEKEFWF-ARDPIKLLAAYLVEQN-----LATEAEALKDVE  
WP\_168642721.1 MTYRFRGHSLADPDELSKKEEKDFWF-ARDPIKLLAGYLVEQN-----LATEAEALKDVE  
WP\_193964707.1 MTYRFRGHSLADPDELSKKEEKEFWF-ARDPIKLLAGYLLEQN-----LATEAEALKDVE  
WP\_027404647.1 MTYRFRGHSLADPDELSKKEEKEFWF-ARDPIKLLAGYLLEQN-----LATEAEALKDVE  
WP\_039199282.1 MTYRFRGHSLADPDELSKKEEKEFWF-ARDPIKLLAGYLLEQN-----LATEAEALKDVE  
WP\_193897026.1 MTYRFRGHSLADPDELSKKEEKEFWF-ARDPIKLLAGYLLEQN-----LATEAEALKDVE  
WP\_190720595.1 MTYRFRGHSLADPDELSKAEKEFWF-ARDPIKLLAAYLLEKN-----LADESELKAIE  
WP\_127054992.1 MTYRFRGHSLADPDELSKAEKEFWF-ARDPIKLLAAYLLEKN-----LADESELKAIE  
WP\_071191191.1 MTYRFRGHSLADPDELSKAEKEFWF-ARDPIKLLAAYLLEKN-----LADESELKAIE  
WP\_190906101.1 MTYRFRGHSLADPDELSKAEKEFWF-ARDPIKLLAAYLLEKN-----LADESELKAIE  
WP\_016951883.1 MTYRFRGHSLADPDELSKAEKEFWF-ARDPIKLLAAYLLEKN-----LADESELKAIE  
WP\_015213298.1 MTYRFRGHSLADPDELSKKEEKEFWF-ARDPIKLLAAYLLEKK-----LADEAEALKGV  
WP\_190463295.1 MTYRFRGHSLADPDELSKAEKDFWF-ARDPIKLLAADLLEKK-----LVDEAEALKAIE  
WP\_015205680.1 MTYRFRGHSLADPDELSKAEKDFWF-ARDPIKLLAADLLEKK-----LVDEAEALKAIE  
BAZ31042.1 LTYRFRGHSLADPDELSKAEKEFWF-ARDPIKLLAAYLLETK-----LADQAEALKDIE  
WP\_190606846.1 LTYRFRGHSLADPDELSKDEKDFWF-ARDPIKLLAAYLLEHD-----LATEAEALKAIE  
TAE58212.1 LTYRFRGHSLADPDELSKKEEKEFWF-SRDPIKLLGAYLVDNN-----LATSSSELKIE  
NET02236.1 LTYRFRGHSLADPDELSKKEEKELWF-SRDPIKRLGTYLVEQN-----LATPAELKEID  
WP\_190564176.1 MTYRFRGHSLADPDELSKKEEKEFWF-SRDPIKLLAAYLVEQN-----LATEAEALKDIE  
TAF05332.1 MTYRFRGHSLADPDELSKKEEKEFWF-SRDPIKLLAAYLLEKN-----LATEAEALKDID  
WP\_193943872.1 LTYRFRGHSLADPDELSKKEEKDFWF-SRDPIKLLGAYLVEHN-----LATEAEALKDIE  
WP\_137666483.1 LTYRFRGHSLADPDELSKKEEKDFWF-SRDPIKLLGAYLVEHN-----LATEAEALKDIE  
WP\_096571175.1 LTYRFRGHSLADPDELSKKEEKDFWF-SRDPIKLLGAYLVEHN-----LATEAEALKDIE  
WP\_194056938.1 LTYRFRGHSLADPDELSKKEEKDFWF-SRDPIKLLGAYLVEHN-----LATEAEALKDVE  
WP\_006276818.1 LTYRFRGHSLADPDELSKKEEKEFWF-SRDPIKLLGAYLVEHN-----LAVESDLKQIE  
WP\_057177062.1 LTYRFRGHSLADPDELSKKEEKEFWF-SRDPIKLLGAYLVEHN-----LAVESDLKQIE  
WP\_096546888.1 LTYRFRGHSLADPDELSKKEEKEFWF-SRDPIKLLGAYLVEHN-----LAVESDLKQIE  
WP\_187706993.1 LTYRFRGHSLADPDELSKKEEKEFWF-SRDPIKLLGAYLVEHN-----LAVESDLKQIE  
WP\_009343327.1 LTYRFRGHSLADPDELSKKEEKEFWF-SRDPIKLLGAYLVEHN-----LAVESDLKQIE  
WP\_061544967.1 LTYRFRGHSLADPDELSKKEEKEFWF-SRDPIKLLGGYLVEHN-----LAVESDLKQIE  
WP\_013191125.1 MTYRFRGHSLADPDELSKKEEKEYWF-SRDPIKLLATYLVEQN-----LATGEELKAIE  
WP\_190368223.1 LTYRFRGHSLADPDELSKKEEKEFWF-SRDPIKLLGAYLIENN-----LATTDELKGV  
WP\_035153086.1 LTYRFRGHSLADPDELSKKEEKDFWF-SRDPIKLLATYLTEQN-----LATAAEALKAID  
WP\_086837540.1 LTYRFRGHSLADPDELSKAEKEFWF-ARDPIKLLAAYLVEHN-----LADQEEELKAID  
WP\_086683742.1 LTYRFRGHSLADPDEMRKAEKEFWF-ARDPIKLLAAYLVEHN-----LADQEEELKAID

WP\_086763013.1 LTYRFRGHSLADPDELRSKAEKEFWF-ARDPIKLLAAYLVEHN-----LADHEELK AID  
WP\_096590017.1 LTYRFRGHSLADPDELRSKAEKEFWF-ARDPIKLLAAYLVEHN-----LADQEEELK GID  
WP\_096579317.1 LTYRFRGHSLADPDELRSKAEKEFWF-ARDPIKLLAAYLVEHN-----LSDQEEELK GID  
WP\_045874564.1 LTYRFRGHSLADPDELRSKAEKEFWF-ARDPIKLLAAYLVEHN-----LSDQEEELK GID  
WP\_190655979.1 LTYRFRGHSLADPDELRSKAEKEFWF-ARDPIKLLAAYLIEHS-----LSDQEEELK GID  
WP\_190586334.1 LTYRFRGHSLADPDELRSKAEKEFWF-ARDPIKLLAAYLVEHN-----LSDQEEELK GID  
WP\_167720171.1 LTYRFRGHSLADPDELRSKAEKEFWF-ARDPIKLLAAYLIEHN-----LSDQEEELK GID  
WP\_190616216.1 LTYRFRGHSLADPDELRSKAEKEFWF-ARDPIKLLAAYLIEHN-----LSDQEEELK GID  
WP\_096598886.1 LTYRFRGHSLADPDELRSKAEKEFWF-ARDPIKLLAAYLVEQN-----LTDSEELK GID  
WP\_190634164.1 LTYRFRGHSLADPDELRSKAEKEFWF-ARDPIKLLAAYLVEHN-----LSTQEEELK DID  
WP\_096647267.1 LTYRFRGHSLADPDELRSKAEKEFWF-ARDPIKLLAAYLVEHN-----LSTQEEELK DID  
WP\_190550899.1 LTYRFRGHSLADPDELRSKAEKEFWF-ARDPIKLLAAYLVEHN-----LSTQEEELK DID  
WP\_190749941.1 LTYRFRGHSLADPDELRSKAEKEFWF-ARDPIKLLAAYLVEHN-----LATQEEELK DID  
NJM70511.1 LTYRFRGHSLADPDELRTKAEKEFWF-ARDPIKRKFATYLVEQN-----LASHEELK AID  
WP\_169218573.1 LTYRFRGHSLADPDELRSKTEKEFWF-ARDPIKRFAAYLVEQN-----LTSEEELK AID  
WP\_017316476.1 LTYRFRGHSLADPDEMRSKAEKEFWF-ARDPVKKFAAYLVEQN-----LTSHEELK AID  
WP\_048871324.1 LTYRFRGHSLADPDELRSKAEKEFWF-ARDPIKLLATYLVEQN-----LASGEELK AID  
WP\_169154974.1 LTYRFRGHSLADPDELRSKAEKEFWF-ARDPIKLLAAYLVEQN-----LSTQEEELK DID  
WP\_169264431.1 LTYRFRGHSLADPDELRTKPEKEFWF-ARDPIKFFAAYLIEQN-----LASSEELK S ID  
WP\_073634002.1 LTYRFRGHSLADPDELRSKAEKEFWF-ARDPIKLLAAYMVEQN-----LASHEELK A VD  
WP\_096562148.1 LTYRFRGHSLADPDELRSKAEKEFWF-ARDPIKLLAAYMVEQN-----LASHEELK A VD  
WP\_041035191.1 LTYRFRGHSLADPDELRSKAEKEFWF-ARDPIKFFAAYMVEQN-----LASHEELK A VD  
ARV60348.1 LTYRFRGHSLADPDELRTKTEKEYWF-ARDPIKFFAAYLVEHN-----LSSEEELK N ID  
WP\_017744791.1 LTYRFRGHSLADPDEMRSKQEKEFWF-SRDPICKFFAAYLVEQN-----LASSEELK D ID  
WP\_155745622.1 LTYRFRGHSLADPDEMRSKQEKEFWF-SRDPICKFFAAYLVEQN-----LASSEELK D ID  
WP\_038084927.1 LTYRFRGHSLADPDEMRTKQEKEYWF-SRDPICKFFASYLVEQN-----LASSEELK D ID  
WP\_009756662.1 LTYRFRGHSLADPDELRSKDEKEFWF-ARDPIKFFAAYLTERN-----LATAEELKE I D  
WP\_114707683.1 LTYRFRGHSLADPDELRSKDEKEFWF-ARDPIKFFAAYLTERN-----LATAEELKE I D  
WP\_102175997.1 LTYRFRGHSLADPDELRSKDEKEFWF-ARDPIKFFAAYLTERN-----LATAEELKE I D  
WP\_062248711.1 LTYRFRGHSLADPDELRSKDEKEFWF-ARDPIKFFAAYLTERN-----LATAEELKE I D  
WP\_102152677.1 LTYRFRGHSLADPDELRSKDEKEFWF-ARDPIKFFAAYLTERN-----LATAEELKE I D  
WP\_102174883.1 LTYRFRGHSLADPDELRSKDEKEFWF-ARDPIKFFAAYLTERN-----LATAEELKE I D  
WP\_016868968.1 LTYRFRGHSLADPDELRSKDEKEFWF-ARDPIKFFAAYLTERN-----LATTEELKE I D  
WP\_026720629.1 LTYRFRGHSLADPDELRTKDEKEFWF-SRDPICKFFAAYLTEKN-----LATTEELKE I D  
WP\_053456301.1 LTYRFRGHSLADPDELRTKDEKEFWF-SRDPICKFFAAYLTEKN-----LATTEELKE I D  
RAM50950.1 LTYRFRGHSLADPDELRTKDEKEYWF-SRDPICKFFAAYLTEKN-----LATTEQLKE I D  
WP\_017312723.1 LTYRFRGHSLADPDELRTKDEKEYWF-SRDPICKFFAAYLTEKN-----LATAEQLKE I D  
WP\_096676223.1 LTYRFRGHSLADPDELRTKDEKEYWF-SRDPICKFFAAYLTEKN-----LATAEELK D ID  
WP\_016860018.1 LTYRFRGHSLADPDELRTKDEKEYWF-SRDPICKFFAAYLTERN-----LATAEELKE I D  
MBF2006992.1 LTYRFRGHSLADPDELRSKTEKEFWF-ARDPIKFFAAYLTEQN-----LATDEELK Q ID  
WP\_016873792.1 LTYRFRGHSLADPDELRSKTEKEFWF-ARDPIKFFAAYLTEQN-----LATDEELK Q ID  
NWF60727.1 LTYRFRGHSLADPDELRSKAEKEFWF-ARDPIKFFAAYLTEQN-----LTTDQELKE I D  
WP\_026732160.1 LTYRFRGHSLADPDELRSKAEKEFWF-ARDPIKFFAAYLTEQN-----LTTDQELKE I D  
NRB06339.1 LTYRFRGHSLADPDELRSKQEKEFWF-SRDPICKFFAAYVTEQN-----LVTQEEELK A ID  
CDN10094.1 LTYRFRGHSLADPDELRSKWEKEEWF-SRDPICKFFAAYVTEQN-----LVTQEEELK A ID  
WP\_088242960.1 LTYRFRGHSLADPDELRSKTEKEEWF-SRDPICKKFATYVTEKN-----LVTQEEELK T ID  
WP\_008231351.1 LTYRFRGHSLADPDELRSKSEKEEWF-LRDPICKFFAAYVTEIG-----LATQEEELK A ID  
WP\_099069415.1 LTYRFRGHSLADPDELRSKAEKEFWF-ARDPIKLLAAYLVGHN-----LATEEELK G ID  
WP\_185563393.1 LTYRFRGHSLADPDELRSKAEKEFWF-ARDPIKLLAAYLVGHN-----LATEEELK G IN  
WP\_096535312.1 LTYRFRGHSLADPDELRSKAEKEFWF-ARDPIKLLAAHLLEQN-----LASEEEIK G ID  
RCJ22421.1 LTYRFRGHSLADPDELRSKAEKEFWF-ARDPIKLLAAHLLEQN-----LASEEELK G ID  
WP\_190957034.1 LTYRFRGHSLADPDELRSKAEKEFWF-ARDPIKLLAAHLLEQN-----LADEQEELK G ID  
WP\_190879218.1 LTYRFRGHSLADPDEMRSKAEKEFWF-ARDPIKLLAAYLLEQN-----LADEQE I K G ID  
WP\_193918664.1 LTYRFRGHSLADPDEMRSKAEKEFWF-ARDPIKLLAAYLLEQN-----LADEQE I K D ID  
WP\_073642882.1 LTYRFRGHSLADPDEMRSKAEKEFWF-ARDPIKLLAAYLLEQN-----LADEEE I K A ID  
WP\_138499289.1 LTYRFRGHSLADPDEMRSKSEKEFWF-ARDPIKLLAAYLIKQN-----LADEEE I K G ID  
WP\_039752681.1 LTYRFRGHSLADPDEMRSQAEEKEFWF-ARDPIKLLANHLIEQN-----LASAEELK A ID  
WP\_089127894.1 LTYRFRGHSLADPDEMRSQAEEKEFWF-ARDPIKLLANHLVEQN-----LASAEELK A ID  
WP\_029635771.1 LTYRFRGHSLADPDEMRSQAEEKDFWF-ARDPIKLLANYLVEEN-----LASAEELK A ID  
WP\_190826011.1 LTYRFRGHSLADPDELRTKSEKEFWF-ARDPIKLLANYLVEQN-----LAEPEELK A ID  
NJM23205.1 LTYRFRGHSLADPDEMRSKEEKEFWF-SRDPICKFFAGYLIEQN-----LASQEEELK S ID  
MBF2016127.1 LTYRFRGHSLADPDEMRSKEEKEFWF-SRDPICKFFAGYLIEQN-----LASQEEELK G ID  
WP\_193922897.1 LTYRFRGHSLADPDEMRSKEEKEFWF-SRDPICKFFAAYLVEQN-----LASQEEELK N ID  
WP\_096659444.1 LTYRFRGHSLADPDEMRSKEEKEFWF-SRDPICKFFAAYLIEQN-----LASQEEELK G IE  
WP\_015116622.1 LTYRFRGHSLADPDEMRSKEEKEFWL-SRDPICKFFAAYLVEQN-----LASQEEELK D IE  
WP\_027847037.1 LTYRFRGHSLADPDEMRTQDEKEYWF-SRDPICKFFAAYLQEQN-----LASQGE I K S ID  
OWY69142.1 LTYRFRGHSLADPDELRTKTEKEFWF-ARDPIIRLAAYLVEQN-----LAQQEELK A ID  
WP\_192157597.1 LTYRFRGHSLADPDELRTKTEKEFWF-ARDPIIRLAAYLVEQN-----LAQQEELK A ID  
WP\_015153409.1 LTYRFRGHSLADPDELRTKTEKEFWF-ARDPIIRLAAYLVEQN-----LAQQEELK A ID

WP\_127025001.1 LTYRFRGHSLADPDELRSKKEEFWF-ARDPIKRLAAYLVEQN-----LAQQEELKAI  
WP\_039715561.1 LTYRFRGHSLADPDELRTKTEKEFWF-ARDPIKRLAAYLVEQN-----LVQQEELKAI  
HCF28840.1 LTYRFRGHSLADPDEMRSAEKEFWF-SRDPKRLAAYLSEQN-----LAQQEDFKAIE  
NJR14483.1 LTYRFRGHSLADPDELSKKEKDFWL-ARDPIKRLRNQLIERK-----LATEEELKAI  
WP\_095723576.1 LTYRFRGHSLADPDELSKKEEKEFWF-ARDPIKRLRSQLIERK-----LATEEELKAI  
BAZ42970.1 LTYRFRGHSLADPDELSKKEEKEFWF-ARDPIKRLRNQLIERN-----LATEEELKAI  
WP\_015199024.1 LTYRFRGHSLADPDELSKKEEKEFWL-ARDPIKRLAGQLVDMN-----LATAEELKAI  
WP\_127085798.1 LTYRFRGHSLADPDELSKKEEKEFWF-ARDPIKRLASELIERK-----LATADELKAI  
WP\_073620834.1 LTYRFRGHSLADPDELSKKEEKEFWF-ARDPIKRLASELICKR-----LATANELKAI  
WP\_019489774.1 LTYRFRGHSLADPDELSKKEEKEFWF-ARDPIKRLASELIERK-----LVTADELKAI  
WP\_096687445.1 LTYRFRGHSLADPDELSKKEEKEFWF-ARDPIKRLANELQTRK-----LATAKELKAI  
BAZ11046.1 LTYRFRGHSLADPDELSKKEEKEFWF-ARDPIKRLANELQTRK-----LATAKELKAI  
MBF2067364.1 LTYRFRGHSLADPDELSKKEEKEFWF-ARDPIKRLAQQLIDRK-----LATELELKAI  
WP\_096622037.1 LTYRFRGHSLADPDELRKKEEKEFWF-SRDPKRLATYLVEHQ-----LATSEELKAI  
WP\_071455750.1 LTYRFRGHSLADPDELSKKEEKEFWL-SRDPKRLGSLYLEQD-----LVTSQDLKTID  
WP\_071516716.1 LTYRFRGHSLADPDELDRKKEEKEFWL-SRDPKRLAAYLVEQN-----LANQEELQAI  
WP\_063715838.1 LTYRFRGHSLADPDELSKKEEKEIWF-SRDPKRLHFRFENYLTEEN-----LASAEELKEIQ  
WP\_017662830.1 LTYRFRGHSLADPDELSKKEEKEIWF-SRDPKRLHFRFENYLTEEN-----LASAEELKDIQ  
WP\_159787611.1 LTYRFRGHSLADPDELSKKEEKEVWF-ARDPINRFETFLTSNH-----LANSEELQDIQ  
WP\_170190691.1 LTYRFRGHSLADPDELSKKEEKEIWF-ARDPINRFENFLTSNN-----LAKAEELKEIQ  
WP\_068790471.1 LTYRFRGHSLADPDELSKKEEKEIWF-ARDPINRFETFLTENN-----LANSEEELEEIK  
KPQ38392.1 LTYRFRGHSLADPDELSKKEEKEIWF-ARDPINRFETFLTENN-----LVNSEEELEEIK  
TAN98810.1 LTYRFRGHSLADPDELSKKEEKEIWF-ARDPINRFERFLTENN-----LVNSEELEAIK  
NJNI62552.1 LTYRFRGHSLADPDELSKQEEKDIWF-ARDPIKRLRFENYMLEHN-----LATEADFKAVK  
TAF56911.1 LTYRFRGHSLADPDELSKQEEKDIWF-ARDPIKRLRFENYMLEHN-----LATEADFKDVR  
WP\_199250058.1 LTYRFRGHSLADPDELSKKEEKEFWQ-ARDPIKRLFASYLIEHN-----LSTQDELKQID  
HGG00548.1 LTYRFRGHSLADPDELSKKEEKEFWQ-ARDPIKRLFASYLIEHN-----LSTQDELKQID  
WP\_190879466.1 LTYRFRGHSLADPDEMRSAEKEEFWH-ARDPIKRLADHLITYG-----LASEEELKAI  
WP\_054467567.1 LTYRFRGHSLADPDEMRSAEKEEFWH-ARDPIKRLADHLITYG-----LASEEELKAI  
NER36376.1 LTYRFRGHSLADPDEMRSAEKEEFWH-ARDPIKRFAPFLDRD-----LASEEELQID  
WP\_099532957.1 LTYRFRGHSLADPDELRKKEEKEVWG-KRDPKRLADHLLGEG-----LVKAEELKEID  
RFP60064.1 LTYRFRGHSLADPDELRKKEEKEVWS-KRDPKRLADHLLGEG-----LVKAEELKEID  
TAD79621.1 LTYRFRGHSLADPDELRKKEEKDVWS-KRDPKRLADHLLTGG-----LATAEELKEID  
NJI88881.1 LTYRFRGHSLADPDEMRKDEKEFWF-SRDPKRLADHLLTNN-----LADKQELQAI  
WP\_106308404.1 LTYRFRGHSLADPDELRPKKEKDFWF-ARDPIKRLANYLIAEG-----LATADELAALD  
WP\_015160492.1 LTYRFRGHSLADPDELRPKKEKDFWF-ARDPIKRLANYLIAEG-----LATADELAALD  
NES93940.1 LTYRFRGHSLADPDELSKKEEKEFWF-TRDPKRLAAYLIEQN-----LVEQQELKEID  
WP\_069965886.1 LTYRFRGHSLADPDELSKKEEKEFWF-TRDPKRLAAYLIEQN-----LVEQQELKEID  
WP\_162548243.1 LTYRFRGHSLADPDELSKKEEKEFWL-TRDPKRLAAYLIEHQ-----LANADELKDID  
MBC6475066.1 LTYRFRGHSLADPDELSKQEEKEFWL-TRDPKRNFAAYLAKKN-----LASAEELKAI  
MBC6421557.1 LTYRFRGHSLADPDELSKQEEKEFWL-TRDPKRNFAAYLAEKN-----LASAEELKAI  
MBC6454076.1 LTYRFRGHSLADPDELSKQEEKEFWL-TRDPKRNFAAYLAEKN-----LASAEELKAI  
MBC6481213.1 LTYRFRGHSLADPDELSKQEEKEFWL-TRDPKRNFAAYLAEKN-----LASAEELKAI  
WP\_014276531.1 LTYRFRGHSLADPDELRDKEEKEFWF-ARDPINKFFAYLTEHN-----LADSDELKAI  
WP\_062945893.1 LTYRFRGHSLAEPDELDRDKEEKEFWF-ARDPINKFFAYLTEHN-----LADSDELKAI  
TVU55722.1 LTYRFRGHSLADPDELRDREKEEKEFWF-ARDPINKFFAYLTEHN-----LADSDELKAI  
WP\_006623993.1 LTYRFRGHSLADPDELRDREKEEKEFWF-ARDPINKFFAYLTEHN-----LADSDELKAI  
OIP70337.1 LTYRFRGHSLADPDELRDKDEKDFWL-ARDPIKRFAAHLTEHN-----LATPEELKAI  
HAN73472.1 LTYRFRGHSLADPDELRDKDEKEFWL-ARDPIKRFAAHLTEHN-----LVTQEELKAI  
WP\_026786093.1 LTYRFRGHSLADPDELRDKDEKEFWF-ARDPIKRFAAHLTEHN-----LATHEELKAI  
WP\_141293541.1 LTYRFRGHSLADPDELRDKDEKEFWF-ARDPIKRFAAHLTEHN-----LATPEELKAI  
WP\_026794738.1 LTYRFRGHSLADPDELRDKDEKEFWF-ARDPIKRFAAHLTEHN-----LATHEELKAI  
WP\_042155681.1 LTYRFRGHSLADPDELRDKDEKEFWF-ARDPIKRFAAHLTEHN-----LATHEELKAI  
CUM59623.1 LTYRFRGHSLADPDELRDKDEKEFWF-ARDPIKRFAAHLTEHN-----LATHEELKAI  
WP\_079681339.1 LTYRFRGHSLADPDELRDKEEKEFWF-ARDPIKRFAAHLTEHN-----LATPEELKAI  
WP\_083616468.1 LTYRFRGHSLADPDELRDKEEKEFWF-ARDPIKRFAAHLTEHK-----LATPEELKAI  
WP\_083621801.1 LTYRFRGHSLADPDELRDKEEKEFWF-ARDPIKRFAAHLTEYN-----LATQEELKAI  
WP\_072717583.1 LTYRFRGHSLADPDELRDKEEKEFWF-ARDPIKRFAYLTEHN-----LATQEELKAI  
WP\_190520290.1 LTYRFRGHSLADPDELRDKDEKEFWF-ARDPIKRFAAHLTEYN-----LATQEELKAI  
WP\_023064139.1 LTYRFRGHSLADPDELRDQEEKEFWF-SRDPKRLANYLIEKD-----LASAEQLKEID  
WP\_009787238.1 LTYRFRGHSLADPDELRDQEEKDFWF-SRDPKRLANYLIEKN-----LASAEQLKEID  
NJK40050.1 LTYRFRGHSLADPDELRDKAEKEYWF-SRDPKRLASYLTEHQ-----LATPEELKAI  
WP\_073592994.1 LTYRFRGHSLADPDELSKKEEKEFWF-PRDPKRLGAYLTEHN-----LATEEELKAI  
WP\_193982633.1 LTYRFRGHSLADPDELSKKEEKEFWF-PRDPKRLGAYLTEHN-----LATEDELKAI  
WP\_190464989.1 LTYRFRGHSLADPDELSKKEEKEFWF-TRDPKRLAAYLTEKN-----LAFEDELKAI  
HAZ47566.1 LTYRFRGHSLADPDELSKKEEKEFWF-TRDPKRFAYLTEQN-----LATAEELKDID  
HAX78585.1 LTYRFRGHSLADPDELSKKEEKEFWF-TRDPKRFAYLTEQN-----LATAEELKDID  
OJJ26208.1 LTYRFRGHSLADPDELSKDEKEFWF-PRDPKRFAGYLTSKE-----LATEAQLKDID  
HBQ99207.1 LTYRFRGHSLADPDELSKDEKEFWF-PRDPKRFAGYLTLKE-----LATEAQLKDID

WP\_190665367.1 LTYRFRGHSLADPDELRKKEEFWF-PRDPIKRLAAYLTEQN-----LATQDELKAIE  
WP\_190759714.1 LTYRFRGHSLADPDELRKKEEFWF-PRDPIKRLAAYLTEQN-----LATQDELKAIE  
WP\_017717188.1 LTYRFRGHSLADPDELRKKEEKDFWF-TRDPIKRLAAYLTEQN-----LANSEELKAIE  
HIK27993.1 LTYRFRGHSLADPDELRKKEEFWF-TRDPIERFGKYLKEQN-----LATEEELKEIQ  
NEQ75960.1 LTYRFRGHSLADPDELRKKEEKEYWF-SRDPIEQFTAYLTEHN-----LADVAELKAID  
NES70880.1 LTYRFRGHSLADPDELRDKEEKEYWF-SRDPIEQFTAYLTEHN-----LADVAELKAID  
NEP80269.1 LTYRFRGHSLADPDELRDKEEKEYWF-SRDPIEQFTAYLTENN-----LADVAELKAID  
NET13763.1 LTYRFRGHSLADPDELRDKEEKEYWF-SRDPIEQFTVYLTENN-----LADVAELKAID  
NET46517.1 LTYRFRGHSLADPDELRDKEEKEYWF-SRDPIEQFTAYLTEHN-----LADVAELKAID  
NET24233.1 LTYRFRGHSLADPDELRDKEEKEYWF-SRDPIEQFTAYLTEHN-----LADVAELKAID  
NEN89149.1 LTYRFRGHSLADPDELRDKEEKEYWF-SRDPIEQFTAYLTEHN-----LADVAELKAID  
NEO55765.1 LTYRFRGHSLADPDELRDKEEKEYWF-SRDPIEKFTAYLTEHN-----LADAAELKAID  
GGA47254.1 LTYRFRGHSLADPDELRDKEEKEYWF-SRDPIEKFIAYLTENN-----LADVAELKAID  
NEP39550.1 LTYRFRGHSLADPDELRDKEEKEYWF-SRDPIKQFTAYLTENN-----LADVAELEAID  
WP\_124146642.1 LTYRFRGHSLADPDELRDKEEKEYWF-SRDPIKQFTAYLTENN-----LADVAELEAID  
NES75687.1 LTYRFRGHSLADPDELRDKEEKEYWF-SRDPIKQFTAYLTENN-----LADVAELEAID  
NEP88753.1 LTYRFRGHSLADPDELRDKEEKEYWF-SRDPIKQFTAYLTENN-----LADVAQLEAID  
WP\_011614263.1 LTYRFRGHSLADPDELRDKEEKQYWF-SRDPIKQFTTYLTENN-----LADVAELKAID  
NEQ37817.1 LTYRFRGHSLADPDELRDKEEKEYWF-SRDPIKQFTTYLTENN-----LVDVAELKAID  
NES05711.1 LTYRFRGHSLADPDELRDQEEKEYWF-SRDPIKQFTTYLKENN-----LVDVAELTAID  
WP\_143437784.1 LTYRFRGHSLADPDELRDQEEKEYWF-SRDPIKQFKTYLT-----  
WP\_106286768.1 MTYRFRGHSLADPDELRKAEKDTWF-VRDPIKLFAYLNEHN-----LADVDELKAID  
NER21238.1 LTYRFRGHSLADPDELRDPEEKEFWL-TRDPIQKLATYLTENN-----LANSEELQAIK  
NER50583.1 LTYRFRGHSLADPDELRDPEEKEFWL-TRDPIQKLATYLTENN-----LANSEELQAIK  
NEQ64953.1 LTYRFRGHSLADPDELRDPEEKEFWL-TRDPIQKLATYLTENN-----LADSEELQAIK  
NES18992.1 LTYRFRGHSLADPDELRDPEEKEFWL-TRDPIQKLAAYLTENN-----LADSEELQAIK  
NEP62314.1 LTYRFRGHSLADPDELRDQEEKEFWL-TRDPIQKLATYLTENN-----LADSEELQAIK  
NEP09987.1 LTYRFRGHSLADPDELRDQEEKEFWL-TRDPIQKLTAYLTEHN-----LADSEELQAIK  
NET60570.1 LTYRFRGHSLADPDELRDPEEKEFWL-TRDPIQKLAAYLTEHN-----LADSEELQAIK  
NEO20675.1 LTYRFRGHSLADPDELRDPEEKEFWL-TRDPIKQMASYLTENN-----LATAEELKAIE  
NET80444.1 LTYRFRGHSLADPDELRDPEEKEFWL-TRDPIKQMASYLTENN-----LATAEELKAIE  
NEO06662.1 LTYRFRGHSLADPDELRDPEEKEFWL-TRDPIKQMASYLTENN-----LATAEELKAIE  
NEO39016.1 LTYRFRGHSLADPDELRDPEEKEFWL-TRDPIKQMASYLTENN-----LATAEELKAIE  
NEO91862.1 LTYRFRGHSLADPDELRDPEEKEFWL-TRDPIKQMASYLTENN-----LATAEELKAIE  
WP\_008180311.1 LTYRFRGHSLADPDELRDPEEKEFWL-TRDPIKQMASYLTENN-----LATAEELKAIE  
NES45035.1 LTYRFRGHSLADPDELRDPEEKEFWL-TRDPIKQMASYLTENN-----LATAEELKAIE  
WP\_071104958.1 LTYRFRGHSLADPDELRDPEEKEFWL-TRDPIKQMASYLTENN-----LATAEELKAIE  
WP\_070393617.1 LTYRFRGHSLADPDELRDPEEKEFWL-TRDPIKQMASYLTENN-----LATAEELKAIE  
NEO70400.1 LTYRFRGHSLADPDELRDPEEKEFWL-TRDPIKQMASYLTENN-----LATAEELKAIE  
WP\_075900663.1 LTYRFRGHSLADPDELRDPEEKEFWL-TRDPIKQMASYLTENN-----LATAEELKAIE  
NEO50731.1 LTYRFRGHSLADPDELRDPEEKEFWL-TRDPIKQMASYLTENN-----LATAEELKAIE  
NEO75007.1 LTYRFRGHSLADPDELRDPEEKEFWL-TRDPIKQMASYLTENN-----LATAEELKAIE  
NEP47373.1 LTYRFRGHSLADPDELRDPEEKEFWL-TRDPIKQMASYLTENN-----LATAEELKAIE  
NEQ83845.1 LTYRFRGHSLADPDELRDPEEKEFWL-TRDPIKQMASYLTENN-----LATAEELKAIE  
NEO46719.1 LTYRFRGHSLADPDELRDPEEKEFWL-TRDPIKQMASYLTENN-----LATAEELKAIE  
NES83869.1 LTYRFRGHSLADPDELRDPEEKEFWL-TRDPIKQMASYLTENN-----LATAEELKAIE  
NEO01153.1 LTYRFRGHSLADPDELRDPEEKEFWL-TRDPIKQMASYLTENN-----LATAEELKAIE  
NEO03978.1 LTYRFRGHSLADPDELRDPEEKEFWL-TRDPIKQMASYLTENN-----LATAEELKAIE  
NEP28477.1 LTYRFRGHSLADPDELRDPEEKEFWL-TRDPIKQMASYLTENN-----LATAEELKAIE  
NEQ22243.1 LTYRFRGHSLADPDELRDPEEKEFWL-TRDPIKQMASYLTENN-----LATAEELKAIE  
WP\_192222464.1 LTYRFRGHSLADPDELRDPEEKEFWL-PRDPIKLAAYLTEQN-----LVQQEELKAIE  
WP\_190497871.1 LTYRFRGHSLADPDELRDPEEKEFWL-PRDPIKLAAYLTEQN-----LVQQEELKAIE  
WP\_190776259.1 LTYRFRGHSLADPDELRDPEEKEFWL-PRDPIKLAAYLTEQN-----LVQQEELKAIE  
WP\_015182305.1 LTYRFRGHSLADPDELRDPEEKEFWL-PRDPIKLAAYLTEQN-----LVQQEELKAIE  
HAA29147.1 LTYRFRGHSLADPDELRDPEEKEFWL-PRDPIKLAAYLTEQN-----LVQQEELKAIE  
MBD0343275.1 LTYRFRGHSLADPDELRDPEEKEFWL-PRDPIKLAAYLTEQN-----LVQQEELKAIE  
NER27055.1 LTYRFRGHSLADPDELRDPEEKEFWL-VRDPIEKLAAYLTEQK-----LASKEELKQIE  
NEO32341.1 LTYRFRGHSLADPDELRDPEEKEFWL-VRDPIEKLAAYLTEQK-----LASKEELKQIE  
NET06944.1 LTYRFRGHSLADPDELRDPEEKEFWL-VRDPIEKLAAYLTEQK-----LASKEELKQIE  
NEP01968.1 LTYRFRGHSLADPDELRDPEEKEFWL-VRDPIEKLAAYLTEQK-----LASKEELKQIE  
HAX84702.1 LTYRFRGHSLADPDELRDPEEKEFWL-PRDPIKLAAYLTEHN-----LAEAEELKAID  
HAG80992.1 LTYRFRGHSLADPDELRDPEEKEFWL-PRDPIKLAAYLTEHN-----LAEAEELKAID  
HBE59314.1 LTYRFRGHSLADPDELRDPEEKEFWL-PRDPIKLAAYLIEQN-----LADAEELKAID  
WP\_193878665.1 LTYRFRGHSLADPDELRDPEEKEFWL-TRDPIKLAAYLIEQN-----LADAEELKAID  
HBB35330.1 LTYRFRGHSLADPDELRDPEEKEFWL-TRDPIKLAAYLIEQN-----LADAEELKAID  
WP\_006102809.1 LTYRFRGHSLADPDELRDPEEKEFWL-TRDPIKLAAYLIEQN-----LADAEELKAID  
WP\_193935013.1 LTYRFRGHSLADPDELRDPEEKEFWL-TRDPIKLAAYLIEQN-----LADAEELKAID  
PIG90807.1 LTYRFRGHSLADPDELRDPEEKEFWL-TRDPIKLAAYLIEQN-----LADAEELKAID  
WP\_105219579.1 LTYRFRGHSLADPDELRDPEEKEFWL-TRDPIKLAAYLIEQN-----LADAEELKAID

WP\_015188060.1 LTYRFRGHSLADPDELSKDEKEFWF-ARDPIKLAAYLTEQN-----LASQAEELKQIE  
 WP\_073549434.1 LTYRFRGHSLADPDELSKDEKEFWF-ARDPIKLAAYLTEQN-----LASQAEELKQIE  
 WP\_104548453.1 LTYRFRGHSLADPDELSKDEKEFWF-ARDPIKLAAYLTEQN-----LASQAEELKQIE  
 WP\_009631809.1 LTYRFRGHSLADPDELRKKEEKDFWF-SRDPIKLAAYLTEHN-----LASESELKEIE  
 WP\_106367689.1 LTYRFRGHSLADPDELRKKEEKDFWF-SRDPIKLAAYLTENN-----LASESELKEIE  
 WP\_045056773.1 LTYRFRGHSLADPDELSKKEEKEFWF-SRDPIKLANYLTEHN-----LASESELKEIE  
 WP\_190422898.1 LTYRFRGHSLADPDELSKNEKEFWF-ARDPIKLAHLTEQN-----LATQEELKEID  
 WP\_190460214.1 LTYRFRGHSLADPDELSKNEKEFWF-ARDPIKLAHLTEQN-----LATQEELKEID  
 WP\_190438498.1 LTYRFRGHSLADPDELSKNEKEFWF-ARDPIKLAHLTEQN-----LATQEELKEID  
 WP\_190410195.1 LTYRFRGHSLADPDELSKNEKEYWF-ARDPIKLAHLVEHN-----LVDQEELKEID  
 WP\_190426886.1 LTYRFRGHSLADPDELSKNEKEYWF-ARDPIKLAHLVEHN-----LVDQEELKEID  
 WP\_190820055.1 LTYRFRGHSLADPDELSKNEKEYWF-ARDPIKLAHLVEHN-----LVDQEELKEID  
 WP\_190486662.1 LTYRFRGHSLADPDELSKTEKEYWF-ARDPIKRLAAYLTEHN-----LASQEELKDLE  
 WP\_015201162.1 LTYRFRGHSLADPDELSKAEKEMWL-ARDPIKLAAYMIEQN-----LATQEELKQIE  
 WP\_007355519.1 LTYRFRGHSLADPDELSKKEEKEYWF-PRDPIKLAADLTERN-----LATVEELKEIE  
 OCR01703.1 LTYRFRGHSLADPDELSKKEEKEFWF-PRDPIKLLGGYLIEN-----LATAEQLKEIE  
 TAD91762.1 LTYRFRGHSLADPDELSKKEEKEFWF-PRDPIKLAADLIDRA-----LATAEELKAIE  
 WP\_096830499.1 LTYRFRGHSLADPDELSKKEEKEFWF-PRDPIKRLAADLIDRT-----LATAEELKAIE  
 HBK96684.1 LTYRFRGHSLADPDELSKKEEKEFWF-PRDPIKLAADLIDRN-----LATAEELKAID  
 TAG88077.1 LTYRFRGHSLADPDELSKKEEKEYWF-PRDPIKLAADLIDRA-----LATAEELKAIE  
 WP\_194011920.1 LTYRFRGHSLADPDELSKKEEKEYWF-PRDPIKLAADLIDRT-----LATAEELKAID  
 WP\_194066346.1 LTYRFRGHSLADPDELSKKEEKEYWF-PRDPIKLAADLIDRT-----LATAEELKAID  
 TAF95178.1 LTYRFRGHSLADPDELSKKEEKEYWF-PRDPIKLAADLIDRT-----LATAEELKAID  
 TAE11220.1 LTYRFRGHSLADPDELSKKEEKEYWF-PRDPIKLAADLIDRT-----LATAEELKAIE  
 TAE79733.1 LTYRFRGHSLADPDELSKKEEKEYWF-PRDPIKLAADLIDRT-----LATAEELKAID  
 PSB16533.1 LTYRFRGHSLADPDELSKKEEKEYWF-PRDPIKLAADLIDRT-----LATAEELKAIE  
 WP\_194062349.1 LTYRFRGHSLADPDELSKKEEKEFWF-PRDPIKLAADLIDRT-----LATAEELKDIE  
 WP\_193974030.1 LTYRFRGHSLADPDELSKKEEKEYWF-PRDPIKLAADLIDRT-----LATAEELKDIE  
 WP\_190745560.1 LTYRFRGHSLADPDELSKKEEKEYWF-PRDPIKLAADLIDRT-----LATAEELKAIE  
 WP\_172192744.1 LTYRFRGHSLADPDELSKKEEKEYWF-PRDPIKLAADLIDRT-----LATAEELKEIE  
 MBD0311597.1 LTYRFRGHSLADPDELSKKEEKEYWF-PRDPIKLAADLIDRT-----LATAEELKEID  
 MBD0394082.1 LTYRFRGHSLADPDELSKKEEKEYWF-PRDPIKLAGDLIDRT-----LATAEELKEID  
 WP\_006634162.1 LTYRFRGHSLADPDELSKKEEKEYWF-PRDPIKLAADLIDRT-----LATAEELKEID  
 CAA9426638.1 LTYRFRGHSLADPDELSKKEEKEYWF-PRDPIKLAADLIDRT-----LATAEELKEIE  
 MBD0310074.1 LTYRFRGHSLADPDELSKKEEKEYWF-PRDPIKLAGELIDRT-----LATAEELKEID  
 WP\_015178608.1 LTYRFRGHSLADPDELSKKEEKEYWF-PRDPIKLAELIDRT-----LATAEELKEID  
 WP\_190658178.1 LTYRFRGHSLADPDELSKKEEKEFWF-PRDPIKLAADLIDRT-----LATAEELKEID  
 NJK65991.1 LTYRFRGHSLADPDELSKKEEKEYWF-PRDPIKLLATDLIDRN-----LATAEELKEID  
 NJR25937.1 LTYRFRGHSLADPDELSKKEEKEYWF-PRDPIKLAFLIDRT-----LASAEELKAIE  
 WP\_015147267.1 MTYRFRGHSLADPDELSKKEEKEFWL-SRDPIKQLSAYLTEKN-----LATAEELKEIE  
 WP\_168570583.1 LTYRFRGHSLADPDELSKKEEKDFWH-ARDPIARLGAHLLEHN-----LVRQEELDEIE  
 MBC6953407.1 KTYRYMGHSMSPDQKYRTKEEVDEWK-ERDSIAALASHLMRSKDDGGRACLTEDEWKEMQ  
 WP\_063714489.1 LTYRYQGHSMSPDQKYRTKEEVDEYK-GKDSIAALLDHLMD-----RGAIDEDAWKTMR  
 KAA0213077.1 KTYRYYGHSMSPDQKYRSKDEVDQWK-SKDP IAAMAAYLMGE-----RGCLSEEQWQAME  
 \*\*\*: .\*: . \*

## PdhA

slr1934 pyruvate dehydrogenase E1 component, alpha subunit

MVSRILPELNTAEISLDRETALVLYEDMVLGRFFEDKCAEMYYRGKMFVHLYNGQEAVSSGIIKAMRQDEYV  
 CSTYRDHVHALSAGVPAREVMAELFGKETGCSRGRGSMHLFSSAHNLLGGFAFIGEGIPVALGAAFQTKYRREVL  
KDDGYDQVTACFFGDGTSNNGQFFECLNMAALWKLPIILVVENNKWAIGMAHERATSQPEIYKASVFNMVG  
 EVDGMDVVAMHKVATEAVARARAGEGPTLIEALTYRFRGHSLADPDELSAEKQFWAARDPIKKFAAFMTEHEL  
 ASNEELKAIDKRIQEVDDALFAESSPEPNPEDLRKIYFAD

Figure S7: Amino sequence of the PdhA subunit of the PDH complex. The peptide that was used to raise an antibody is underlined. The conserved serine residue is shown in red and underlined as well.

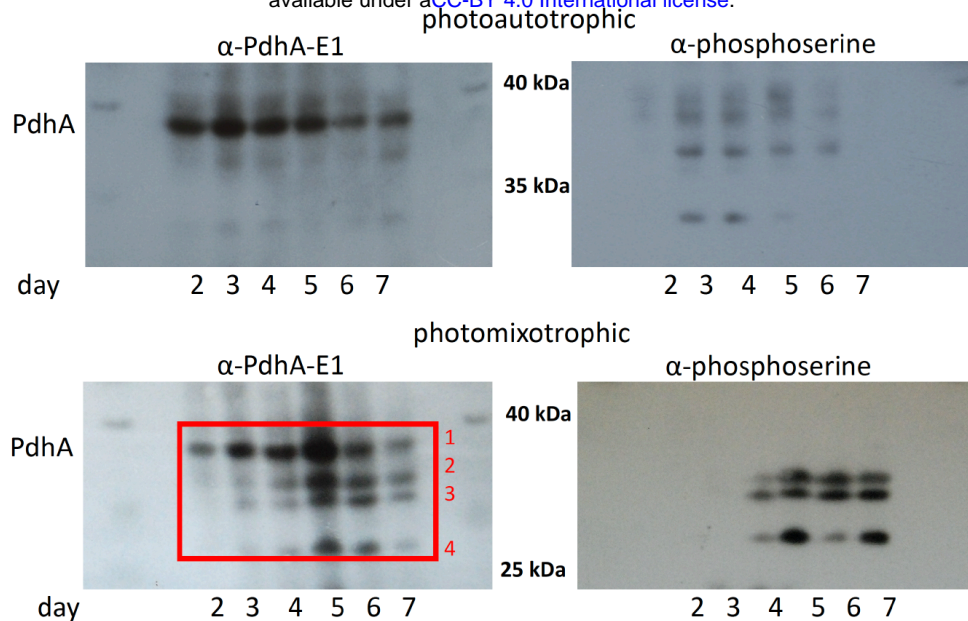

Figure S8: Immunoblots on protein extracts from days 2 to 4 of the wild type grown under photoautotrophic and photomixotrophic conditions. An antibody against the E1 subunit of PdhA of the PDH complex ( $\alpha$ -PdhA-E1) as well as an antibody that specifically detects phosphorylated serine residues ( $\alpha$ -phosphoserine) were utilized. Representative blots from more than three replicates are shown.

Phosphorylated proteins can be detected by immunoblots due to their modified electrophoretic mobility in contrast to unphosphorylated proteins. Therefore, immunoblots were carried out in order to check if the PDH complex of *Synechocystis* gets phosphorylated under photomixotrophic conditions. Protein extracts were obtained from cells taken from growth experiments on days 2 to 7 as the NADH/NAD<sup>+</sup> was especially high and as  $\Delta$ *pdfor* displayed its characteristic growth impairment in these days (see Fig. 1A and 1B). An antibody against the E1 subunit of PdhA ( $\alpha$ -PdhA-E1) (Fig. S7) and an antibody that binds specifically to phosphorylated serine residues ( $\alpha$ -phosphoserine) were used. As we were not able to delete *pdhA* of the PDH complex in *Synechocystis*, we unfortunately could not use a negative control for our immunoblot analyses. However, the expected molecular mass of the E1 subunit of the PDH complex is 38 kDa, and a corresponding strong signal of this size was detected under photoautotrophic and photomixotrophic conditions in the WT by  $\alpha$ -PdhA-E1 (Fig. S8).

In line with our hypothesis additional bands appeared on the blots from photomixotrophically grown cells on days 3 to 7 in the range between 26 to 36 kDa. The phosphorylation of a protein results in an additional negative charge which can result in a higher mobility in the SDS gel. All four bands were excised from the gel and analyzed via mass spectrometry. Many peptides which belong to PdhA were detected by MS/MS in the band 1 (red box in Fig. S8) confirming the reliability of the  $\alpha$ -PdhA-E1 antibody (Table S3). The MS/MS analyses of the bands 2-4 were aimed to discover the phosphopeptide GHpSLADPDELRL in the TiO<sub>2</sub>-enriched peptide fractions. Unfortunately, in contrast to the unmodified peptide, its phosphorylated form remained undetected. These forms were either below detection limits or not present. We subsequently subjected immunoblots as well to a specific antibody against phosphorylated serines ( $\alpha$ -phosphoserine). As expected, the phosphoserine antibody did not give a signal for band 1, (which we assumed as being the unphosphorylated form of PdhA) but precisely detected those bands 2-4 that appeared in addition on the blot from photomixotrophically grown cells (which we assumed as being the phosphorylated form of PdhA). Based on these results we cannot unambiguously establish if PdhA of the PDH complex in *Synechocystis* gets phosphorylated. It might as well be that the protein indeed gets phosphorylated and degraded thereupon, which would explain the additional bands that appear under photomixotrophic conditions. In this case the phosphorylation might have been lost in the degraded enzymes. The immunoblots thus give some convincing hints for



bioRxiv preprint doi: <https://doi.org/10.1101/2021.08.27.457892>; this version posted August 28, 2021. The copyright holder for this preprint (which was not certified by peer review) is the author/funder, who has granted bioRxiv a license to display the preprint in perpetuity. It is made available under aCC-BY 4.0 International license.

either a phosphorylation and/or degradation of the PdnA protein in those days in which the NADH/NAD<sup>+</sup> ratios are high and PFOR gets important for optimal photomixotrophic growth.

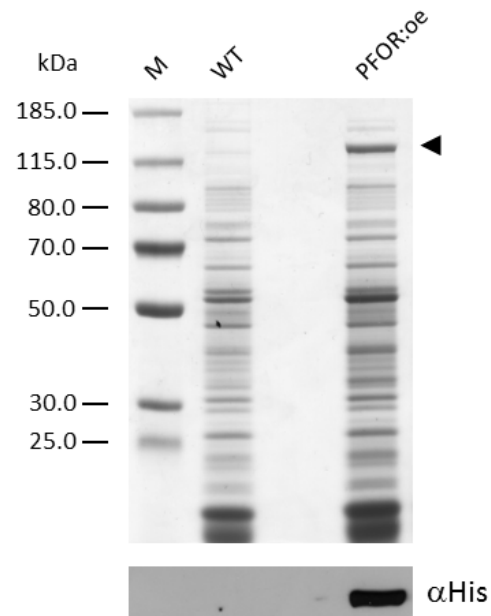

Figure S9: SDS PAGE analysis followed by immunoblotting of *Synechocystis* soluble extracts. Soluble extracts for the wild type (WT) and the mutant overexpressing PFOR (PFOR:oe) containing 15  $\mu$ g of protein were loaded per lane. The arrowhead indicates the position of over-expressed PFOR.

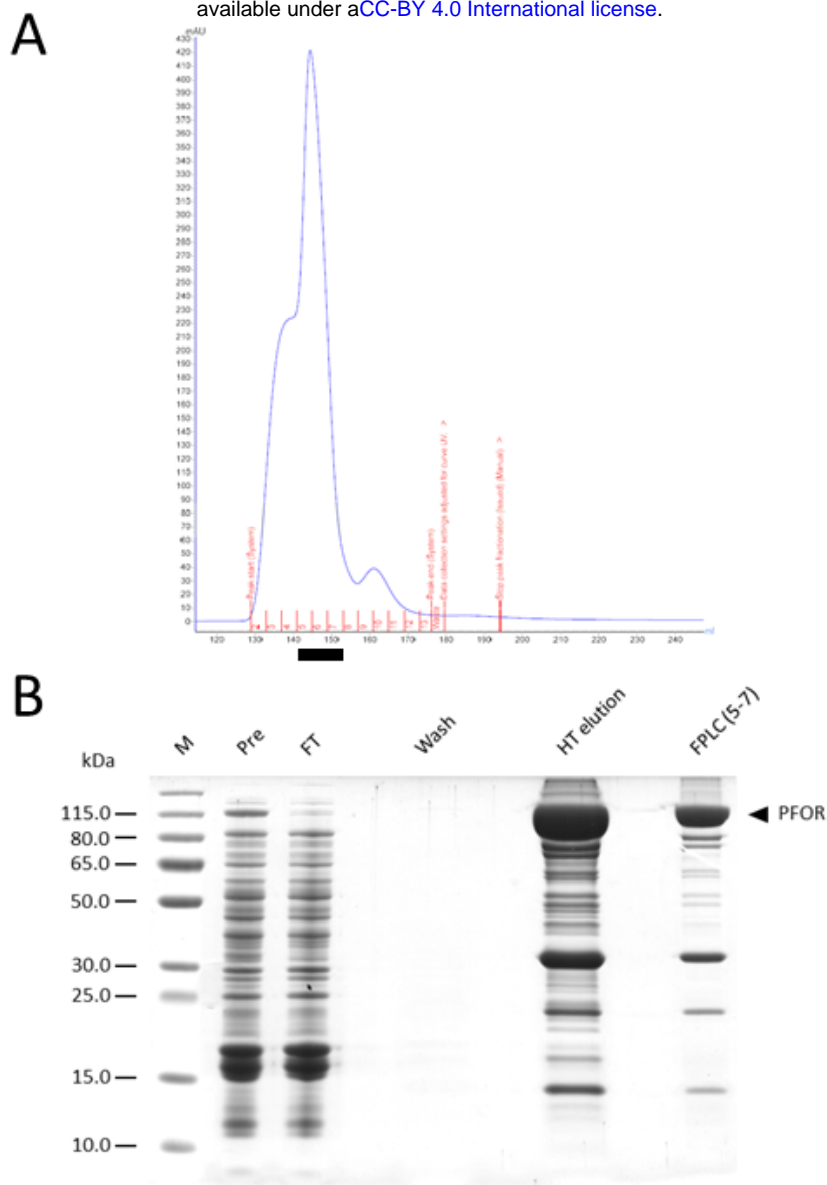

Figure S10: Large-scale PFOR purification. (A) The chromatogram of the FPLC size exclusion run. The collected fractions (5 to 7) are marked by the black bar underneath. (B) Various fractions from the purification procedure were analyzed by SDS PAGE. Soluble extracts before (Pre) and after (Post) the incubation with Talon Cobalt resin, a wash fraction, the His-tag elution and the pooled FPLC fraction (5 to 7) were loaded on the gel.

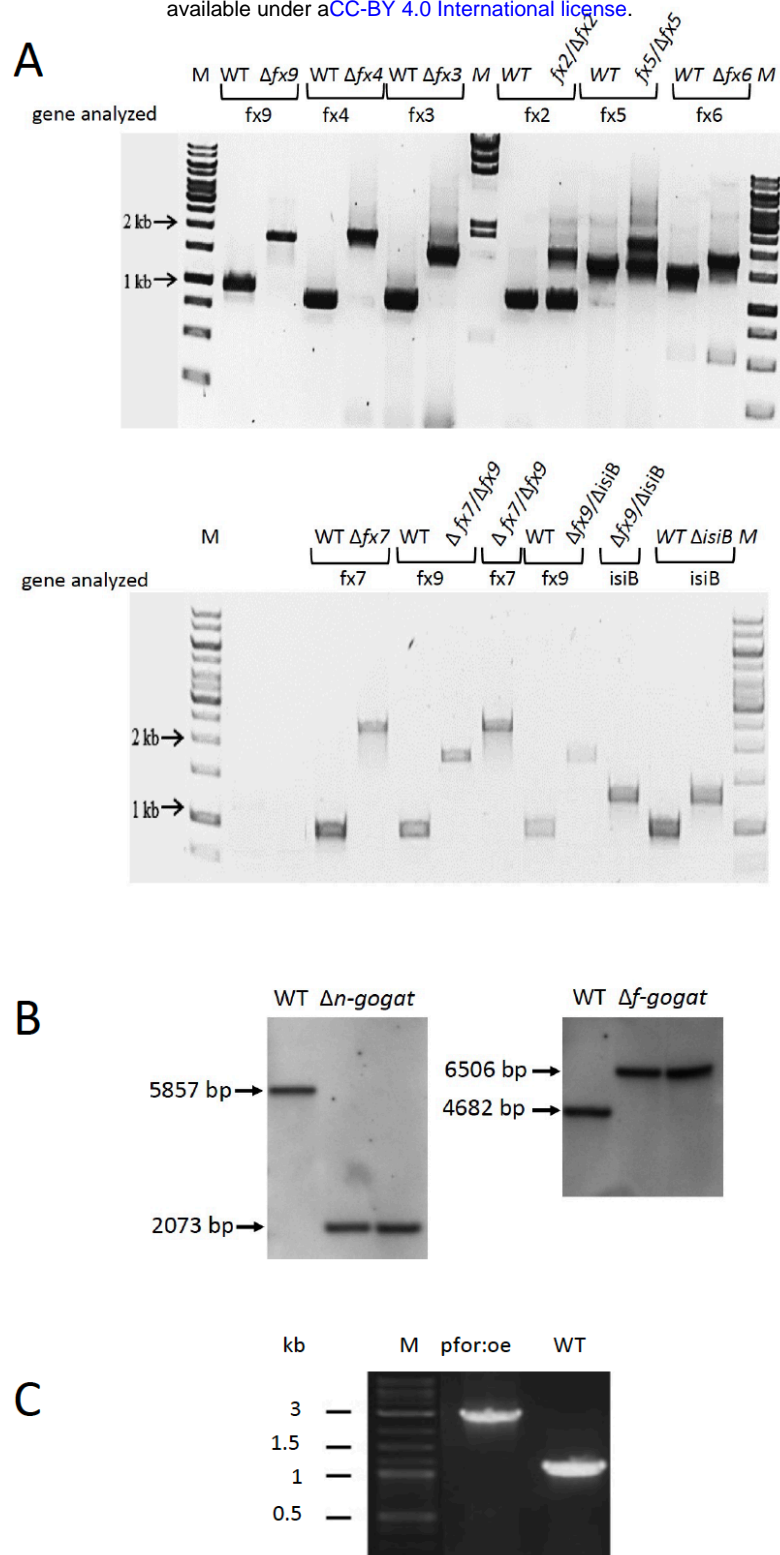

Figure S11: Examination of segregation of mutant strains. (A) PCR analysis of WT, ferredoxin (fx) and flavodoxin (isiB) mutants as indicated. (B) Southern blot of WT and  $\Delta n-gogat$  and  $\Delta f-gogat$  deletion mutants. WT DNA and DNA of two different mutant clones were applied after HindIII digestion. The sizes of the bands are indicated and correspond to those expected due to the mutation. (C) PCR analysis of PFOR overexpression (pfor:oe) mutant and WT.

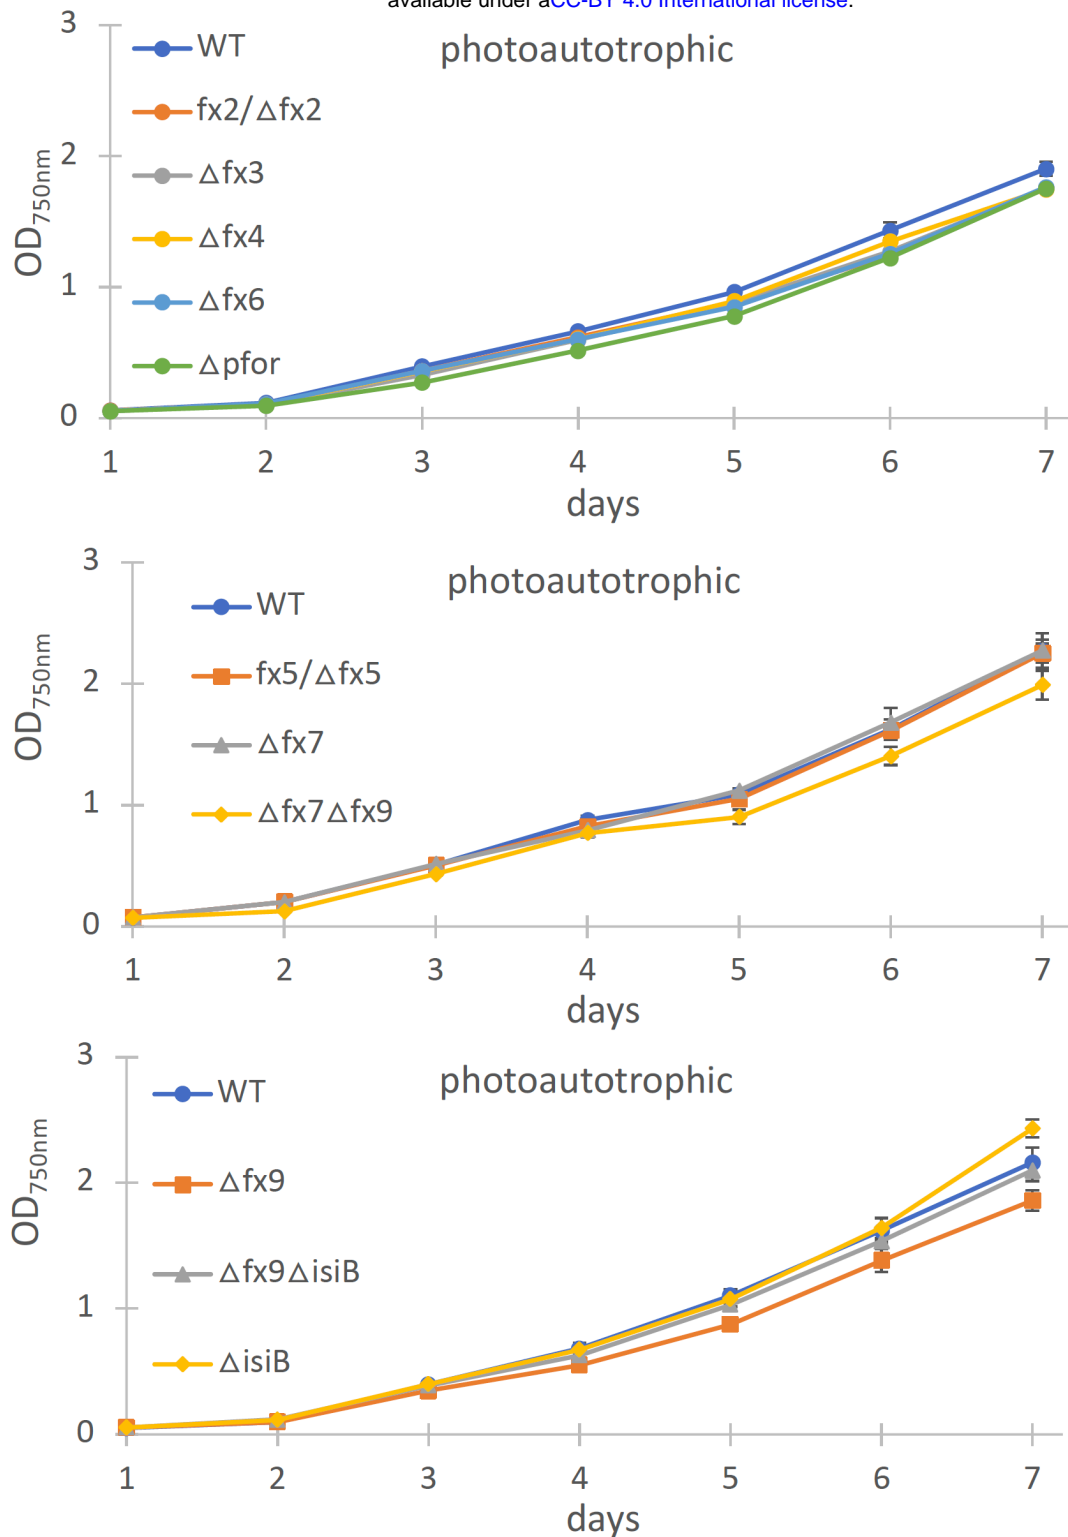

Figure S12: Photoautotrophic growth of different ferredoxin (fx) and the flavodoxin (isiB) deletion mutant as indicated in comparison to the wild type (WT). Shown are mean values  $\pm$  SD from at least 3 replicates.

Table S1: List of primers used in this study to generate deletion strains and for RT-PCR.

| Primer name | Sequence                                            | Fragment amplified            | Construct                                     |
|-------------|-----------------------------------------------------|-------------------------------|-----------------------------------------------|
| pfor-1      | TGGGCTATCTCTTTCCCCGG                                | upstream recombination-site   | Deletion of <i>pfor</i><br>( <i>slI0741</i> ) |
| pforin1     | ATCTAATTTCTTTTTTCGTCGACAAGGGGTGATGGGATAAATGG        |                               |                                               |
| Em1         | GTCGACGAAAAAAGAAATTAGATAAA                          | Em-cassette                   |                                               |
| Em2         | GTCGACTTACTTATTAATAATTTATAGC                        |                               |                                               |
| pforin2     | AATTATTTAATAAGTAAGTCGACGGTCTATTCGGAAAATCGCTTT       | downstream recombination-site |                                               |
| pfor-2      | ATTTTTGGTATTCATCTGAGTG                              |                               |                                               |
| Fdx1.1      | CCGGTCCTTAAACTCCCTT                                 | upstream recombination site   | Deletion of <i>fx1</i><br>( <i>ssl0020</i> )  |
| Fdx1in1     | TTGGCACCCAGCCTGCGCGAACAGTAGAGAGATTGCCTCAT           |                               |                                               |
| Sp-KG       | TCGCGCAGGCTGGGTGCCAA                                | Sp-cassette                   |                                               |
| Sp-rev      | GCCCTCGCTAGATTTTAATGCGGAT                           |                               |                                               |
| Fdx1in2     | ATCCGCATTAAAATCTAGCGAGGGCGGTAATAATGCTGGCCATGG       | downstream recombination site |                                               |
| Fdx1.2      | TTAATCTACCTTCGTTTCCC                                |                               |                                               |
| Fdx2.1      | CTCTCATATTCGACCTACC                                 | upstream recombination site   | Deletion of <i>fx2</i><br>( <i>slI1382</i> )  |
| Fdx2in1     | ATCAGAGATTTTGAGACACAACGTGGTTATGGGCTGGTTGAATCCA      |                               |                                               |
| Km1         | CCACGTTGTGTCTCAAATCTCTGAT                           | Km-cassette                   |                                               |
| Km2         | ATCGCCCCATCATCCAGCCAGAAAG                           |                               |                                               |
| Fdx2in2     | CTTTCTGGCTGGATGATGGGGCGATGTAGGCTACAACCTG            | downstream recombination site |                                               |
| Fdx2.2      | TCTGGGCAACGGCGTTTAAT                                |                               |                                               |
| Fdx3.1      | CGTCTGCCGACTGTTAGAT                                 | upstream recombination site   | Deletion of <i>fx3</i><br>( <i>slr1828</i> )  |
| Fdx3in1     | AGAGATTTATCTAATTTCTTTTTTCGTCGACCCATGGCAAAGCGGTAATAA |                               |                                               |
| Em1         | GTCGACGAAAAAAGAAATTAGATAAA                          | Em-cassette                   |                                               |
| Em2         | GTCGACTTACTTATTAATAATTTATAGC                        |                               |                                               |
| Fdx3in2     | GCTATAAATTATTTAATAAGTAAGTCGACTTCGGCTGGAATTCTCCCTT   | downstream recombination site |                                               |
| Fdx3.2      | GCAAAGACTCAAAGGACTGG                                |                               |                                               |
| Fdx4.1      | CAATTACAGCCATCCTGTTTG                               | upstream recombination site   | Deletion of <i>fx4</i><br>( <i>slr0150</i> )  |
| Fdx4in1     | TCAATAATATCGAATTCCTGCAGGAATGACCCAAACAATGGACT        |                               |                                               |
| Cm1         | CTGCAGGAATTCGATATTATTG                              | Cm-cassette                   |                                               |
| Cm2         | AAGCTTGATGGCGGCACCTCGCT                             |                               |                                               |

|         |                                                  |                               |                                              |
|---------|--------------------------------------------------|-------------------------------|----------------------------------------------|
| Fdx4in2 | AGCGAGGTGCCGCCATCAAGCTTAATGTTAGTCCAGCGGAGTT      | downstream recombination site |                                              |
| Fdx4.2  | TTAGCAGGCAAGACCACACT                             |                               |                                              |
| Fdx5.1  | CGATTCAGAACTCGGCATTG                             | upstream recombination site   | Deletion of <i>fx5</i><br>( <i>slr0148</i> ) |
| Fdx5in1 | ATCAGAGATTTTGGAGACACAACGTGGCATAATGGTGGCATGGTCATG |                               |                                              |
| Km1     | CCACGTTGTGTCTCAAATCTCTGAT                        | Km-cassette                   |                                              |
| Km2     | ATCGCCCCATCATCCAGCCAGAAAAG                       |                               |                                              |
| Fdx5in2 | CTTTCTGGCTGGATGATGGGGCGATCGTTGACTCGTCTCACCATTG   | downstream recombination site |                                              |
| Fdx5.2  | TCAGTGCTGGTAACACCATTG                            |                               |                                              |
| Fdx6.1  | TTCTCCACGCAGTTGGTGAC                             | upstream recombination site   | Deletion of <i>fx6</i><br>( <i>ss12559</i> ) |
| Fdx6in1 | GGTTCGTGCCTTCATCCGTCGACACCAGCATGGTATGGCGATC      |                               |                                              |
| Gm1     | GTCGACGGATGAAGGCACGAACC                          | Gm-cassette                   |                                              |
| Gm2     | GTCGACCGAATTGTTAGGTGGCG                          |                               |                                              |
| Fdx6in2 | CGCCACCTAACAATTCCGGTCGACTTGCCGATGGAACCTAAGC      | downstream recombination site |                                              |
| Fdx6.2  | AAGCTCTGGACGCCATTACC                             |                               |                                              |
| Fdx7.1  | CCGACTTAATGAATCGGCC                              | upstream recombination site   | Deletion of <i>fx7</i><br>( <i>SII0662</i> ) |
| Fdx7in1 | TTGGCACCCAGCCTGCGCGACAGGCACTCCAGCGTTGCAC         |                               |                                              |
| Sp-KG   | TCGCGCAGGCTGGGTGCCAA                             | Sp-cassette                   |                                              |
| Sp-rev  | GCCCTCGCTAGATTTTAATGCGGAT                        |                               |                                              |
| Fdx7in2 | ATCCGCATTAAAATCTAGCGAGGGCTTAATTGGGTGATGGAATCT    | downstream recombination site |                                              |
| Fdx7.2  | CTGAGTAGATTAATGTGGAC                             |                               |                                              |
| Fdx8.1  | CGTTGGCTAGCATGTCACTG                             | upstream recombination site   | Deletion of <i>fx8</i><br>( <i>ssr3184</i> ) |
| Fdx8in1 | TCAATAATATCGAATTCCTGCAGTAAGGGTAGCGGACGTTCAA      |                               |                                              |
| Cm1     | CTGCAGGAATTCGATATTATTG                           | Cm-cassette                   |                                              |
| Cm2     | AAGCTTGATGGCGGCACCTCGCT                          |                               |                                              |
| Fdx8in2 | AGCGAGGTGCCGCCATCAAGCTTGGTTGGGAGGGGTCTAACTG      | downstream recombination site |                                              |
| Fdx8.2  | CTCTGCCACTGTTAGGCTGC                             |                               |                                              |
| Fdx9.1  | CGGAGGGGGAAACGGAAGAA                             | upstream recombination site   | Deletion of <i>fx9</i><br>( <i>slr2059</i> ) |
| Fdx9in1 | ATCAGAGATTTTGGAGACACAACGTGGGGCATTTCACCCGCACTACG  |                               |                                              |
| Km1     | CCACGTTGTGTCTCAAATCTCTGAT                        | Km-cassette                   |                                              |
| Km2     | ATCGCCCCATCATCCAGCCAGAAAAG                       |                               |                                              |
| Fdx9in2 | CTTTCTGGCTGGATGATGGGGCGATCATCTTGCCGACTCCGCCA     |                               |                                              |

|            |                                                 |                               |                                                           |
|------------|-------------------------------------------------|-------------------------------|-----------------------------------------------------------|
| Fdx9.2     | AATTCCAAAATAAATACCCC                            | downstream                    |                                                           |
| isiB1      | ATGGATCATCCTCACACTTG                            | upstream recombination site   | Deletion of flavodoxin ( <i>isiB</i> , <i>sII0284</i> )   |
| isiBin1    | GGTTCGTGCCTTCATCCGTCGACGATTACTGGAAAGTTACTAAGC   |                               |                                                           |
| Gm1        | GTCGACGGATGAAGGCACGAACC                         | Gm-cassette                   |                                                           |
| Gm2        | GTCGACCGAATTGTTAGGTGGCG                         |                               |                                                           |
| isiBin2    | CGCCACCTAACAATTCGGTCGACGCAATCCTAGGTAACCTAAG     | downstream recombination site |                                                           |
| isiB2      | CTGGTTTGTTCATGGTAGGAG                           |                               |                                                           |
| pdhA1      | CAGGCGATCGCGTAACCGTTG                           | upstream recombination site   | Deletion of <i>pdhA</i> ( <i>sII1934</i> )                |
| pdhAin1    | TTGGCACCCAGCCTGCGCGATCTATGCGAAGTCGGTCAGC        |                               |                                                           |
| Sp-KG      | TCGCGCAGGCTGGGTGCCAA                            | Sp-cassette                   |                                                           |
| Sp-rev     | GCCCTCGCTAGATTTTAATGCGGAT                       |                               |                                                           |
| pdhAin2    | ATCCGCATTAATACTAGCGAGGGCACGTTACCGTTTGGGAGAA     | downstream recombination site |                                                           |
| pdhA2      | GACACCAACCGCTAATGGA                             |                               |                                                           |
| NGOGATout1 | CTATAGGGCGAATTGGGTACCCAAGTGAATTGCTTGGTGTGT      | upstream recombination site   | Deletion of NADH-dependent GOGAT ( <i>sII1502</i> )       |
| NGOGATin1  | GGTTCGTGCCTTCATCCGTCGACGACCTTCGTGGCAGGGCAT      |                               |                                                           |
| Gm1        | GTCGACGGATGAAGGCACGAACC                         | Gm-cassette                   |                                                           |
| Gm2        | GTCGACGAATTGTTAGGTGGCG                          |                               |                                                           |
| NGOGATin2  | CGCCACCTAACAATTCGGTCGACGCGGCGTTGAGGAGAAT        | downstream recombination site |                                                           |
| NGOGATout2 | AGGGAACAAAAGCTGGAGCT ATAGGTTGCAAACCTCATTAGCTA   |                               |                                                           |
| FGOGATout1 | CTATAGGGCGAATTGGGTAC ACCATCAGGCTGGGCAATTTGT     | upstream recombination site   | Deletion of ferredoxin-dependent GOGAT ( <i>sII1499</i> ) |
| FGOGATin1  | TTGGCACCCAGCCTGCGCGA GTGGCAACAGAGGAGTTTGCATA    |                               |                                                           |
| Sp-KG      | TCGCGCAGGCTGGGTGCCAA                            | Sp-cassette                   |                                                           |
| Sp-rev     | GCCCTCGCTAGATTTTAATGCGGAT                       |                               |                                                           |
| FGOGATin2  | ATCCGCATTAATACTAGCGAGGGC AGAAGACACTGACCTCTGTCTA | downstream recombination site |                                                           |
| FGOGATout2 | AGGGAACAAAAGCTGGAGCT ACCGCAGGGACATTATGGGCTTA    |                               |                                                           |
| pfor-tag1  | AGACCGTGTGCGAGCCAGCAAAGGGCCGATAGA               | primer for RT-reaction        | RT-PCR                                                    |
| pfor-tag2  | AGACCGTGTGCGAGCCAGCAA                           | primers for PCR               |                                                           |
| pfor-r     | AACAATTTGGCCAGCTAACCGG                          |                               |                                                           |
| pdhA-tag1  | AGACCGTGTGCGACACGGGAATCCCTTCCCCAT               | primer for RT-reaction        |                                                           |
| pdhA-tag2  | AGACCGTGTGCGACACGGGAAT                          | primers for PCR               |                                                           |
| pdhA-rev   | TTACGTTTGCAGTACCTATCGA                          |                               |                                                           |

|           |                                                   |                               |                                                       |
|-----------|---------------------------------------------------|-------------------------------|-------------------------------------------------------|
| rnpB-tag1 | AGACCGTGTGCGACACCAATCATGGGGCAGGAA                 | primer for RT-reaction        |                                                       |
| rnpB-tag2 | AGACCGTGTGCGACACCAATCA                            | primers for PCR               |                                                       |
| ndhD1out1 | CTATAGGGCGAATTGGGTACGACTATCTGGGTAGTATGAACACTT     | upstream recombination site   | pD1<br>Deletion of <i>ndhD1</i><br>( <i>slr0331</i> ) |
| ndhD1in1  | ATCAGAGATTTTGAGACACAACGTGGGGTGGTGATAAAACCGGTGAGAA |                               |                                                       |
| Km1       | CCACGTTGTGTCTCAAAATCTCTGAT                        | Km-cassette                   |                                                       |
| Km2       | ATCGCCCCATCATCCAGCCAGAAAG                         |                               |                                                       |
| ndhD1in2  | CTTTCTGGCTGGATGATGGGGCGATGACCCCCATTTATCTACTCTCCAT | downstream recombination site |                                                       |
| ndhD1out2 | AGGGAACAAAAGCTGGAGCTTTCTTGGTCGACTTAAAAACCAAT      |                               |                                                       |
| ndhD2out1 | CTATAGGGCGAATTGGGTACCAGGCGGCATAGTCTTCGAAAA        | upstream recombination site   | pD2<br>Deletion of <i>ndhD2</i><br>( <i>slr1291</i> ) |
| ndhD2in1  | TCAATAATATCGAATTCCTGCAGAGTGTTCCAACATGGTAATAAGAA   |                               |                                                       |
| Cm1       | CTGCAGGAATTCGATATTATTG                            | Cm-cassette                   |                                                       |
| Cm2       | AAGCTTGATGGCGGCACCTCGCT                           |                               |                                                       |
| ndhD2in2  | AGCGAGGTGCCGCCATCAAGCTTTCAAAGTTCAACCCTAGTGATCTA   | downstream recombination site |                                                       |
| ndhD2out2 | AGGGAACAAAAGCTGGAGCTAACCGATGCCACACCGGTCTGATT      |                               |                                                       |



Table S2: Liste of *Synechocystis* strains and mutants used in this study

| Strain                                 | Marker of genotype                                                               | <i>Synechocystis</i> WT background | Reference                                                                                                  |
|----------------------------------------|----------------------------------------------------------------------------------|------------------------------------|------------------------------------------------------------------------------------------------------------|
| WT                                     |                                                                                  | non-motile GT strain               | Trautmann et al. 2012                                                                                      |
| WTm                                    |                                                                                  | motile PCC-M strain                | Trautmann et al. 2012                                                                                      |
| $\Delta$ spkC                          | slI0599::km <sup>R</sup>                                                         | motile PCC-M strain                | This study                                                                                                 |
| $\Delta$ spkF                          | slr1225::km <sup>R</sup>                                                         | motile PCC-M strain                | This study                                                                                                 |
| $\Delta$ spkI                          | slI1770::km <sup>R</sup>                                                         | motile PCC-M strain                | This study                                                                                                 |
| $\Delta$ spkK                          | slr1919::km <sup>R</sup>                                                         | motile PCC-M strain                | This study                                                                                                 |
| $\Delta$ spkL                          | slI0095::km <sup>R</sup>                                                         | motile PCC-M strain                | This study                                                                                                 |
| $\Delta$ spkB                          | slr1697::km <sup>R</sup>                                                         | non-motile GT strain               | France/ Bedu, Marseille, Rippka et al 1979                                                                 |
| $\Delta$ spkD                          | slI0776::gm <sup>R</sup>                                                         | non-motile GT strain               | France/ Bedu, Marseille, Rippka et al 1979                                                                 |
| $\Delta$ spkE                          | slr1443::km <sup>R</sup>                                                         | non-motile GT strain               | France/ Bedu, Marseille, Rippka et al 1979                                                                 |
| $\Delta$ spkG                          | slr0152::spec <sup>R</sup> ::strep <sup>R</sup>                                  | non-motile GT strain               | France/ Bedu, Marseille, Rippka et al 1979                                                                 |
| fx2/ $\Delta$ fx2                      | slI1382::km <sup>R</sup>                                                         | non-motile GT strain               | Gutekunst et al. 2014                                                                                      |
| $\Delta$ fx3*                          | slr1828::em <sup>R</sup>                                                         | non-motile GT strain               | Gutekunst et al. 2014                                                                                      |
| $\Delta$ fx4*                          | slr0150::cm <sup>R</sup>                                                         | non-motile GT strain               | Gutekunst et al. 2014<br>*please note that the names of fx3 and fx4 are exchanged in Gutekunst et al. 2014 |
| fx5 $\Delta$ fx5                       | slr0148::km <sup>R</sup>                                                         | non-motile GT strain               | This study                                                                                                 |
| $\Delta$ fx6                           | ssl2559::gm <sup>R</sup>                                                         | non-motile GT strain               | This study                                                                                                 |
| $\Delta$ fx7                           | slI0662::spec <sup>R</sup>                                                       | non-motile GT strain               | This study                                                                                                 |
| $\Delta$ fx9                           | slr2059::km <sup>R</sup>                                                         | non-motile GT strain               | This study                                                                                                 |
| $\Delta$ isiB                          | slI0284::gm <sup>R</sup>                                                         | non-motile GT strain               | Gutekunst et al. 2014                                                                                      |
| $\Delta$ fx7 $\Delta$ fx9              | slI0662::spec <sup>R</sup> , slr2059::km <sup>R</sup>                            | non-motile GT strain               | This study                                                                                                 |
| $\Delta$ fx7 $\Delta$ fx8 $\Delta$ fx9 | slI0662::spec <sup>R</sup> , sss3184::cm <sup>R</sup> , slr2059::km <sup>R</sup> | non-motile GT strain               | This study                                                                                                 |
| $\Delta$ fx9 $\Delta$ isiB             | slr2059::km <sup>R</sup> , slI0284::gm <sup>R</sup>                              | non-motile GT strain               | This study                                                                                                 |
| $\Delta$ n-gogat                       | slI1502::gm <sup>R</sup>                                                         | non-motile GT strain               | This study                                                                                                 |

|                               |                                                           |                      |                     |
|-------------------------------|-----------------------------------------------------------|----------------------|---------------------|
| $\Delta$ f-gogat              | <i>sll1499::spec<sup>R</sup></i>                          | non-motile GT strain | This study          |
| $\Delta$ ndhD1 $\Delta$ ndhD2 | <i>slr0331::km<sup>R</sup>, slr1291::cm<sup>R</sup></i>   | non-motile GT strain | This study          |
| $\Delta$ hk                   | <i>sll0593::spec<sup>R</sup></i>                          | non-motile GT strain | Theune et al. 2021  |
| $\Delta$ glgP1 $\Delta$ glgP2 | <i>sll1356::km<sup>R</sup>, slr1367::spec<sup>R</sup></i> | non-motile GT strain | Makowka et al. 2020 |

Table S3: Peptides of the alpha subunit of the pyruvate dehydrogenase (Slr1934) E1 component detected via MS/MS in band No. 1 (red box) of Fig. S8

| Master     | Accession                                          | Description                                 | Coverage [%]     | # Peptides | # PSMs | # Unique Peptides         | # AAs                        | MW [kDa]                         | calc. pI           | Score Mascot: Mascot | # Peptides (by Search Engine): Mascot | Found in Sample: [S2] F2: Sample      | # Protein Groups                      |
|------------|----------------------------------------------------|---------------------------------------------|------------------|------------|--------|---------------------------|------------------------------|----------------------------------|--------------------|----------------------|---------------------------------------|---------------------------------------|---------------------------------------|
| Confidence | Annotated Sequence                                 | Modifications                               | # Protein Groups | # Proteins | # PSMs | Master Protein Accessions | Positions in Master Proteins | Modifications in Master Proteins | # Missed Cleavages | Theo. MH+ [Da]       | Found in Sample: [S2] F2: Sample      | Confidence (by Search Engine): Mascot | Ions Score (by Search Engine): Mascot |
| slr1934    | pyruvate dehydrogenase E1 component, alpha subunit | 39                                          | 14               | 28         | 14     | 342                       | 38,1                         | 5.19                             | 8.32               | 14                   | High                                  | 1                                     |                                       |
| High       | [R].AGEGPTLIEALTYR.[F]                             |                                             | 1                | 1          | 2      | slr1934                   | slr1934 [248-261]            |                                  | 0                  | 1490,785             | High                                  | High                                  | 80                                    |
| High       | [R].ATSQPEIYK.[K]                                  |                                             | 1                | 1          | 2      | slr1934                   | slr1934 [207-215]            |                                  | 0                  | 1036,531             | High                                  | High                                  | 28                                    |
| High       | [R].ATSQPEIYKK.[A]                                 |                                             | 1                | 1          | 4      | slr1934                   | slr1934 [207-216]            |                                  | 1                  | 1164,626             | High                                  | High                                  | 38                                    |
| High       | [K].CAEMYR.[G]                                     | 1xCarbamidomethyl [C1];<br>1xOxidation [M4] | 1                | 1          | 1      | slr1934                   | slr1934 [39-45]              |                                  | 0                  | 1008,391             | High                                  | High                                  | 32                                    |
| High       | [R].DHSVHALSAGVPAR.[E]                             |                                             | 1                | 1          | 4      | slr1934                   | slr1934 [82-94]              |                                  | 0                  | 1329,702             | High                                  | High                                  | 64                                    |
| High       | [R].EVMAELFGK.[E]                                  |                                             | 1                | 1          | 1      | slr1934                   | slr1934 [95-103]             |                                  | 0                  | 1023,518             | High                                  | High                                  | 39                                    |
| High       | [R].EVMAELFGK.[E]                                  | 1xOxidation [M3]                            | 1                | 1          | 2      | slr1934                   | slr1934 [95-103]             |                                  | 0                  | 1039,513             | High                                  | High                                  | 40                                    |
| High       | [K].FAAFMTEHELASNEELK.[A]                          | 1xOxidation [M5]                            | 1                | 1          | 1      | slr1934                   | slr1934 [291-307]            |                                  | 0                  | 1982,916             | High                                  | High                                  | 59                                    |
| High       | [R].FRGSLADPDEL.R.[S]                              |                                             | 1                | 1          | 2      | slr1934                   | slr1934 [262-274]            |                                  | 1                  | 1512,755             | High                                  | High                                  | 44                                    |
| High       | [R].GHS LADPDEL.R.[S]                              |                                             | 1                | 1          | 3      | slr1934                   | slr1934 [264-274]            |                                  | 0                  | 1209,586             | High                                  | High                                  | 61                                    |
| High       | [R].GHS LADPDELRS AEEK.[Q]                         |                                             | 1                | 1          | 2      | slr1934                   | slr1934 [264-279]            |                                  | 1                  | 1753,835             | High                                  | High                                  | 44                                    |
| High       | [R].ILPELNTAEISLDR.[E]                             |                                             | 1                | 1          | 1      | slr1934                   | slr1934 [6-19]               |                                  | 0                  | 1583,864             | High                                  | High                                  | 27                                    |
| High       | [K].LPILFVVENNK.[W]                                |                                             | 1                | 1          | 1      | slr1934                   | slr1934 [187-197]            |                                  | 0                  | 1285,751             | High                                  | High                                  | 41                                    |
| High       | [R].QDEDYVCSTYR.[D]                                | 1xCarbamidomethyl [C7]                      | 1                | 1          | 1      | slr1934                   | slr1934 [71-81]              |                                  | 0                  | 1435,579             | High                                  | High                                  | 72                                    |
| High       | [K].VATEAVAR.[A]                                   |                                             | 1                | 1          | 1      | slr1934                   | slr1934 [238-245]            |                                  | 0                  | 816,4574             | High                                  | High                                  | 53                                    |
